# Supplementary material for: Size‐Selective Hydroformylation by a Rhodium Catalyst Confined in a Supramolecular Cage
Source: PubMed Central journal article supplement — Chemistry. 2018 Dec 11;25(2):609–20. doi: 10.1002/chem.201804333 (PMC6391983; doi:10.1002/chem.201804333), 2018-12-11
Supplement: CHEM-25-609-s001.pdf [file CHEM-25-609-s001.pdf]

# CHEMISTRY

## A **European** Journal

### Supporting Information

#### **Size-Selective Hydroformylation by a Rhodium Catalyst Confined in a Supramolecular Cage**

Sandra S. Nurttila,<sup>[a]</sup> Wolfgang Brenner,<sup>[b]</sup> Jesús Mosquera,<sup>[b]</sup> Kaj M. van Vliet,<sup>[a]</sup>  
Jonathan R. Nitschke,<sup>[b]</sup> and Joost N. H. Reek\*<sup>[a]</sup>

chem\_201804333\_sm\_miscellaneous\_information.pdf

Supplementary Materials for  
**Size-selective hydroformylation by a rhodium catalyst confined  
in a supramolecular cage**

Sandra S. Nurttila,<sup>[a]</sup> Wolfgang Brenner,<sup>[b]</sup> Jesús Mosquera,<sup>[b]</sup> Kaj M. van Vliet,<sup>[a]</sup> Jonathan R.  
Nitschke,<sup>[b]</sup> and Joost N. H. Reek\*<sup>[a]</sup>

[a] S.S. Nurttila, Prof. Dr. J.N.H. Reek

Homogeneous, Supramolecular and Bio-Inspired Catalysis, Van 't Hoff Institute for Molecular  
Sciences

University of Amsterdam

Science Park 904, 1098XH Amsterdam (The Netherlands)

[b] Dr. Wolfgang Brenner, Dr. Jesús Mosquera, Prof. Dr. J.R. Nitschke

Department of Chemistry, University of Cambridge

Lensfield Road, CB2 1EW Cambridge (United Kingdom)

Email: [j.n.h.reek@uva.nl](mailto:j.n.h.reek@uva.nl)

## Contents

|                                                                                              |    |
|----------------------------------------------------------------------------------------------|----|
| 1. Materials and methods.....                                                                | 3  |
| 2. Synthesis and characterisation of ligands <b>L1</b> , <b>L2</b> and <b>L3</b> .....       | 4  |
| 3. Synthesis and characterisation of <b>Au1</b> .....                                        | 9  |
| 4. Synthesis and characterisation of building block <b>Zn-P</b> .....                        | 12 |
| 5. Synthesis and characterisation of <b>Fe<sub>4</sub>(Zn-L)<sub>6</sub></b> .....           | 16 |
| 6. Synthesis and characterisation of substrate <b>Sub1</b> .....                             | 23 |
| 7. Binding studies of <b>Fe<sub>4</sub>(Zn-L)<sub>6</sub></b> with various guests .....      | 25 |
| 8. Encapsulation studies of <b>Fe<sub>4</sub>(Zn-L)<sub>6</sub></b> with various guests..... | 43 |
| 9. Formation and characterization of the active species .....                                | 62 |
| 10. Cage and guest volume determination .....                                                | 72 |
| 11. XTB and DFT calculations.....                                                            | 73 |
| 12. Catalysis .....                                                                          | 78 |
| 13. High-pressure Infrared (HP IR) studies under syngas.....                                 | 80 |
| 14. Cage stability under hydroformylation conditions.....                                    | 81 |
| 15. General titration fitting procedure.....                                                 | 81 |
| 16. References .....                                                                         | 84 |

## 1. Materials and methods

All reactions were carried out under an atmosphere of N<sub>2</sub> using standard Schlenk techniques when noted. All solvents were distilled prior to use by conventional methods. NMR spectra were recorded on a Bruker AMX 300 (300.1 MHz, 75.5 MHz and 121.5 MHz for <sup>1</sup>H, <sup>13</sup>C and <sup>31</sup>P respectively), Bruker AMX 400 (400.1 MHz, 100.6 MHz and 162.0 MHz for <sup>1</sup>H, <sup>13</sup>C and <sup>31</sup>P respectively) and Bruker AMX 500 (500.1 MHz, 125.8 MHz and 202.5 MHz for <sup>1</sup>H, <sup>13</sup>C and <sup>31</sup>P respectively). <sup>1</sup>H NMR spectral data are referenced to the solvent residual signal (7.26 ppm for CDCl<sub>3</sub>, 3.58 ppm for THF-*d*<sub>8</sub>, 5.32 ppm for CD<sub>2</sub>Cl<sub>2</sub> and 1.32 ppm for CD<sub>3</sub>CN), <sup>31</sup>P NMR data are given relative to external H<sub>3</sub>PO<sub>4</sub> and <sup>19</sup>F NMR data are given relative to external CFCl<sub>3</sub>. 2D <sup>1</sup>H-DOSY spectral data were performed with temperature and gradient calibration prior to the measurements, and the temperature was kept at 298 K during the measurements. Low resolution electrospray ionisation mass spectra (ESI-MS) were obtained on a Micromass Quattro LC. Detection was in positive-ion mode, the cone voltage was 13 eV, the desolvation and ionisation temperature were 313 K. The solution was infused from a Harvard Syringe Pump at a rate of 10 μL per minute. Coldspray ionisation mass spectra (CSI-MS) were obtained on an AccuTOF LC, JMS-T100LP Mass spectrometer (JEOL, Japan). Detection was in positive-ion mode, needle voltage 2000 V, Orifice 1 voltage 90 V, Orifice 2 voltage 9 V, Ring Lens voltage 22 V, ion source temperature 80°C, spray temperature 250°C, flow injection with a flow rate of 0.01 mL/min. High resolution mass spectra of cage samples were collected on a HR-ToF Bruker Daltonik GmbH (Bremen, Germany) Impact II, an ESI-ToF MS capable of resolution of at least 40000 FWHM, which was coupled to a Bruker cryospray unit. Detection was in positive-ion mode and the source voltage was between 4 and 6 kV. The flow rates were 18 ul/hr. The drying gas (N<sub>2</sub>) was held at -35 °C and the spray gas was held at -40 °C. The machine was calibrated prior to every experiment via direct infusion of a TFA-Na solution, which provided a m/z range of singly charged peaks up to 3500 Da in both ion modes. UV-Vis spectroscopy was performed on a single beam Hewlett Packard 8453 spectrometer and a double beam Shimadzu UV-2600 spectrometer in a quartz cuvette with a path length of 10 mm using the solvent as a background. IR measurements were conducted on a Thermo Nicolet Nexus FT-IR spectrometer. Gas chromatographic analyses were conducted on Shimadzu GC-17A apparatus (split/splitless injector, J&W 30 m column, film thickness 3.0 μm, carrier gas 70kPa He, FID detector) and Trace GC ultra-apparatus (split/splitless injector, Restek RTX1 column, film thickness 0.25 μm, carrier gas 70kPa He, FID detector). All reagents were purchased from commercial suppliers and used without further purification.

## 2. Synthesis and characterisation of ligands L1, L2 and L3

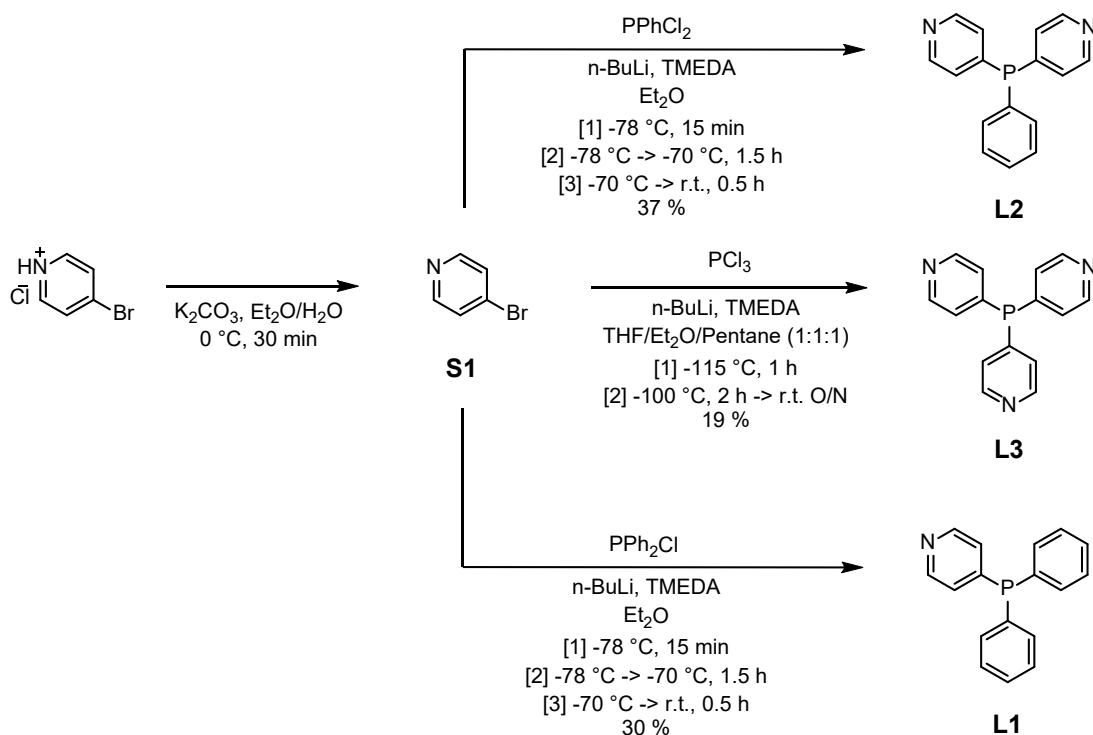

**L1, L2 and L3** were synthesised using two modified literature procedures<sup>[1,2]</sup>:

### 4-bromopyridine (**S1**):

4-bromopyridine hydrochloride (5.5 g, 28.3 mmol) and K<sub>2</sub>CO<sub>3</sub> (11.7 g, 84.9 mmol) were dissolved in water (300 mL) at 0 °C, resulting in effervescence and the separation of a yellow oily layer from the aqueous phase. The mixture was continuously stirred for 30 min while maintaining a temperature of 0 °C to avoid polymerisation of the formed **S1**. Next, the yellow oil was separated from the aqueous phase and the water layer was extracted with diethyl ether (3 x 70 mL). The oil and the combined organic phases were dried over MgSO<sub>4</sub>, filtered and the solvent was removed under reduced pressure at 0 °C to give **S1** as a yellow oil. The oil was immediately used for the next step without further purification.

### 4-(Diphenylphosphanyl)pyridine (**L1**):

n-BuLi (9.4 mL, 23.5 mmol, 2.5 M in hexanes) and freshly distilled and dried TMEDA (3.5 mL, 23.5 mmol) were transferred along with diethyl ether (20 mL) into a flame-dried Schlenk flask under N<sub>2</sub> atmosphere. The yellow solution was stirred at room temperature for 15 min, where after it was cooled to -78 °C using a dry ice/acetone cooling bath. Subsequently, a solution of **S1** (3.1 mL, 32.6 mmol) in diethyl ether (40 mL) was added dropwise over 15 min, while keeping the temperature at -78 °C. After 15 min of stirring the brown-red reaction mixture, a solution of PPh<sub>2</sub>Cl (3.3 mL, 18.1 mmol) in diethyl ether (20 mL) was added dropwise, where after the resulting brown reaction mixture was stirred for 1.5 h at -75 °C and then allowed to come to room temperature over 30 minutes. Next, a few blocks of ice and NH<sub>4</sub>OH (aq) (8 mL) were added to the beige suspension, where after the organic layer was separated and washed with degassed water (3 x 100 mL). The organic phase was dried with MgSO<sub>4</sub>, filtered and the solvent was removed under reduced pressure to give an orange-brown oil. The crude product was purified by column chromatography (silica, eluent: dichloromethane + 2% MeOH and 1% triethylamine) under N<sub>2</sub>

atmosphere to give **L1** as colourless crystals in 30% yield.  $^1\text{H}$  NMR (300 MHz,  $\text{CDCl}_3$ )  $\delta$  (ppm) = 8.53 – 8.48 (m, 1H), 7.42 – 7.31 (m, 5H), 7.10 (t,  $J = 6.2$  Hz, 1H);  $^{31}\text{P}$  NMR (121 MHz,  $\text{CDCl}_3$ )  $\delta$  (ppm) = -7.05.

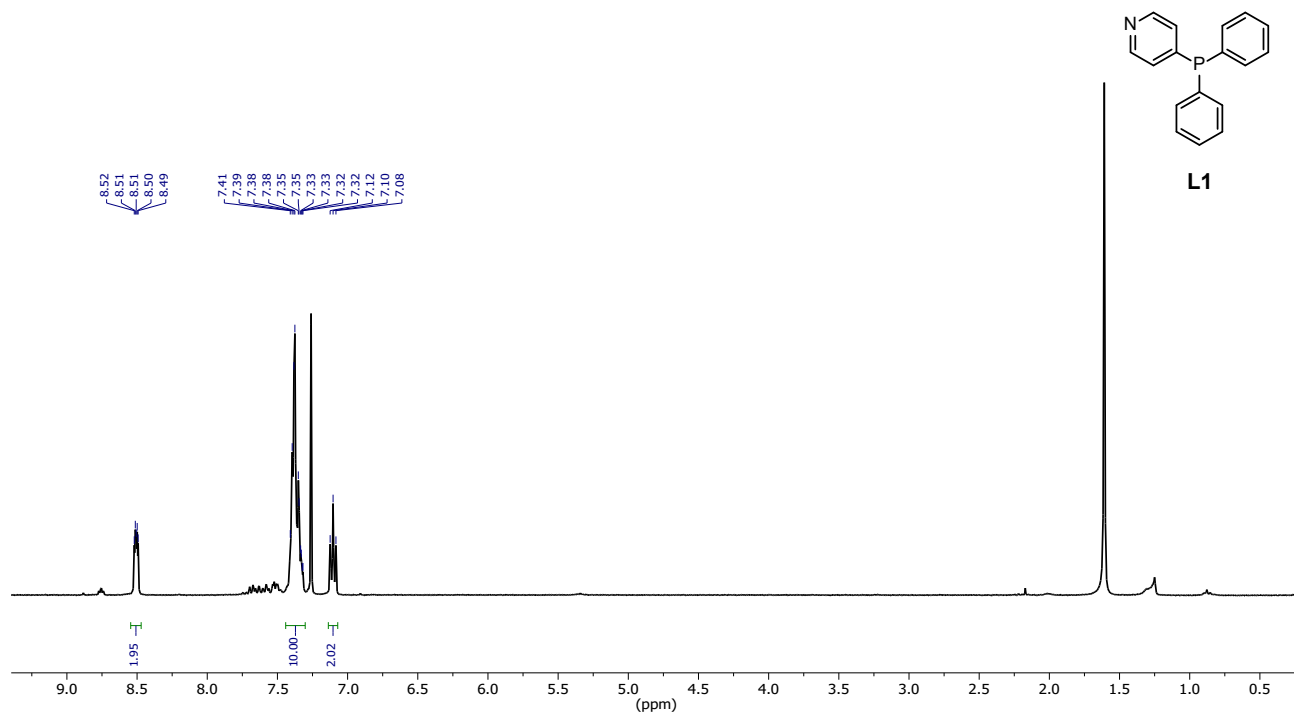

**Figure S 1.**  $^1\text{H}$  NMR (300 MHz, 298 K) of **L1** in  $\text{CDCl}_3$ .

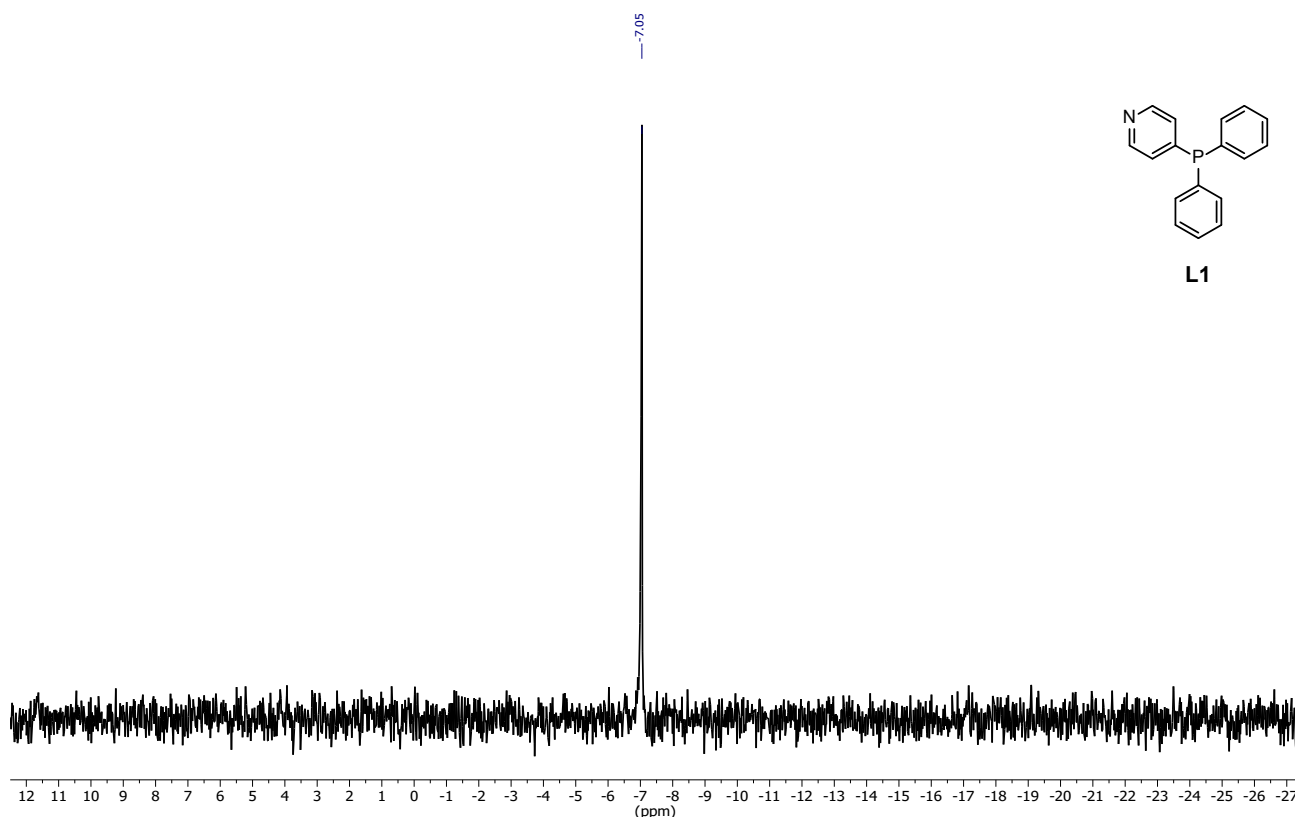

**Figure S 2.**  $^{31}\text{P}$  NMR (121 MHz, 298 K) of **L1** in  $\text{CDCl}_3$ .

#### 4,4'-(Phenylphosphanediyl)dipyridine (**L2**):

*n*-BuLi (4.5 mL, 11.3 mmol, 2.5 M in hexanes) and freshly distilled and dried TMEDA (1.7 mL, 11.3 mmol) were transferred along with diethyl ether (9 mL) into a flame-dried Schlenk flask under  $\text{N}_2$  atmosphere. The yellow solution was stirred at room temperature for 15 min, where after it was cooled to  $-78^\circ\text{C}$  using a dry ice/acetone cooling bath. Subsequently, a solution of **S1** (1.4 mL, 14.8 mmol) in diethyl ether (17 mL) was added dropwise over 15 min, while keeping the temperature at  $-78^\circ\text{C}$ . After 15 min of stirring the brown-red reaction mixture, a solution of  $\text{PPhCl}_2$  (0.6 mL, 4.9 mmol) in diethyl ether (5 mL) was added dropwise, where after the resulting dark yellow reaction mixture was stirred for 1.5 h at  $-75^\circ\text{C}$  and then allowed to come to room temperature over 30 minutes. Next, a few blocks of ice and  $\text{NH}_4\text{OH}$  (aq) (4.3 mL) were added to the suspension, where after the organic layer was separated and washed with degassed water (3 x 100 mL). The organic phase was dried with  $\text{MgSO}_4$ , filtered and the solvent was removed under reduced pressure to give a red-orange oil. The crude product was purified by column chromatography (silica, eluent: dichloromethane + 4% MeOH and 1.5% triethylamine) under  $\text{N}_2$  atmosphere to give **L2** as a waxy pale yellow solid in 37% yield.  $^1\text{H}$  NMR (300 MHz,  $\text{CDCl}_3$ )  $\delta$  (ppm) = 8.61 – 8.55 (m, 4H), 7.49 – 7.32 (m, 5H), 7.15 (m, 4H);  $^{31}\text{P}$  NMR (121 MHz,  $\text{CDCl}_3$ )  $\delta$  (ppm) = -9.08; HRMS (ESI $^+$ ) calc. for [**L2**] $^+$  ( $\text{C}_{16}\text{H}_{14}\text{N}_2\text{P}^+$ ) 265.0889, found 265.0907.

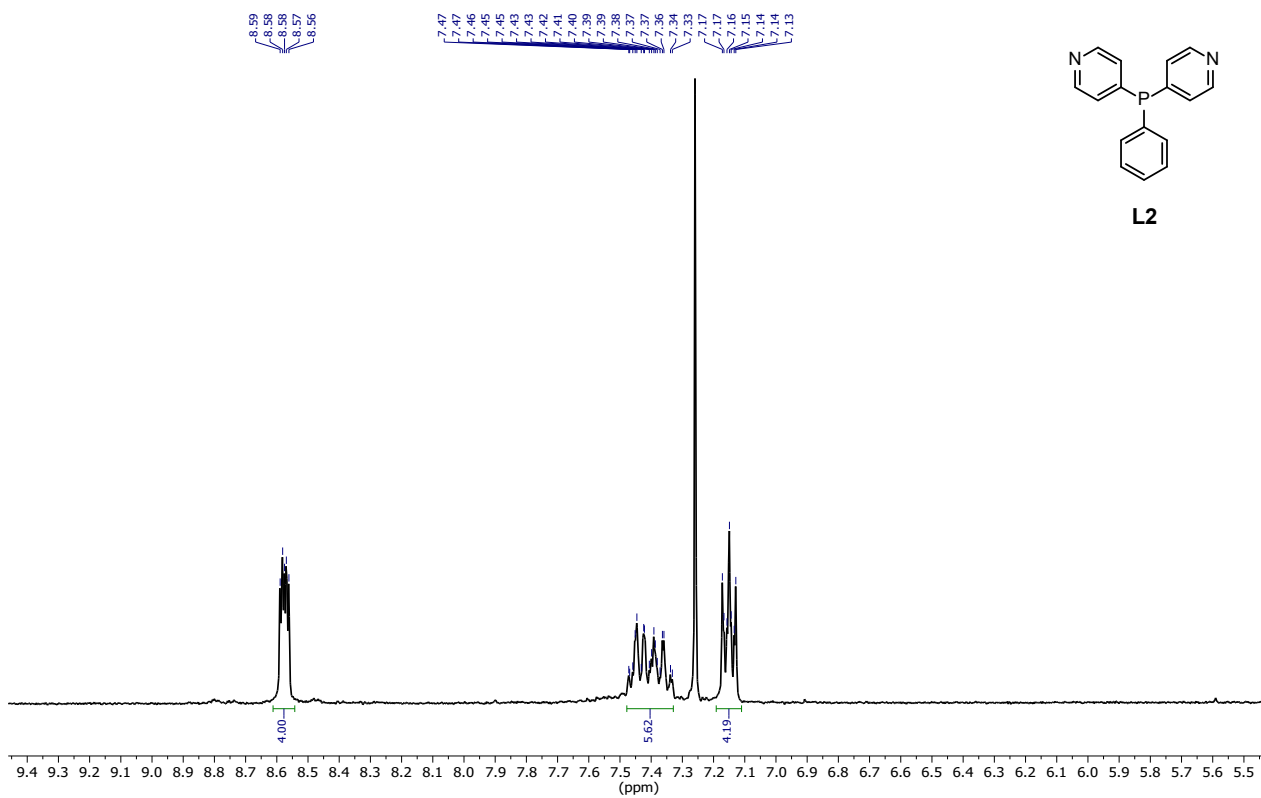

Figure S 3.  $^1\text{H}$  NMR (300 MHz, 298 K) of **L2** in  $\text{CDCl}_3$ .

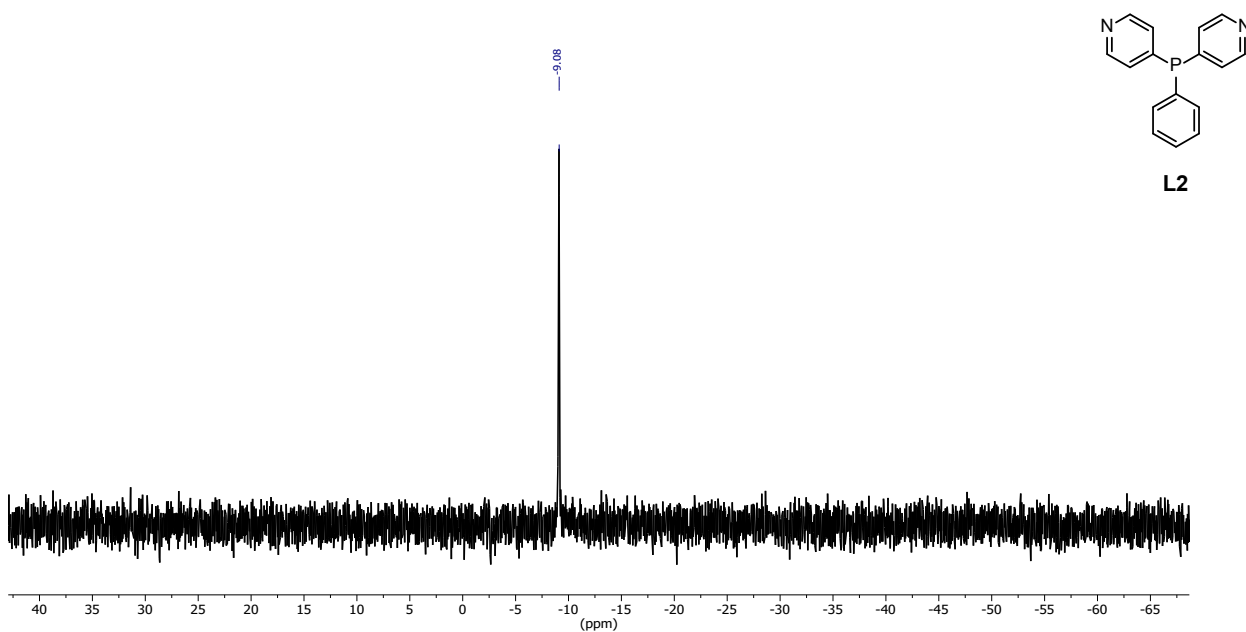

Figure S 4.  $^{31}\text{P}$  NMR (121 MHz, 298 K) of **L2** in  $\text{CDCl}_3$ .



### Tris(pyridin-4-yl)phosphane (**L3**):

n-BuLi (9.6 mL, 24 mmol, 2.5 M in hexanes) and freshly distilled and dried TMEDA (3.6 mL, 24 mmol) were transferred into a flame-dried Schlenk flask under N<sub>2</sub> atmosphere. The yellow solution was stirred at room temperature for 20 min, where after it was cooled to between -80 and -90°C using a pentane/liquid N<sub>2</sub> cooling bath. Next, pentane (25 mL), diethyl ether (25 mL) and tetrahydrofuran (25 mL) were added to the reaction mixture and the resulting solution was cooled to -115°C. Subsequently, a solution of **S1** (2.5 mL, 25.4 mmol) in diethyl ether (15 mL) was added dropwise over 15 min, while keeping the temperature at -115°C. 5 min later PCl<sub>3</sub> (0.6 mL, 7.2 mmol) was added dropwise, where after the resulting red-brown reaction mixture was heavily stirred for 1 h at -115°C and then 2 h at a temperature of -100 to -115°C, after which the reaction mixture was allowed to warm to room temperature slowly overnight. Next, the reaction mixture was quenched with degassed water resulting in the formation of a yellow-orange suspension. The suspension was extracted with degassed water (4 x 100 mL) and the combined aqueous layers were further extracted with chloroform (4 x 100 mL). The combined organic phases were dried over MgSO<sub>4</sub>, filtered and the solvent was removed under reduced pressure to give a yellow-orange solid. The crude product was purified by column chromatography (silica, eluent: chloroform/hexane = 3:1 + 2% triethylamine) under N<sub>2</sub> atmosphere to give **L3** as a pale-yellow crystalline solid in 19% yield. <sup>1</sup>H NMR (300 MHz, CDCl<sub>3</sub>) δ (ppm) = 8.64 (m, 2H), 7.21-7.13 (m, 2H); <sup>31</sup>P NMR (121 MHz, CDCl<sub>3</sub>) δ (ppm) = -11.46.

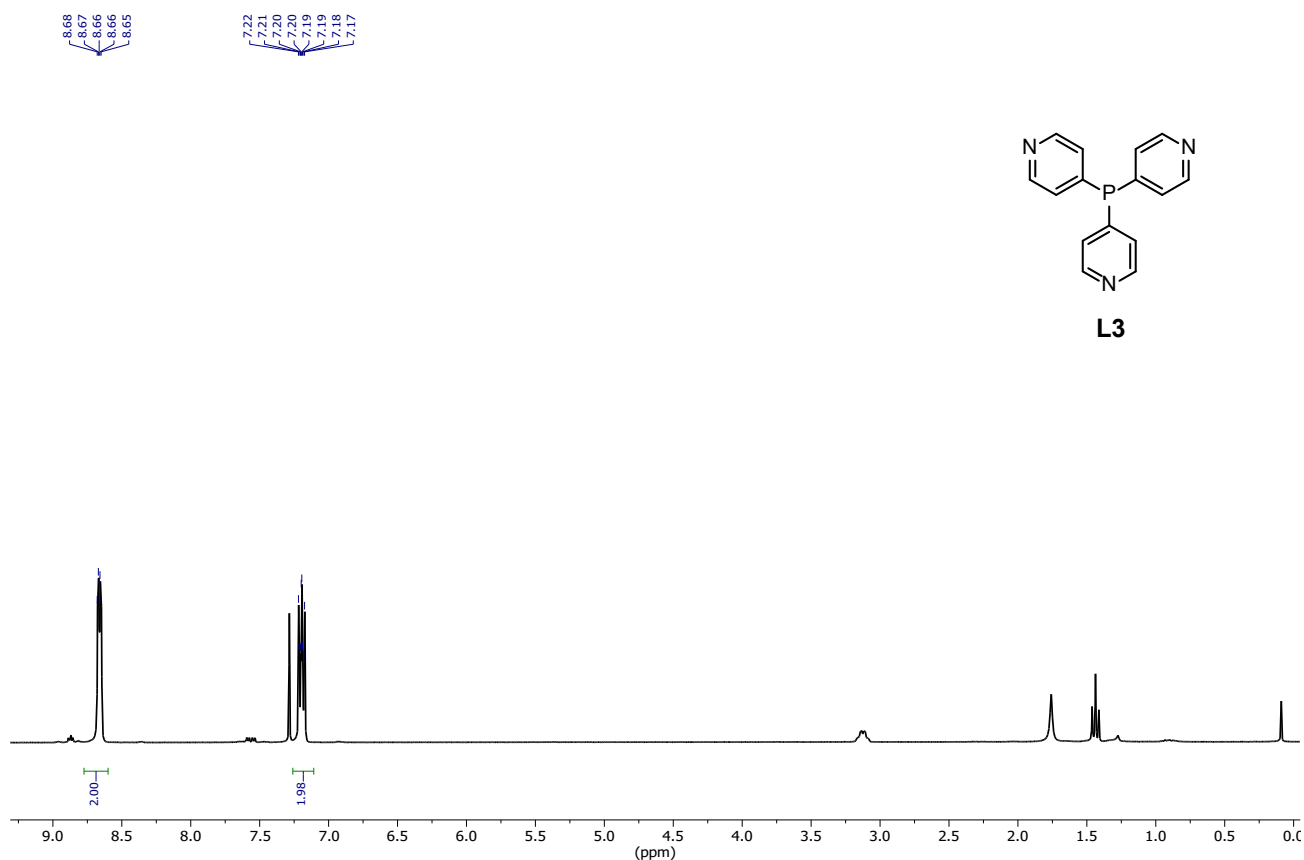

Figure S 5. <sup>1</sup>H NMR (300 MHz, 298 K) of **L3** in CDCl<sub>3</sub>.

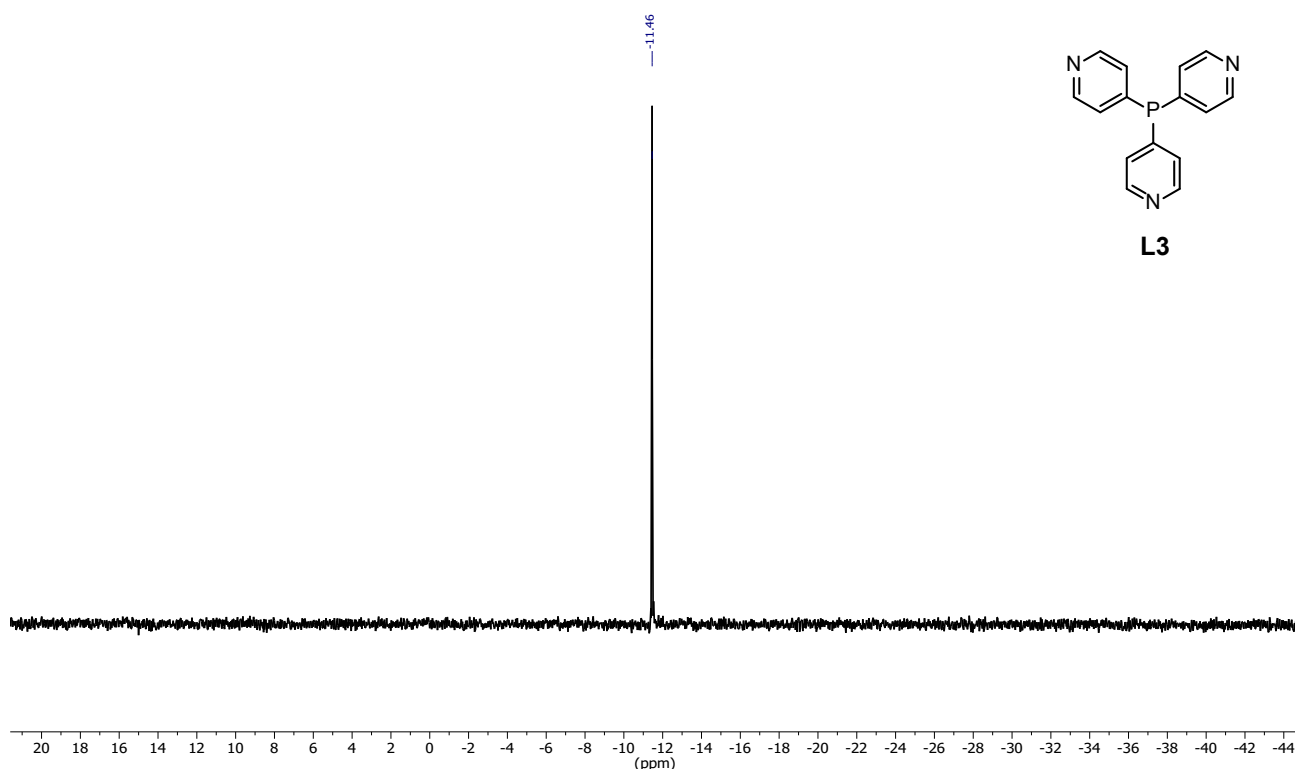

**Figure S 6.**  $^{31}\text{P}$  NMR (121 MHz, 298 K) of **L3** in  $\text{CDCl}_3$ .

### 3. Synthesis and characterisation of **Au1**

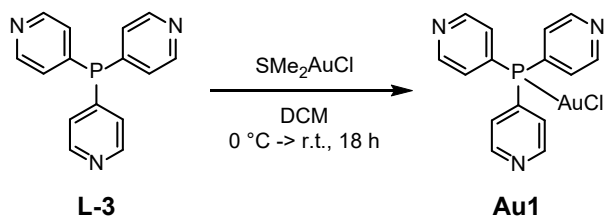

**Au-L-3** was synthesised using a modified literature procedure<sup>[3]</sup>:

A solution of  $\text{SMe}_2\text{AuCl}$  (21.5 mg, 73  $\mu\text{mol}$ ) in dichloromethane (5 mL) under  $\text{N}_2$  was cooled to  $0^\circ\text{C}$ , where after a solution of **L3** (19.5 mg, 73  $\mu\text{mol}$ ) in dichloromethane (5 mL) was added dropwise. The resulting yellow solution was allowed to come to room temperature and stirred for 18 h under  $\text{N}_2$ . Next, the solvent was removed under reduced pressure to give an off-white solid, which was further washed with pentane and cold ethanol to give **Au1** in 31% yield. Single crystals were grown by liquid-liquid diffusion of a toluene solution of **Au1** with pentane at  $4^\circ\text{C}$ .  $^1\text{H}$  NMR (300 MHz,  $\text{CDCl}_3$ )  $\delta$  (ppm) = 8.88 – 8.82 (m, 6H), 7.41 (ddd,  $J$  = 13.5, 4.4, 1.6 Hz, 6H).  $^{31}\text{P}$  NMR (121 MHz,  $\text{CDCl}_3$ )  $\delta$  (ppm) = 29.72. HRMS (ESI<sup>+</sup>) calc. for [**Au1**]<sup>+</sup> ( $\text{C}_{15}\text{H}_{13}\text{N}_3\text{PAuCl}^+$ ) 498.02011, found 498.02256.

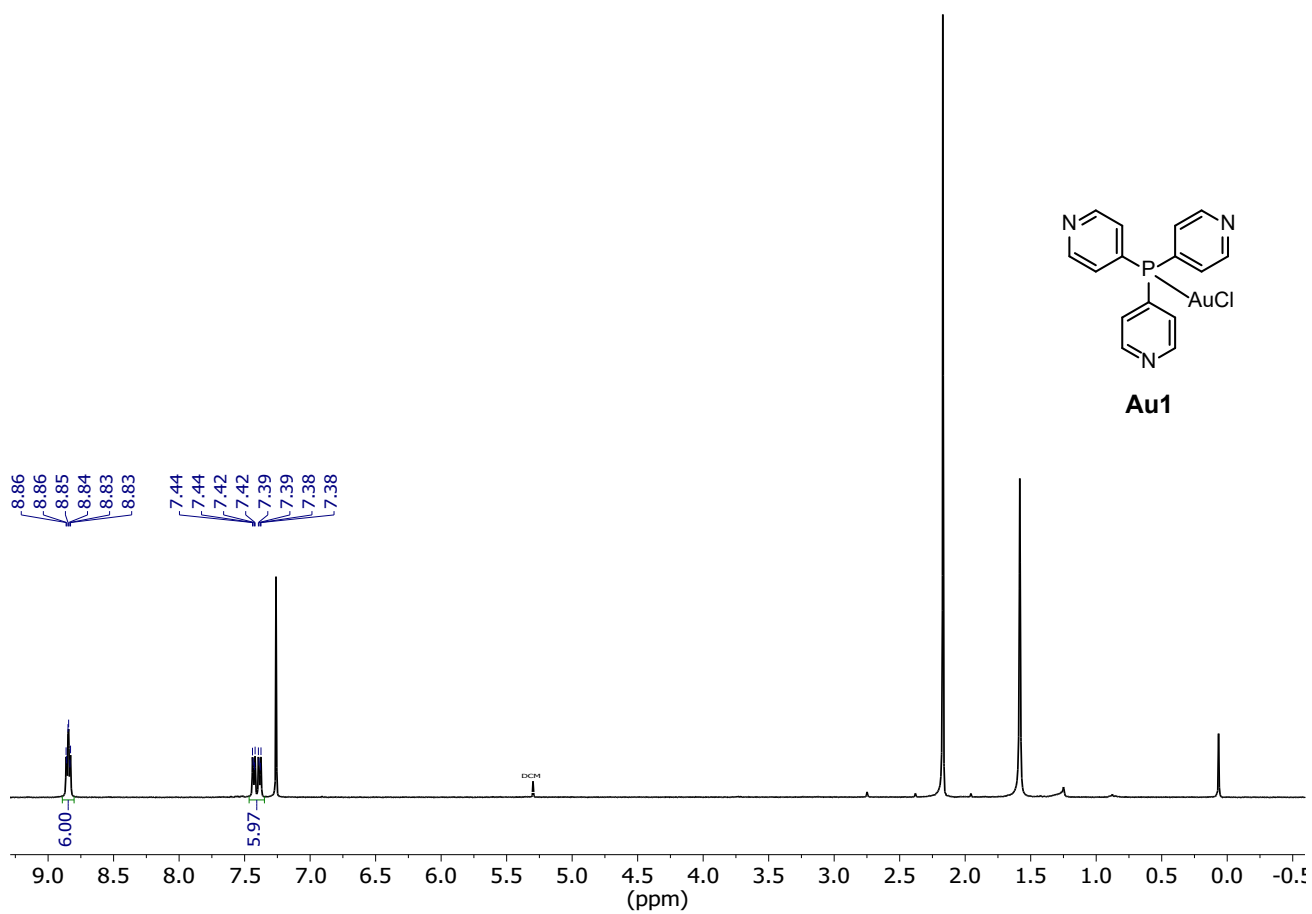

**Figure S 7.**  $^1\text{H NMR}$  (300 MHz, 298 K) of **Au1** in  $\text{CDCl}_3$ .

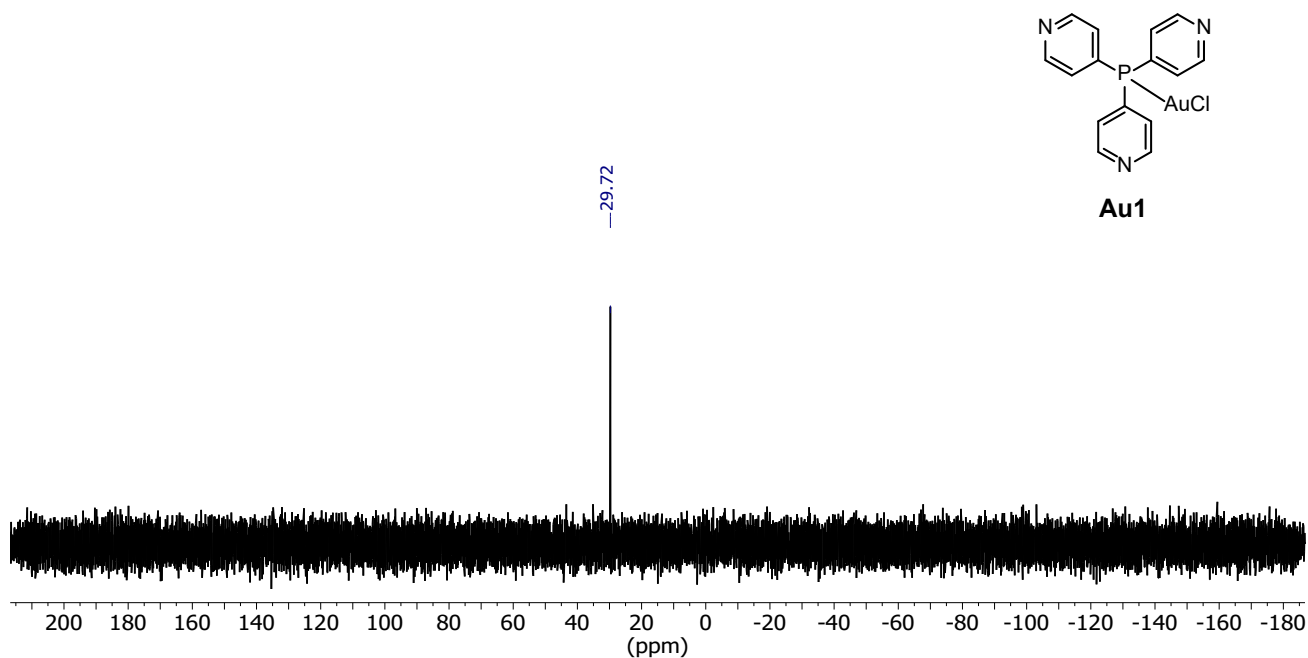

**Figure S 8.**  $^{31}\text{P}$  NMR (121 MHz, 298 K) of **Au1** in  $\text{CDCl}_3$ .

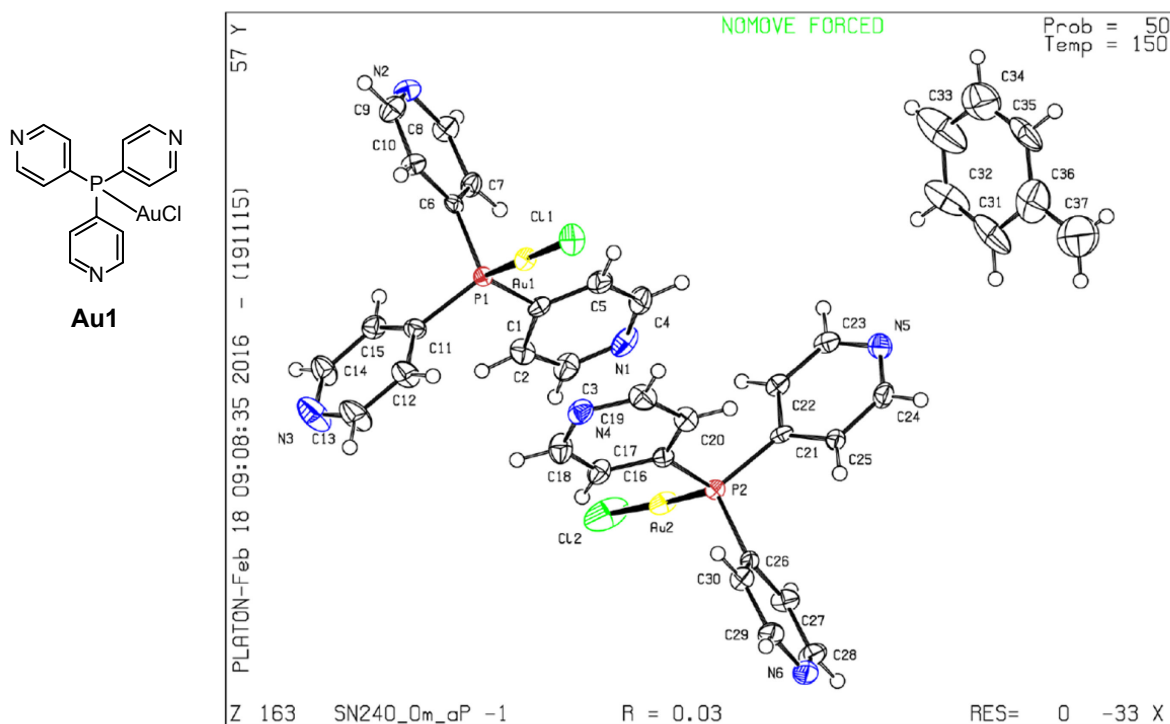

**Figure S 9.** X-ray crystal structure of complex **Au1** (CCDC number: 1819341). Thermal ellipsoids are drawn with 50% probability. Colour code: C, black and white; H, white; N, blue; P, red; Au, yellow; Cl, green.

#### 4. Synthesis and characterisation of building block Zn-P

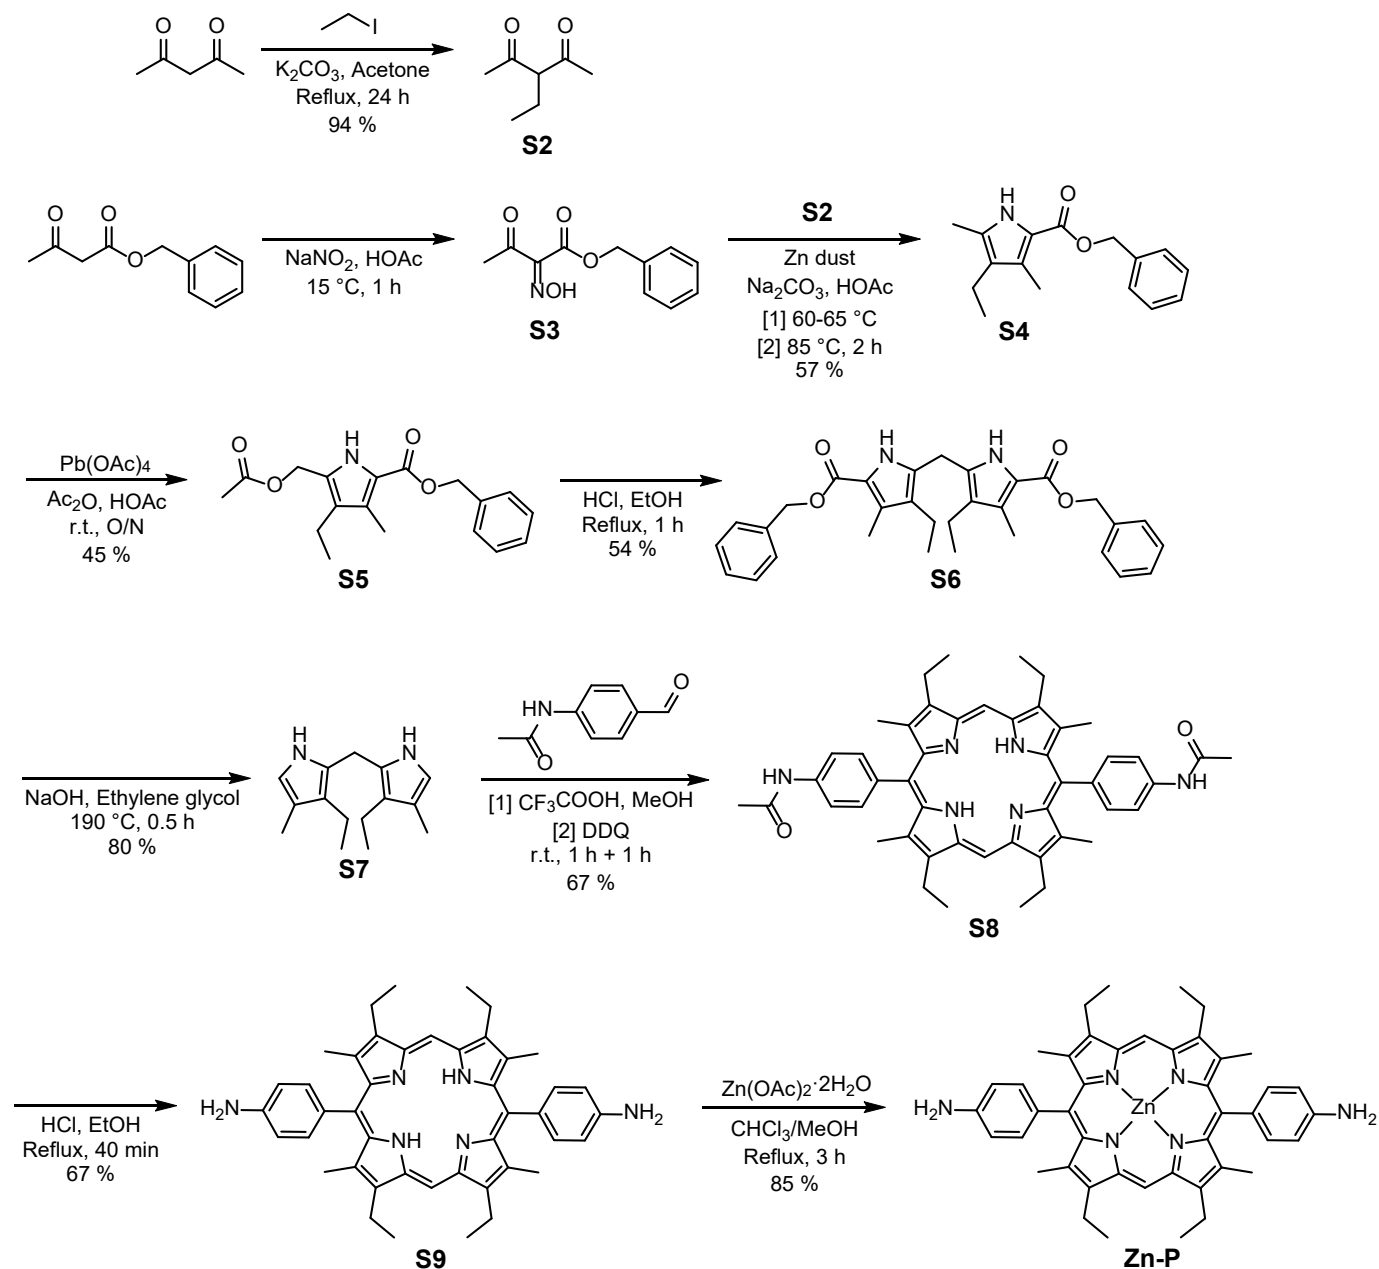

S2-S6 were synthesised using a literature procedure<sup>[4]</sup>, S7-S9 and Zn-P were synthesised using modified literature procedures<sup>[5,6]</sup>:

##### Bis(3-ethyl-4-methyl-1H-pyrrol-2-yl)methane (S7):

S6 (2.0 g, 5.3 mmol) and NaOH (0.85 g, 21.3 mmol) were transferred along with degassed ethylene glycol (20 mL) in a round-bottom Schlenk flask under an atmosphere of a N<sub>2</sub>. The suspension was heated to 190 °C for 30 minutes resulting in the formation of a tan solid at the bottom of the flask. Subsequently, the flask was immediately cooled on an ice bath, after which water was added to the flask in air to make the ethylene glycol less viscous. The suspension was extracted with dichloromethane (4 x 100 mL), dried with MgSO<sub>4</sub>, filtered and the solvent was removed under reduced pressure to yield a dark brown-red oil. The crude product was purified by column chromatography (silica, eluent: dichloromethane) to give S7

as a pale solid in 80% yield.  $^1\text{H NMR}$  (300 MHz,  $\text{CDCl}_3$ )  $\delta$  (ppm) = 7.35 (s, 2H), 6.43 – 6.30 (m, 2H), 3.83 (s, 2H), 2.46 (q,  $J$  = 7.5 Hz, 4H), 2.07 (s, 6H), 1.12 (t,  $J$  = 7.5 Hz, 6H).

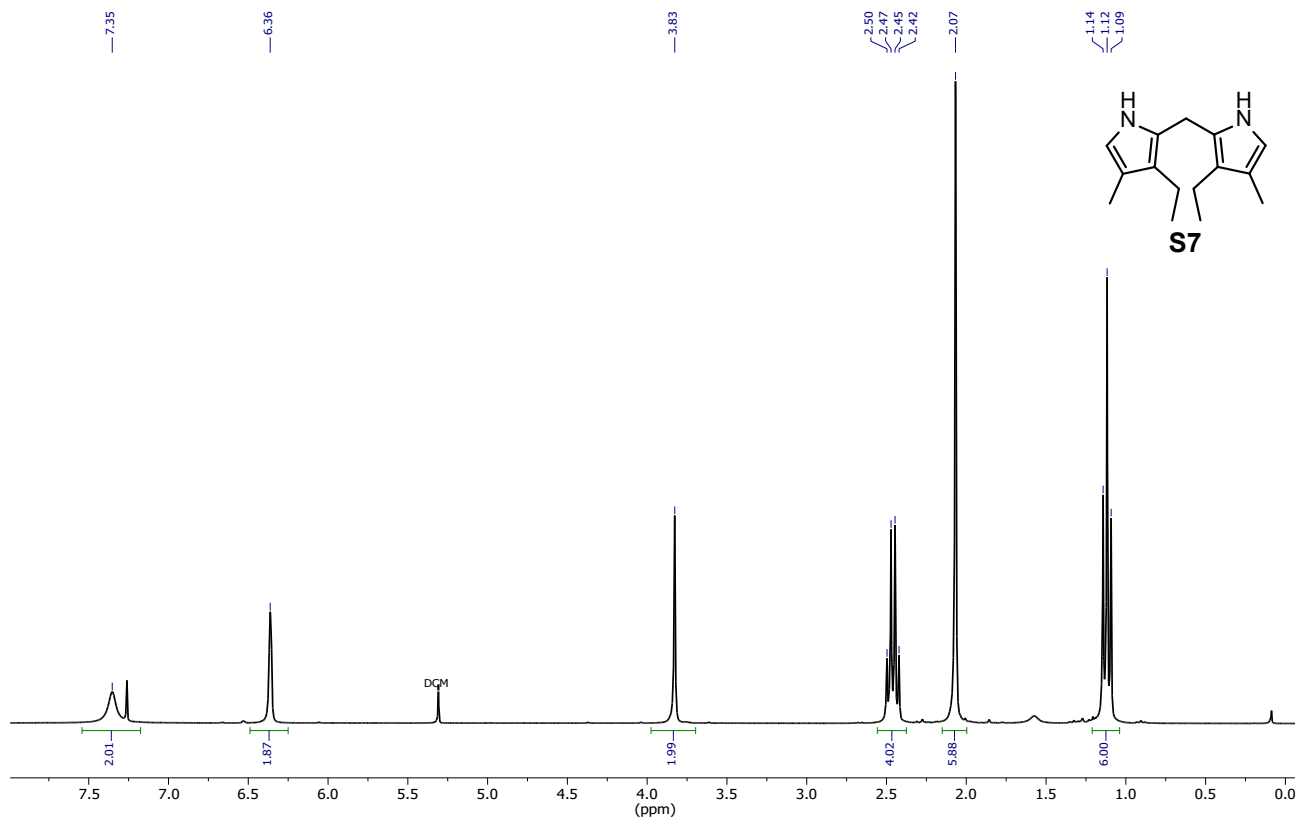

**Figure S 10.**  $^1\text{H NMR}$  (300 MHz, 298 K) of **S7** in  $\text{CDCl}_3$ .

***N,N'*-((2,8,12,18-tetraethyl-3,7,13,17-tetramethylporphyrin-5,15-diyl)bis(4,1-phenylene)) diacetamide (**S8**):**

**S7** (0.25 g, 1.1 mmol) and 4-acetamidobenzaldehyde (0.18 g, 1.1 mmol) were transferred along with dry and degassed methanol (100 mL) into a two-necked Schlenk flask under an atmosphere of  $\text{N}_2$ . Next, trifluoroacetic acid (10.1  $\mu\text{L}$ , 0.1 mmol) was added and the reaction mixture was stirred at room temperature covered in foil for 1 h, followed by the addition of DDQ (0.37 g, 1.6 mmol). The resulting black solution was further stirred in air at room temperature covered in foil to complete the oxidation of the porphyrinogen. Subsequently, chloroform (100 mL) and triethylamine (1 mL) were added. Most of the polypyrrole by-product was removed with a short plug of silica eluting with a 9:1 mixture of chloroform and methanol. The resulting crude solid was purified with column chromatography (silica, eluent: chloroform/tetrahydrofuran = 8:2) to give **S8** as a purple solid in 67% yield.  $^1\text{H NMR}$  (300 MHz,  $\text{THF}-d_8$ )  $\delta$  (ppm) = 10.22 (s, 2H), 9.64 (s, 1H), 8.09 (d,  $J$  = 8.3 Hz, 2H), 7.93 (d,  $J$  = 8.4 Hz, 1H), 4.05 (q,  $J$  = 7.5 Hz, 4H), 2.58 (s, 6H), 2.22 (s, 3H), 1.78 (t,  $J$  = 7.6 Hz, 6H), -2.29 (s, 1H).

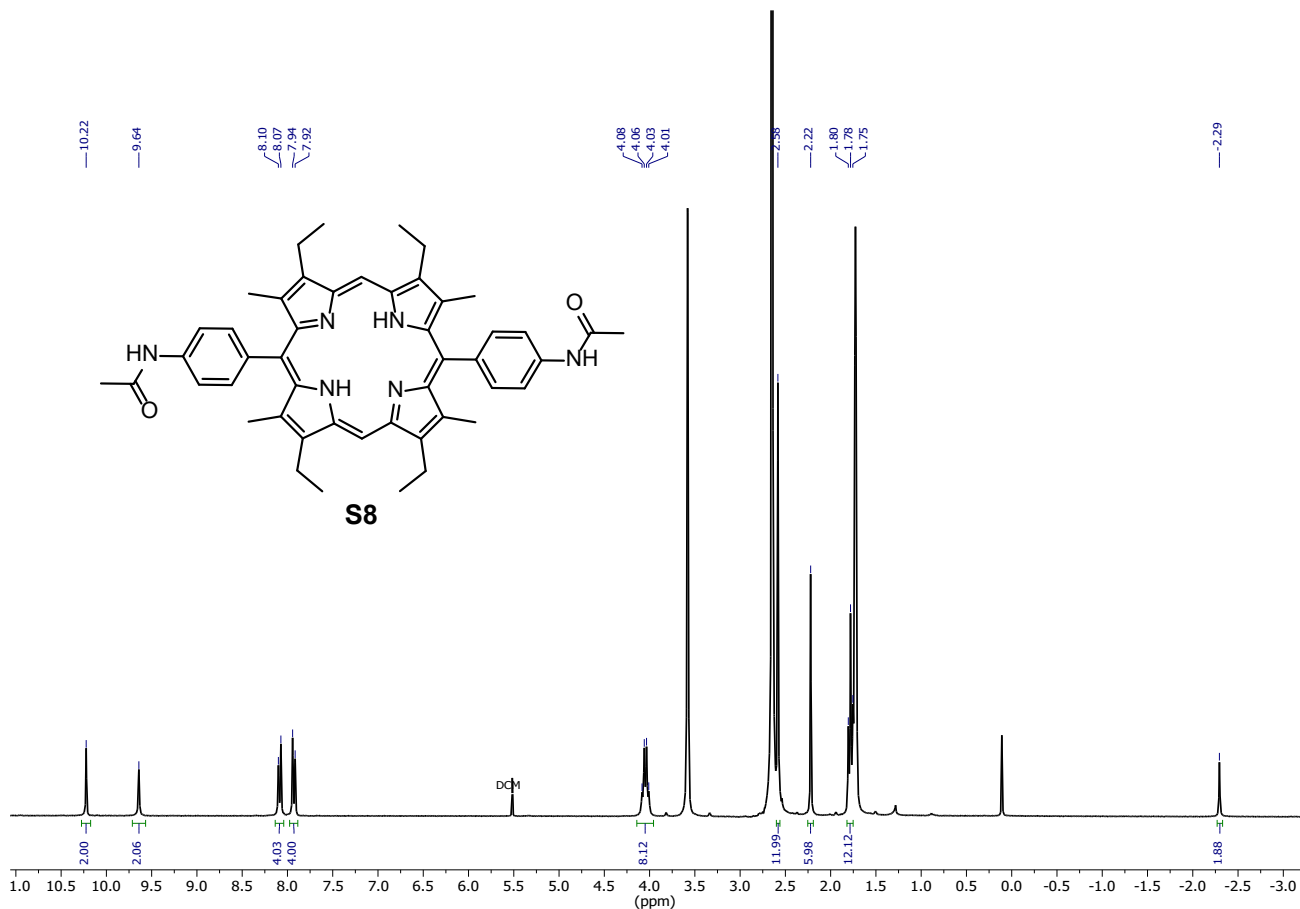

**Figure S 11.**  $^1\text{H}$  NMR (300 MHz, 298 K) of **S8** in THF- $d_8$ .

#### 4,4'-(2,8,12,18-tetraethyl-3,7,13,17-tetramethylporphyrin-5,15-diyl)dianiline (**S9**):

**S8** (0.5 g, 0.67 mmol), conc. HCl (20.7 mL) and EtOH (31 mL) were transferred to a round-bottom flask. The resulting green solution was heated at reflux for 40 minutes, after which it was cooled in an ice bath. Next, the solution was neutralised with sat.  $\text{Na}_2\text{CO}_3$  (aq) precipitating a purple solid. The residual ethanol was removed under reduced pressure, where after filtration gave pure **S9** as a purple solid in 67% yield.  $^1\text{H}$  NMR (300 MHz,  $\text{CD}_2\text{Cl}_2$ )  $\delta$  (ppm) = 10.23 (s, 2H), 7.77 (d,  $J$  = 8.2 Hz, 4H), 7.08 (d,  $J$  = 8.2 Hz, 4H), 4.24 – 3.98 (m, 12H), 2.64 (s, 12H), 1.79 (t,  $J$  = 7.5 Hz, 12H), -2.54 (s, 2H).

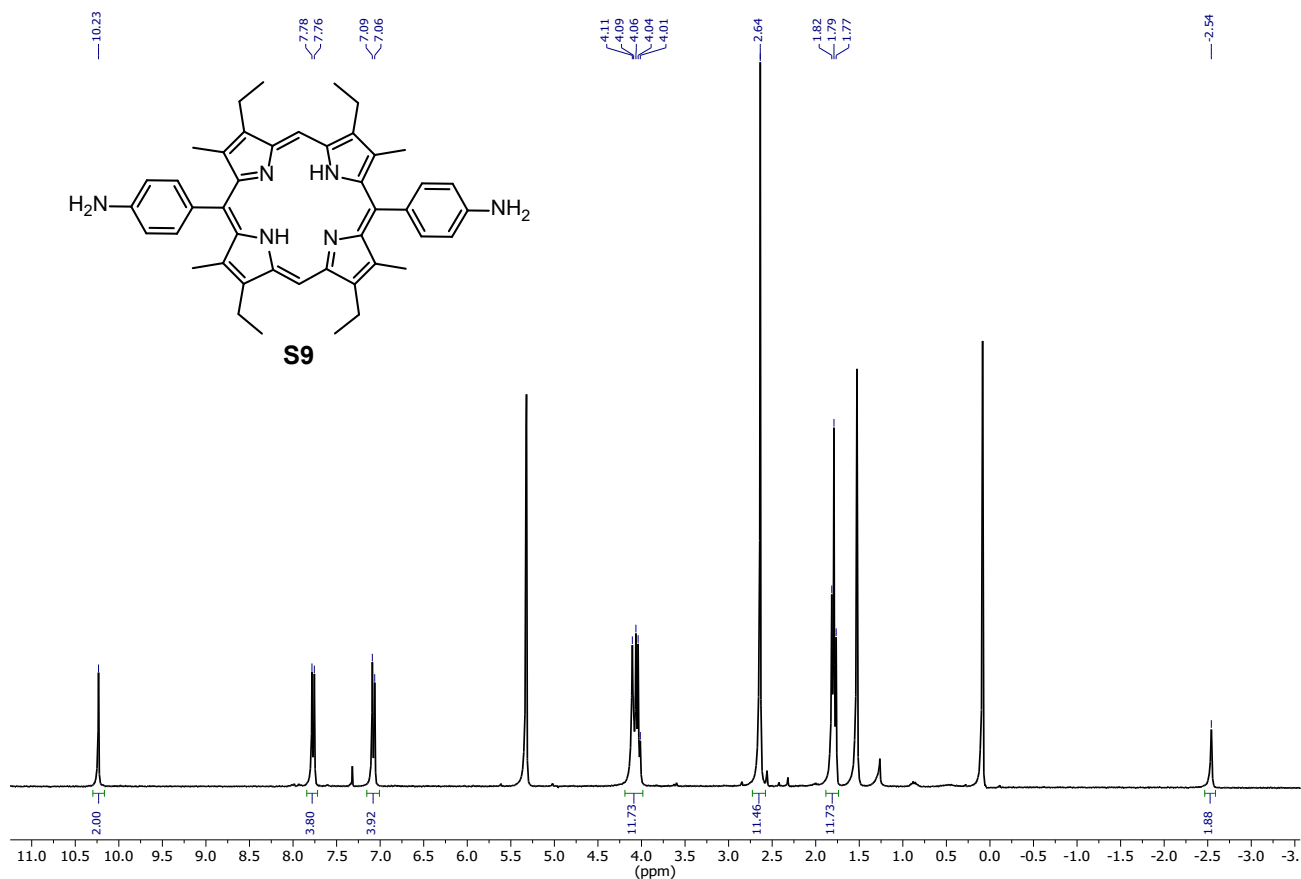

**Figure S 12.**  $^1\text{H}$  NMR (300 MHz, 298 K) of **S9** in  $\text{CD}_2\text{Cl}_2$ .

**4,4'-(2,8,12,18-tetraethyl-3,7,13,17-tetramethylporphyrin-5,15-diyl)dianiline zinc(II) (Zn-P):**

**S9** (0.3 g, 0.45 mmol) and  $\text{Zn}(\text{OAc})_2 \cdot \text{H}_2\text{O}$  (0.5 g, 2.26 mmol) were transferred into a round-bottom flask along with chloroform (90 mL) and methanol (24 mL). The purple-pink solution was heated to reflux for 3 h, where after it was cooled down to room temperature, washed with saturated  $\text{Na}_2\text{CO}_3$  (aq) and water. The resulting crude purple solid was purified with column chromatography (silica, eluent: chloroform, short column like a plug) to give **Zn-P** as a bright purple solid in 85% yield.  $^1\text{H}$  NMR (300 MHz,  $\text{CD}_2\text{Cl}_2$ )  $\delta$  (ppm) = 10.18 (s, 2H), 7.75 (d,  $J$  = 8.1 Hz, 4H), 7.03 (d,  $J$  = 8.2 Hz, 4H), 5.33 (s, 4H), 4.03 (q,  $J$  = 7.8 Hz, 8H), 2.60 (s, 12H), 1.78 (t,  $J$  = 7.6 Hz, 12H).



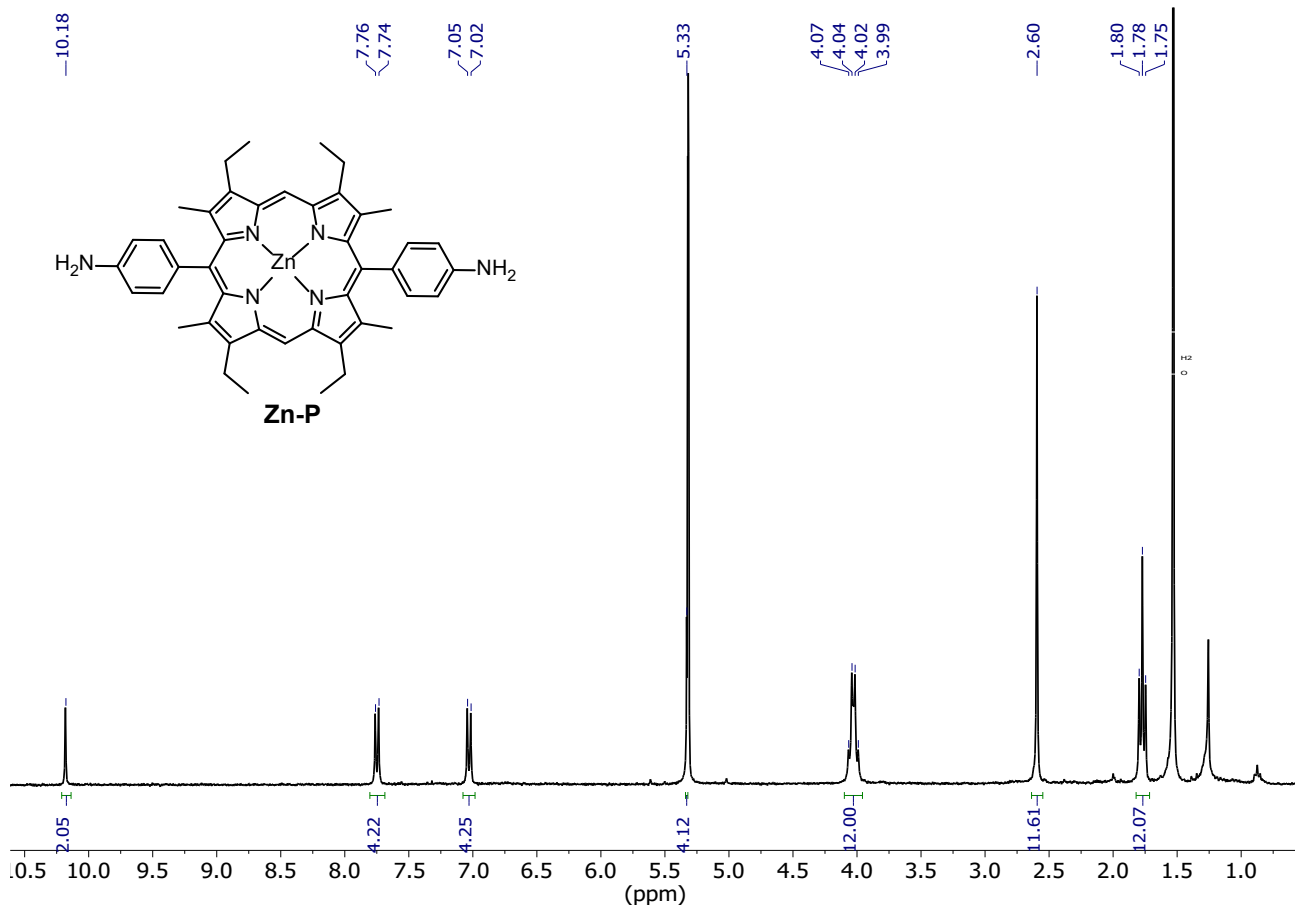

**Figure S 13.**  $^1\text{H}$  NMR (300 MHz, 298 K) of **Zn-P** in  $\text{CD}_2\text{Cl}_2$ .

## 5. Synthesis and characterisation of $\text{Fe}_4(\text{Zn-L})_6$

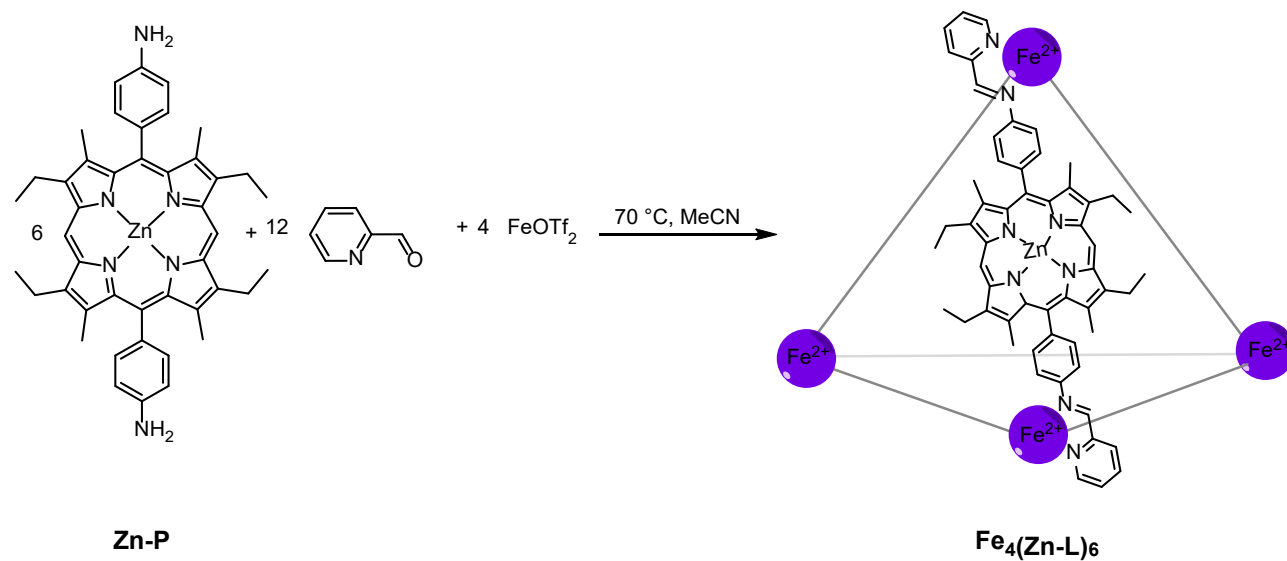

**Zn-P** (68.7 mg, 94.7  $\mu\text{mol}$ ), 2-formylpyridine (18.6  $\mu\text{L}$ , 195.6  $\mu\text{mol}$ ) and  $\text{Fe}(\text{OTf})_2$  (22 mg, 62.1  $\mu\text{mol}$ ) were transferred along with acetonitrile (8.5 mL) into a Schlenk flask under an atmosphere of  $\text{N}_2$ . The dark purple suspension was sonicated and then heated at  $70^\circ\text{C}$  for 4 h to complete the cage formation.

Subsequently, the resulting dark purple solution was cooled down to room temperature and added dropwise into diethyl ether (10 mL) to give rise to a purple suspension. The solid was recovered by centrifugation, where after it was further washed with diethyl ether (2 x 4 mL). The residual diethyl ether was removed to give pure **Fe<sub>4</sub>(Zn-L)<sub>6</sub>** as a purple, microcrystalline solid in 93% yield. <sup>1</sup>H NMR (300 MHz, CD<sub>3</sub>CN) δ (ppm) = 10.03 – 9.81 (m, 1H), 9.70 (bs, 0.5H), 9.59 (m, 0.5H), 8.84 (m, 1H), 8.58 (m, 1H), 8.14 – 7.89 (m, 2H), 7.79 (bs, 2H), 6.83 (bs, 2H), 3.92 (bs, 4H), 2.52 – 2.36 (m, 6H), 1.55 (t, *J* = 7.7 Hz, 6H); <sup>13</sup>C NMR (126 MHz, CD<sub>3</sub>CN) δ (ppm) = 176.08, 175.78, 159.73, 159.62, 157.36, 152.23, 147.73, 146.43, 146.02, 145.72, 141.05, 137.79, 137.76, 135.20, 132.52, 131.84, 122.04, 97.87, 20.30, 18.03, 16.58.; *m/z* (ESI<sup>+</sup>) = 704.61 [Fe<sub>4</sub>(Zn-L)<sub>6</sub>]<sup>8+</sup>, 813.75 [Zn-L - 1 pyridine]<sup>+</sup>, 900.52 [Zn-L]<sup>+</sup>, 989.55 [Fe<sub>4</sub>(Zn-L)<sub>6</sub>]<sup>6+</sup>, 1217.03 [Fe<sub>4</sub>L<sub>6</sub>]<sup>5+</sup>; Elemental analysis calc. (%) for C<sub>344</sub>H<sub>312</sub>F<sub>24</sub>Fe<sub>4</sub>N<sub>48</sub>O<sub>24</sub>S<sub>8</sub>Zn<sub>6</sub> x 12H<sub>2</sub>O = calc. C 58.63, H 4.81, N 9.54, found: C 58.50, H 4.64, N 9.52; DOSY NMR (CD<sub>3</sub>CN, 298 K): logD = -9.41, *r<sub>h</sub>* ≈ 1.6 nm.

Stokes-Einstein Equation for the estimation of sphere hydrodynamic radius:

$$D = \frac{kT}{6\pi\eta R} \quad T = 298 \text{ K}; k = 1.38 \times 10^{-23} \text{ N m K}^{-1}; \eta = 3.57 \times 10^{-4} \text{ N s m}^{-2[7]}$$

$$r_h = (k * T) / (6 * \pi * \eta * D)$$

For **Fe<sub>4</sub>(Zn-L)<sub>6</sub>**,  $D = 10^{-9.41} \text{ m}^2 \text{ s}^{-1}$ ,  $r_h \approx 1.6 \text{ nm}$

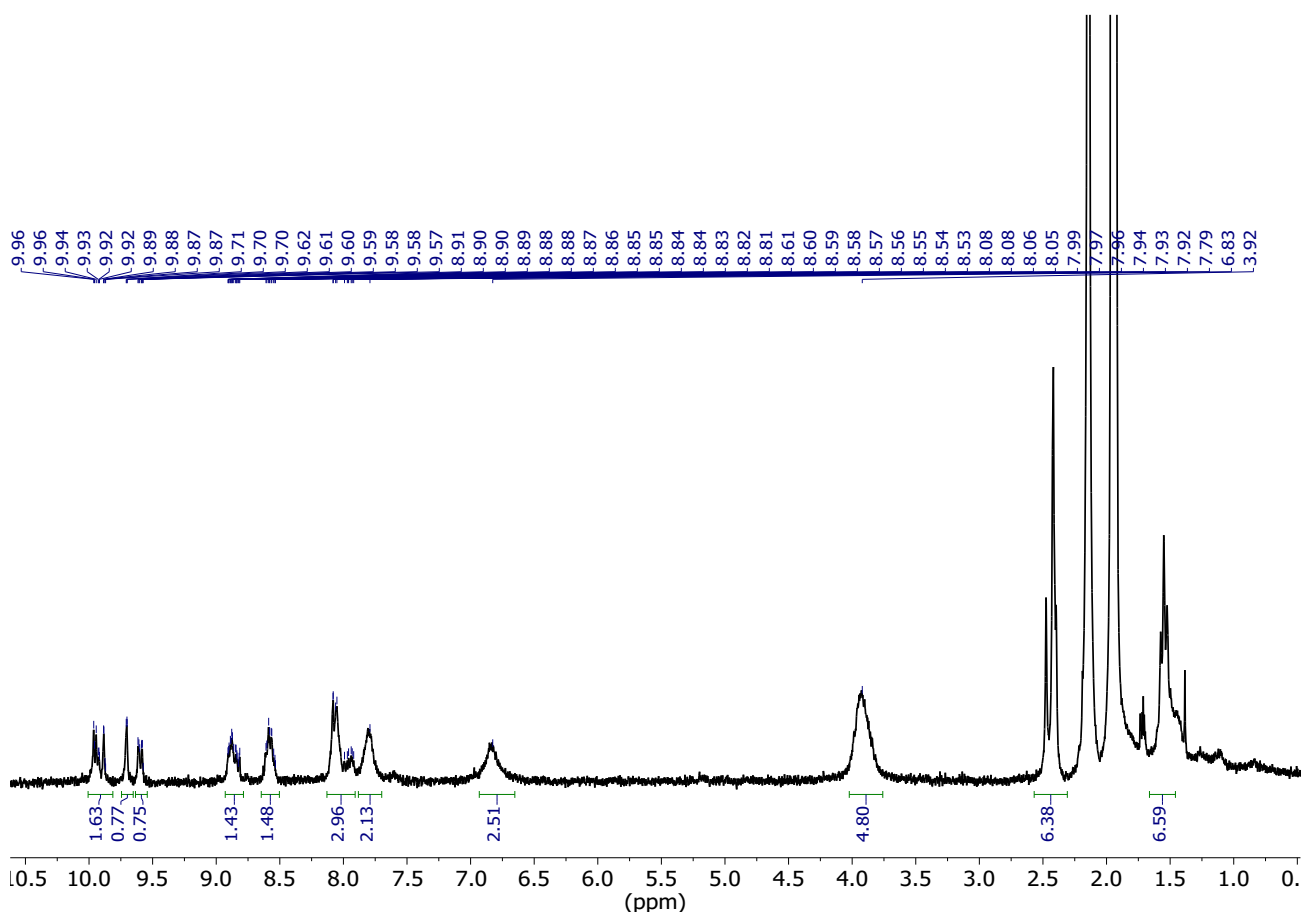

**Figure S 14.** <sup>1</sup>H NMR (300 MHz, 298 K) of **Fe<sub>4</sub>(Zn-L)<sub>6</sub>** in CD<sub>3</sub>CN.

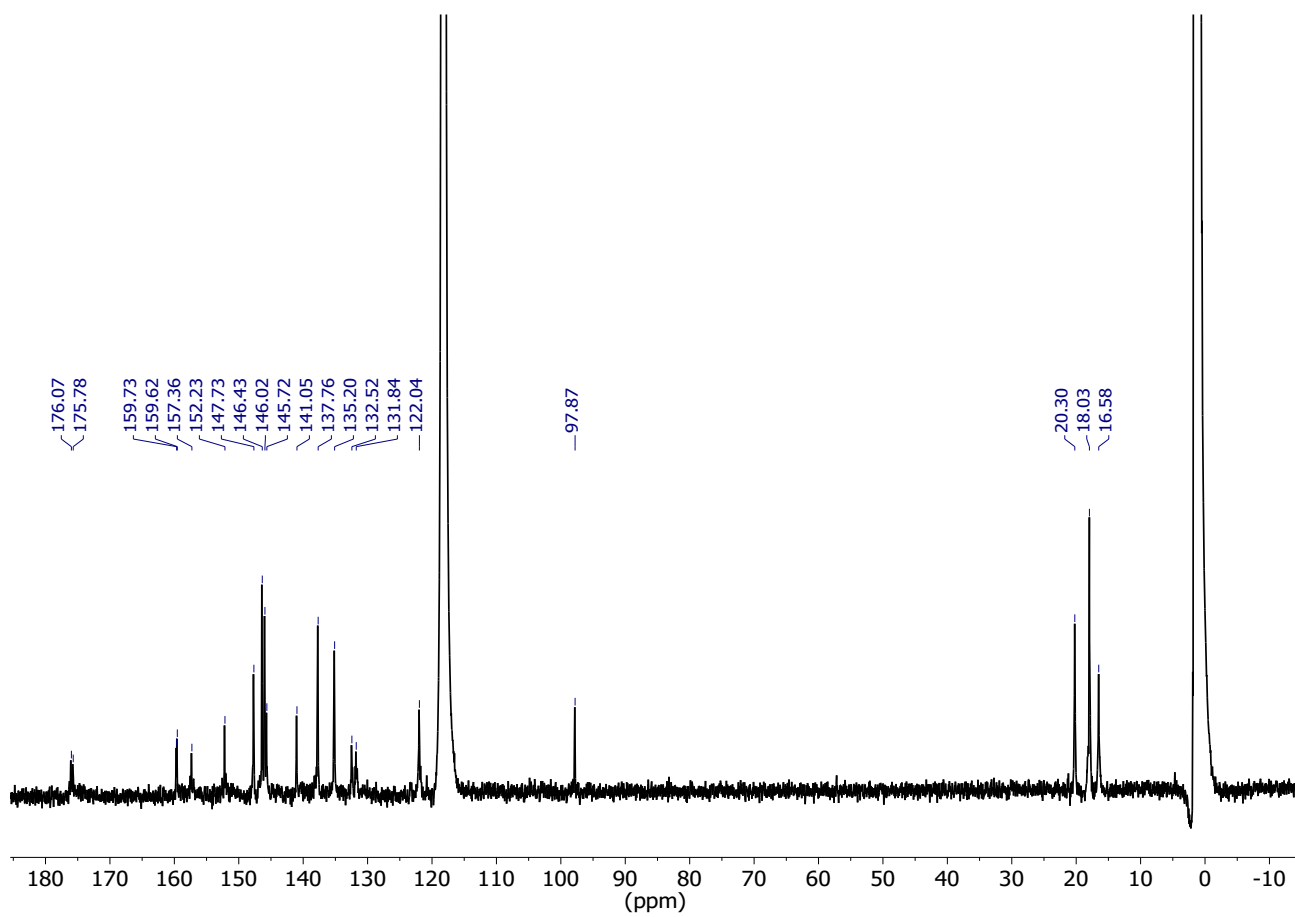

Figure S 15.  $^{13}\text{C}$  NMR (126 MHz, 298 K) of  $\text{Fe}_4(\text{Zn-L})_6$  in  $\text{CD}_3\text{CN}$ .

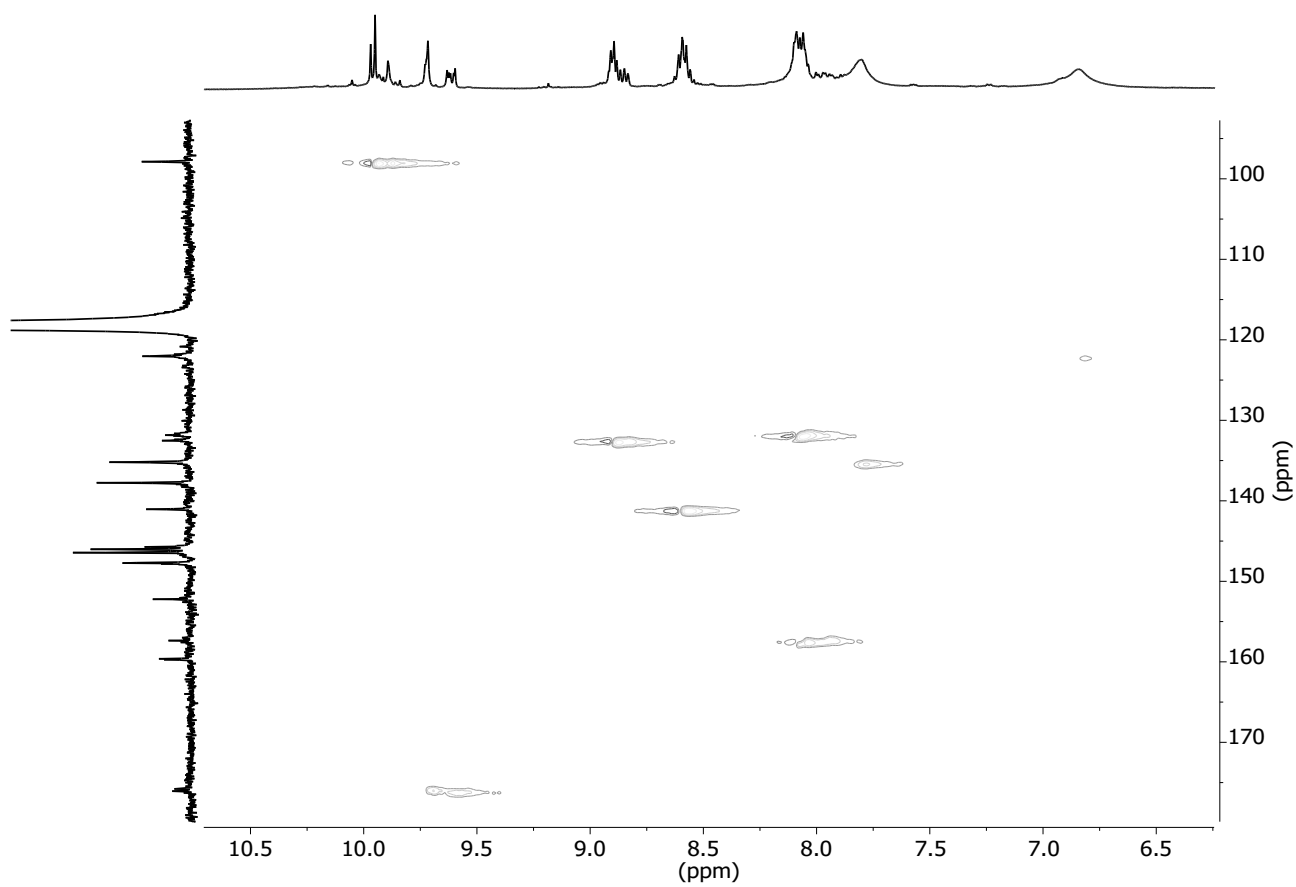

Figure S 16. Aromatic region of the HSQC (126 MHz, 298 K) spectrum of  $\text{Fe}_4(\text{Zn-L})_6$  in  $\text{CD}_3\text{CN}$ .

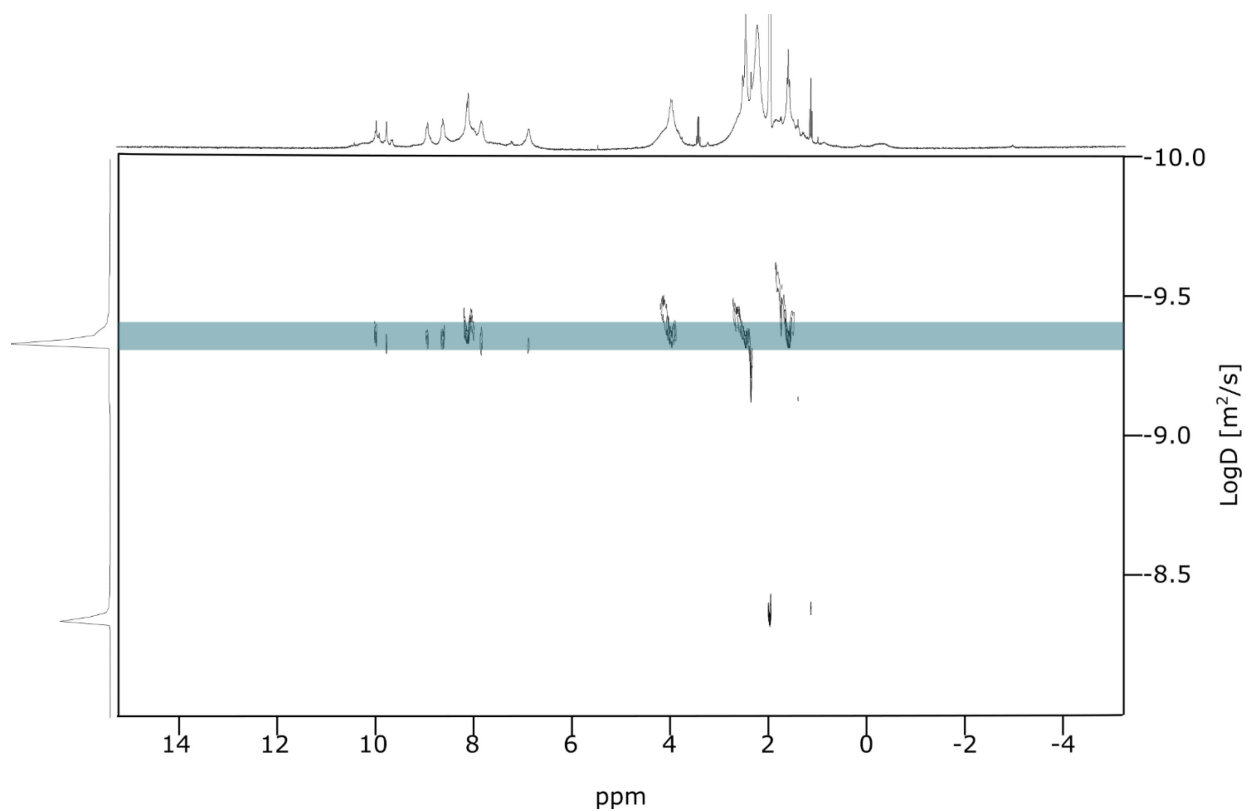

Figure S 17. 2D  $^1\text{H}$  DOSY (298 K) of  $\text{Fe}_4(\text{Zn-L})_6$  in  $\text{CD}_3\text{CN}$ .

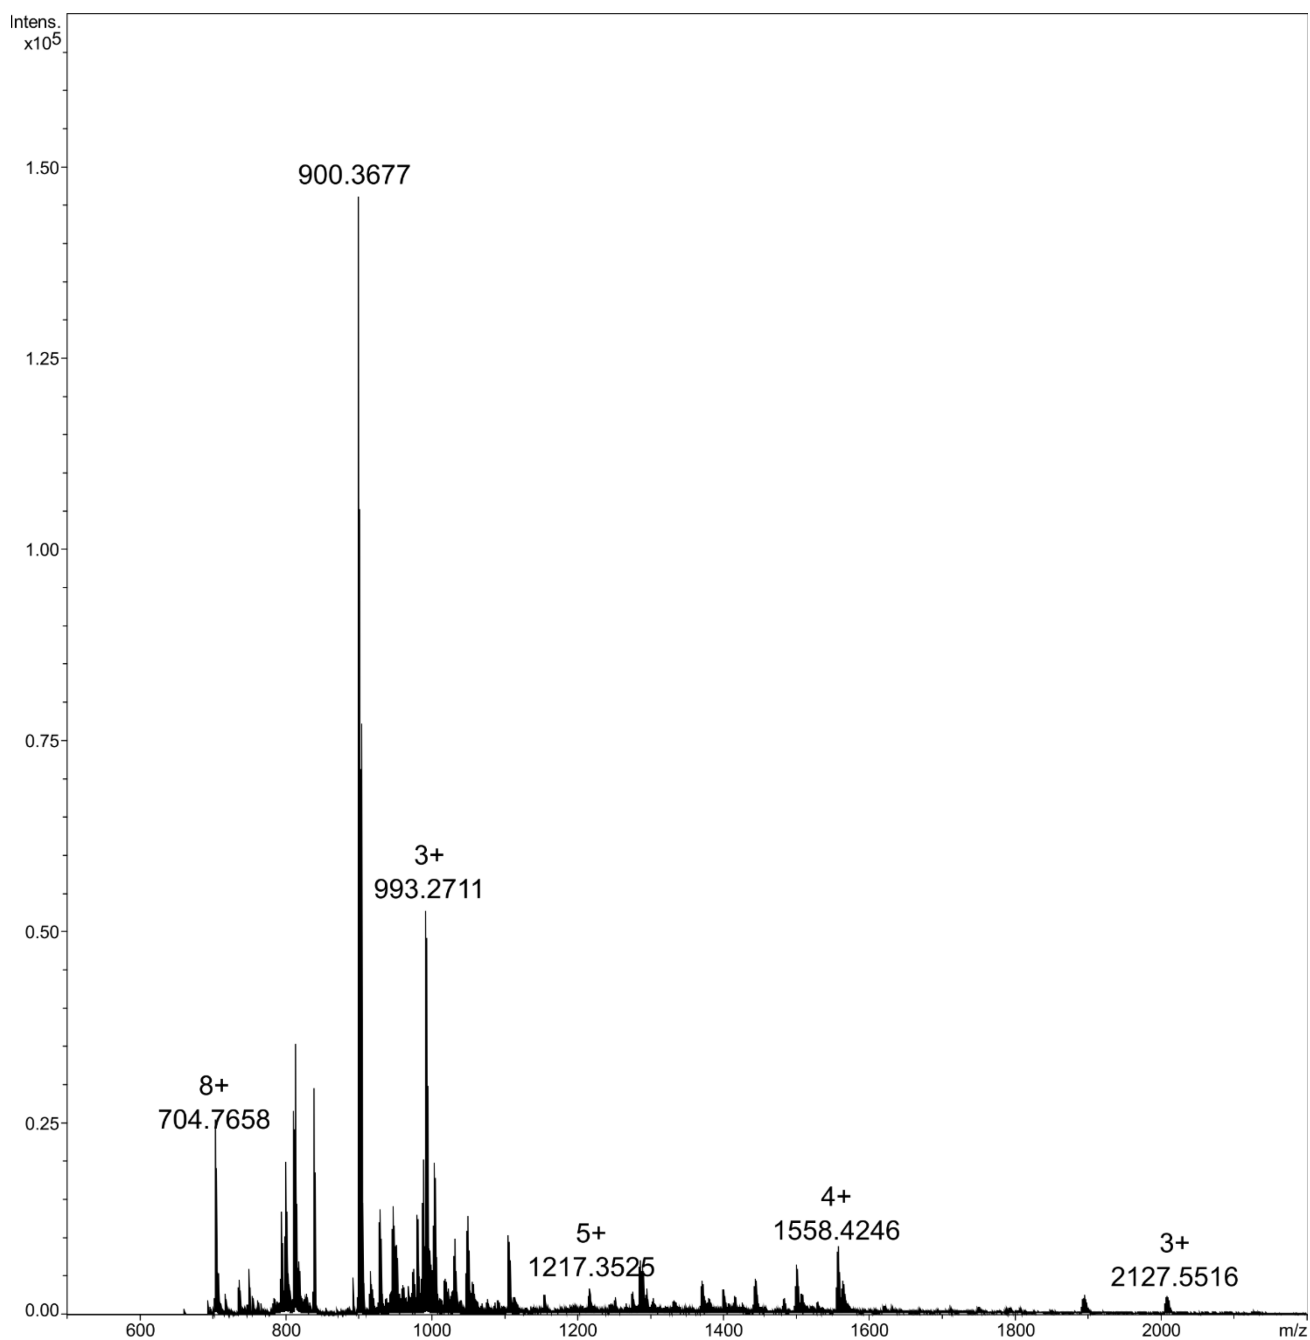

**Figure S 18.** CSI mass spectrum (full spectrum) of the sphere  $\text{Fe}_4(\text{Zn-L})_6$  with a spray temperature of  $-40$  °C and a dry gas temperature of  $-35$  °C. The peak with  $m/z$  ratio of 900.3677 belongs to a single ligand of the cage.

**Table S 1.** Different charged species observed in the CSI mass spectrum of the sphere  $\text{Fe}_4(\text{Zn-L})_6$  and the corresponding found and calculated [m/z].

| Species                                    | Charge | Found [m/z] | Calculated [m/z] |
|--------------------------------------------|--------|-------------|------------------|
| $\text{Fe}_4(\text{Zn-L})_6(\text{OTf})_0$ | 8+     | 704.7655    | 704.7376         |
| $\text{Fe}_4(\text{Zn-L})_6(\text{OTf})_1$ | 7+     | 826.7179    | 826.6934         |
| $\text{Fe}_4(\text{Zn-L})_6(\text{OTf})_2$ | 6+     | 989.3071    | 989.3010         |
| $\text{Fe}_4(\text{Zn-L})_6(\text{OTf})_3$ | 5+     | 1216.9523   | 1216.9517        |
| $\text{Fe}_4(\text{Zn-L})_6(\text{OTf})_4$ | 4+     | 1558.4243   | 1558.4278        |
| $\text{Fe}_4(\text{Zn-L})_6(\text{OTf})_5$ | 3+     | 2127.5516   | 2127.5546        |

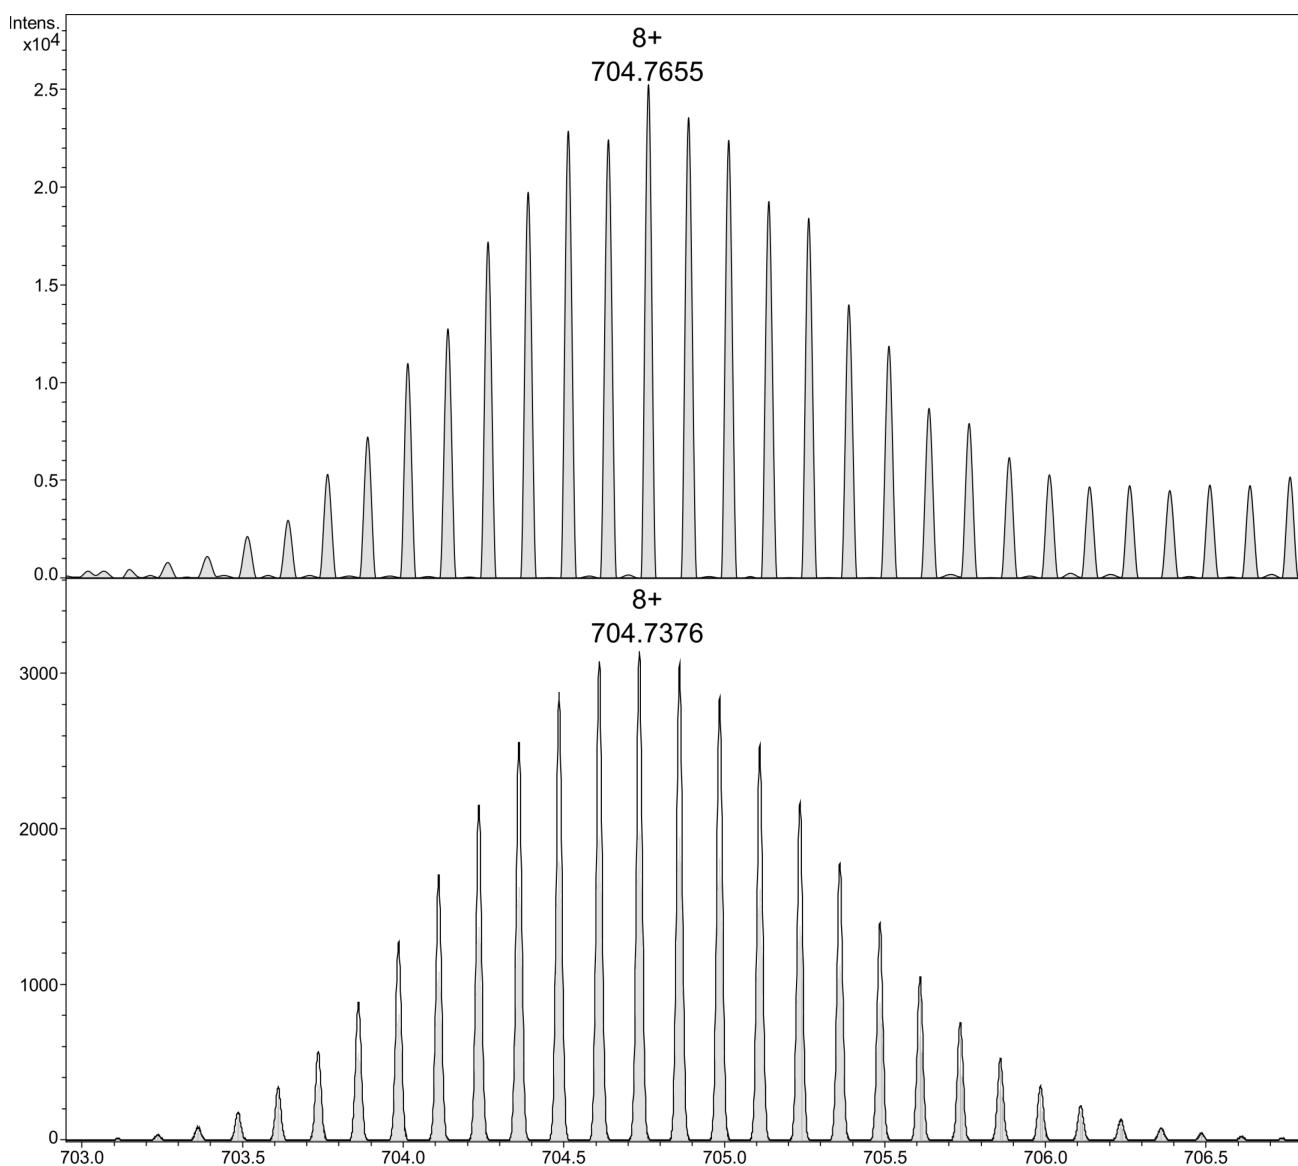

**Figure S 19.** Expanded spectrum for the charged species  $[\text{Fe}_4(\text{Zn-L})_6(\text{OTf})_0]^{8+}$  observed (above) in the CSI mass spectrum of the sphere  $\text{Fe}_4(\text{Zn-L})_6$  and simulated isotopic distribution (below).

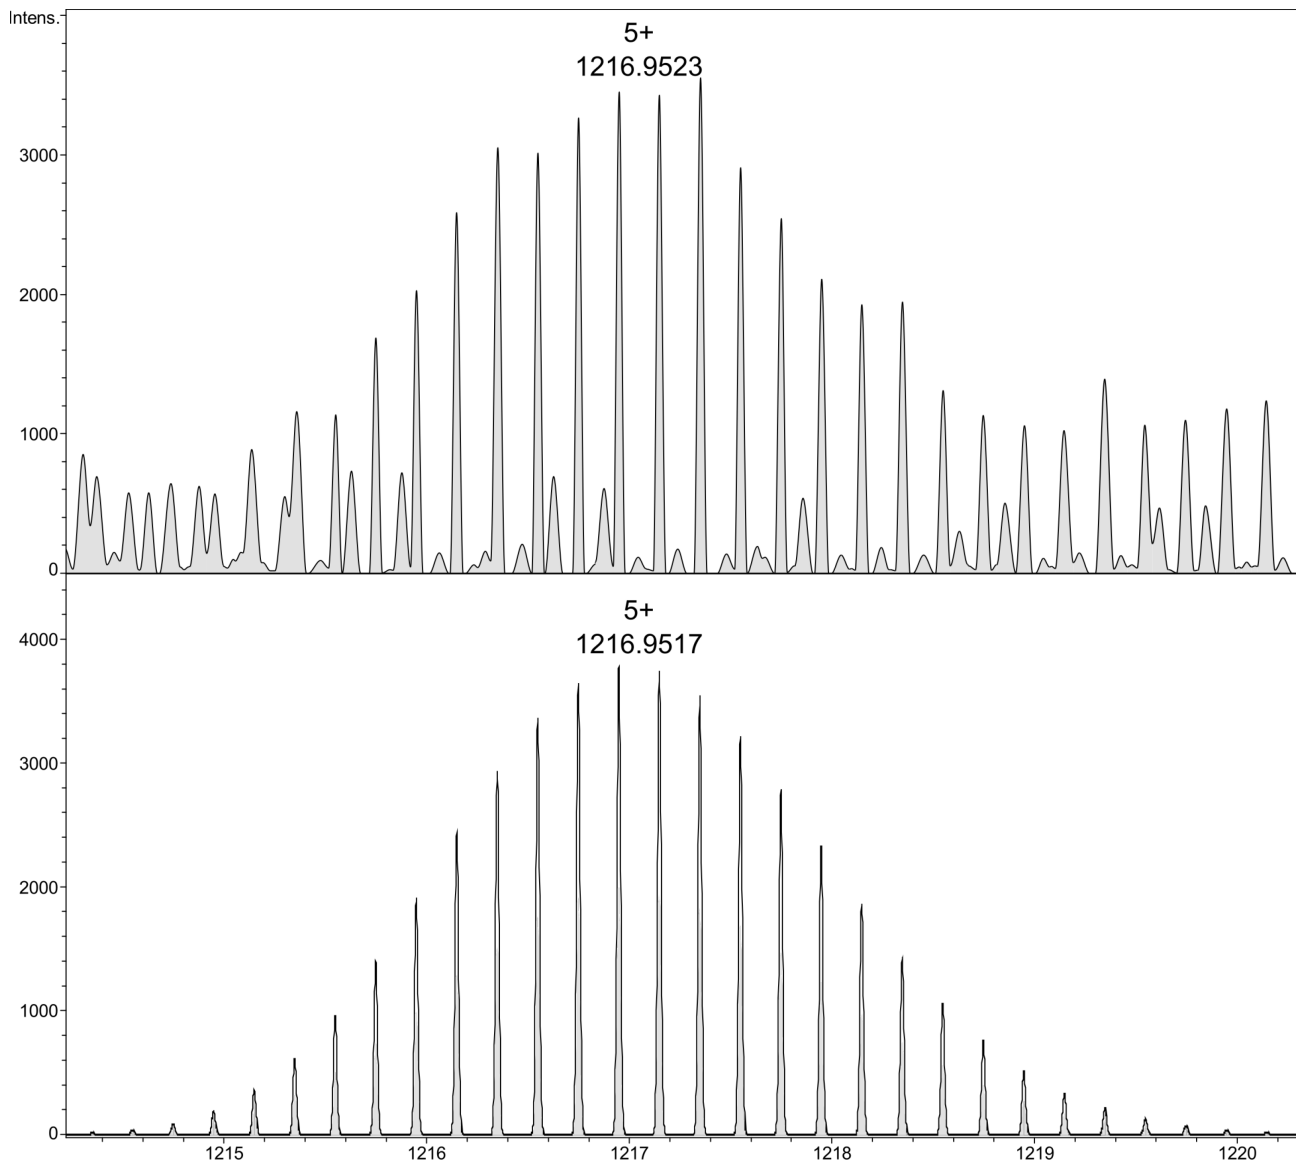

**Figure S 20.** Expanded spectrum for the charged species  $[Fe_4(Zn-L)_6(OTf)_3]^{5+}$  observed (above) in the CSI mass spectrum of the sphere  $Fe_4(Zn-L)_6$  and simulated isotopic distribution (below).

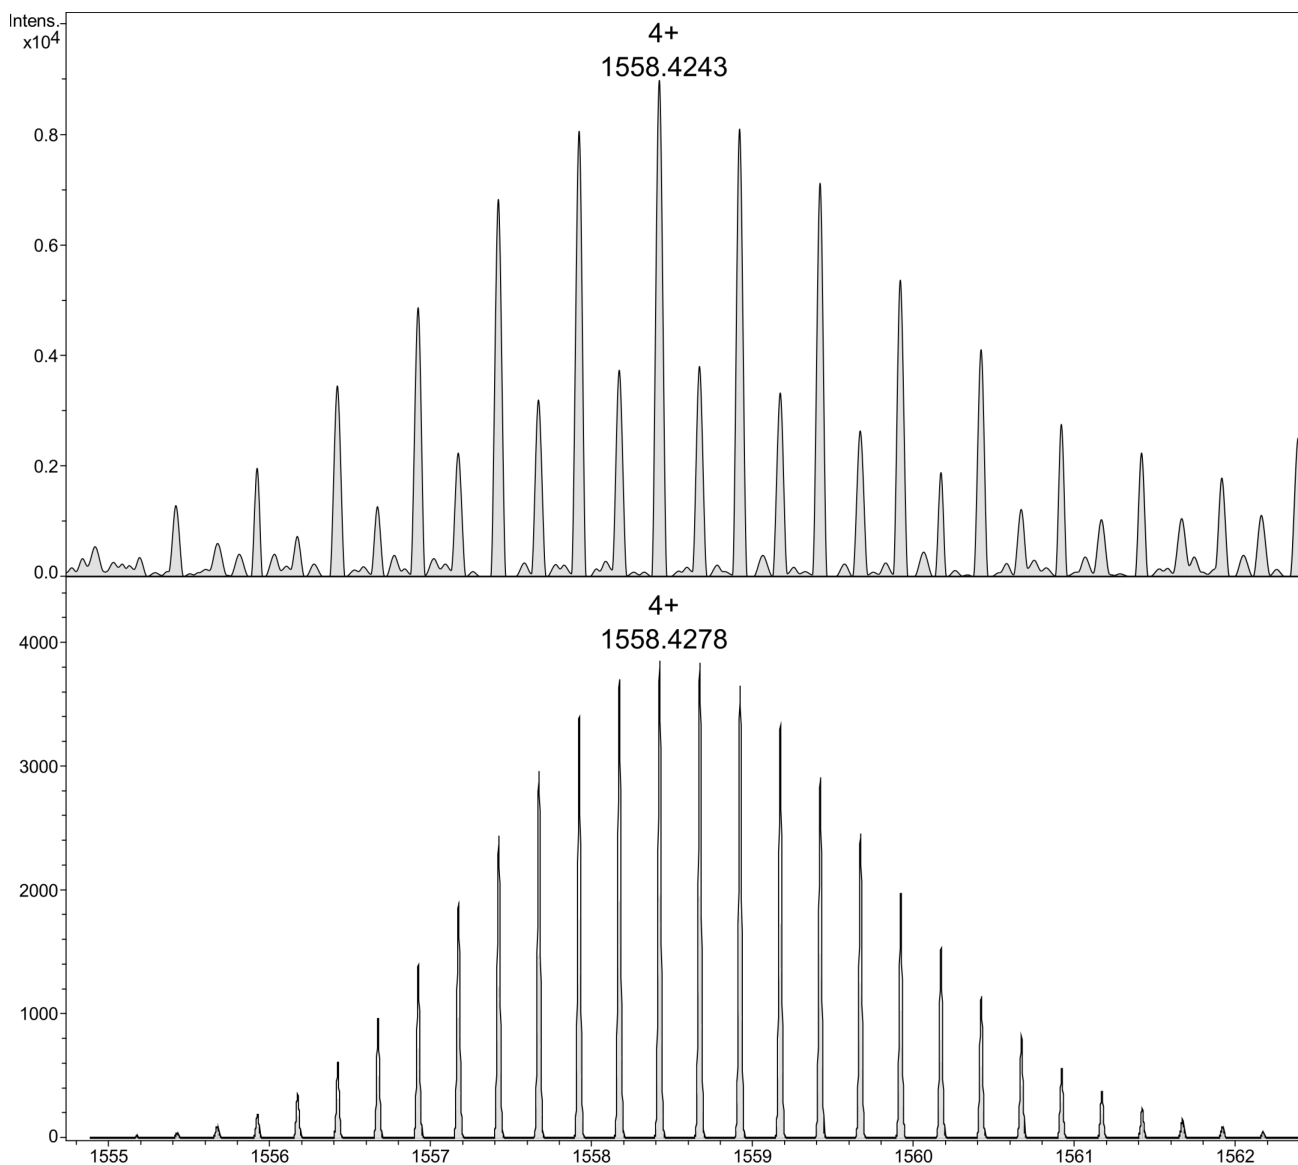

**Figure S 21.** Expanded spectrum for the charged species  $[\text{Fe}_4(\text{Zn-L})_6(\text{OTf})_4]^{4+}$  observed (above) in the CSI mass spectrum of the sphere  $\text{Fe}_4(\text{Zn-L})_6$  and simulated isotopic distribution (below). The difference in intensity between the peaks in the experimental spectrum are due to a symmetrical fragmentation of the cage in two.

## 6. Synthesis and characterisation of substrate Sub1

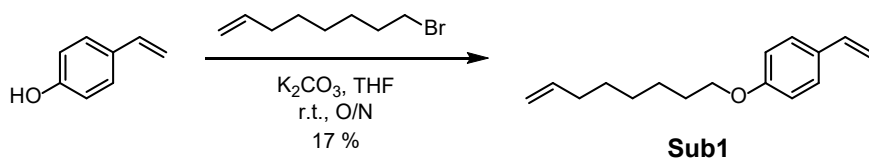

$\text{K}_2\text{CO}_3$  (0.53 g, 3.8 mmol) was transferred into a flame-dried schlenk flask under  $\text{N}_2$ . Dry tetrahydrofuran (100 mL) along with 4-vinylphenol (2.58 mL, 2.23 mmol, 10% solution in propylene glycol) were added. The solution was allowed to stir at room temperature for 30 min, where after 8-bromo-1-octene (0.45 mL, 2.68 mmol) was added dropwise and the solution was further stirred overnight. The next day the



solvent was removed under vacuum and the yellow residue was dissolved in dichloromethane and the undissolved salts were removed by filtration. The solvent was removed and the resulting crude yellow oil was purified with column chromatography (silica, eluent: dichloromethane/hexane = 1:2) to give **Sub1** as a pale yellow oil in 17% yield.  $^1\text{H NMR}$  (400 MHz,  $\text{CD}_2\text{Cl}_2$ )  $\delta$  (ppm) = 7.33 (d,  $J = 8.7$  Hz, 2H), 6.84 (d,  $J = 8.7$  Hz, 2H), 6.66 (dd,  $J = 17.6$  Hz, 10.9 Hz, 1H), 5.90 – 5.76 (m, 1H), 5.60 (dd,  $J = 17.6$  Hz, 1.1 Hz, 1H), 5.10 (dd,  $J = 10.9$  Hz, 1.0 Hz, 1H), 5.04 – 4.89 (m, 2H), 3.95 (t,  $J = 6.6$  Hz, 2H), 2.05 (t,  $J = 7.1$  Hz, 2H), 1.82 – 1.70 (m, 3H), 1.51 – 1.30 (m, 6H).

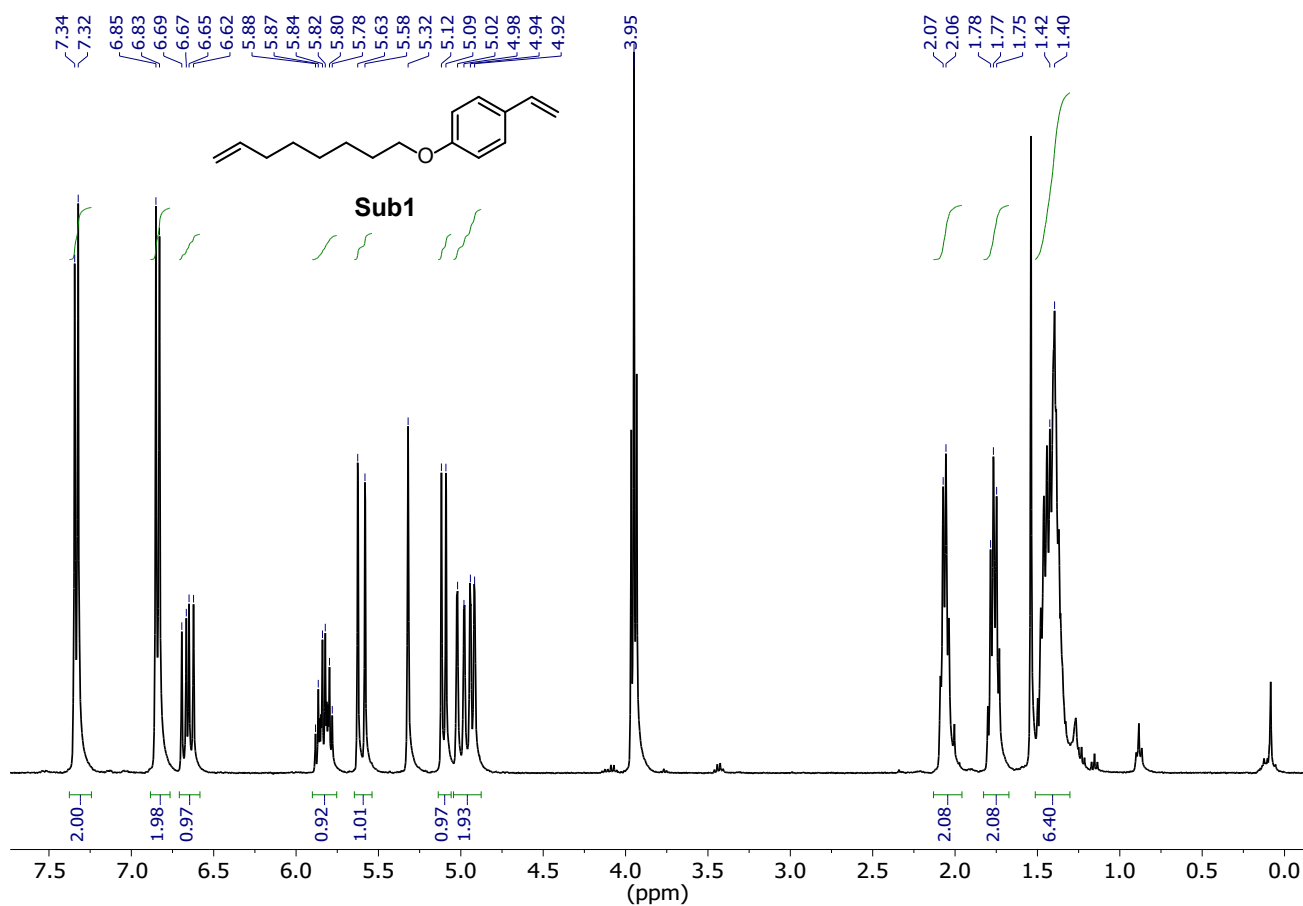

**Figure S 22.**  $^1\text{H NMR}$  (400 MHz, 298 K) of **Sub1** in  $\text{CD}_2\text{Cl}_2$ .

## 7. Binding studies of $\text{Fe}_4(\text{Zn-L})_6$ with various guests

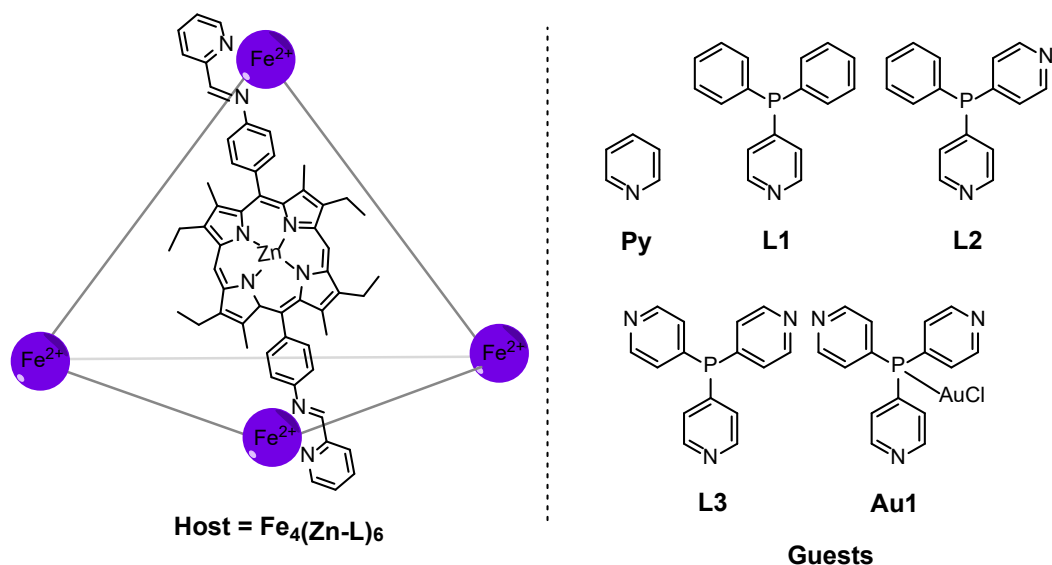

The binding affinities of  $\text{Fe}_4(\text{Zn-L})_6$  towards **Py**, **L1**, **L2**, **L3** and **Au1** were obtained by UV-vis titrations in acetonitrile. A solution of  $\text{Fe}_4(\text{Zn-L})_6$  in acetonitrile (solution **A**), and stock solutions of each guest containing the same concentration of host in acetonitrile (solution **B**) were prepared respectively. Aliquots of each guest from stock solution **B** were added to a quartz cuvette containing the solution **A**. Each titration was performed at 298 K. The progress of the titration was monitored by the shifts in the Q-bands of  $\text{Fe}_4(\text{Zn-L})_6$ . The general titration fitting procedure is described in Section 6.

### Uv-vis binding study of $\text{Fe}_4(\text{Zn-L})_6$ and **Py**:

**Table S 2.** Fitting results for the 1:1 host-guest system between  $\text{Fe}_4(\text{Zn-L})_6$  and **Py** in acetonitrile for  $K = 1.19 \times 10^3 \text{ M}^{-1}$  at 298 K.

| Wavelength [nm] | $\epsilon_{\text{HG}} / 10^4$ | $R^2$ |
|-----------------|-------------------------------|-------|
| 544             | 1.75                          | 0.91  |
| 550             | 1.92                          | 0.94  |
| 578             | 0.69                          | 0.93  |

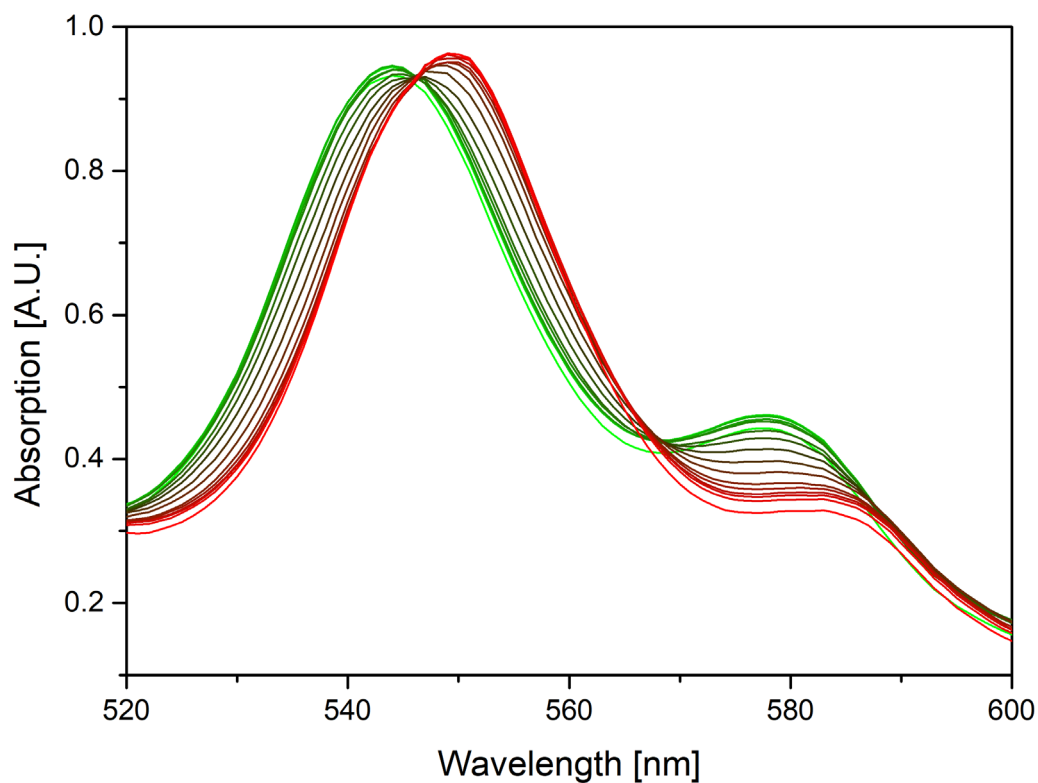

**Figure S 23.** Overlay of UV-vis spectra of the titration of  $\text{Fe}_4(\text{Zn-L})_6$  (host) with **Py** (guest), at a fixed host concentration of  $8.4 \mu\text{M}$  in acetonitrile at 298 K.

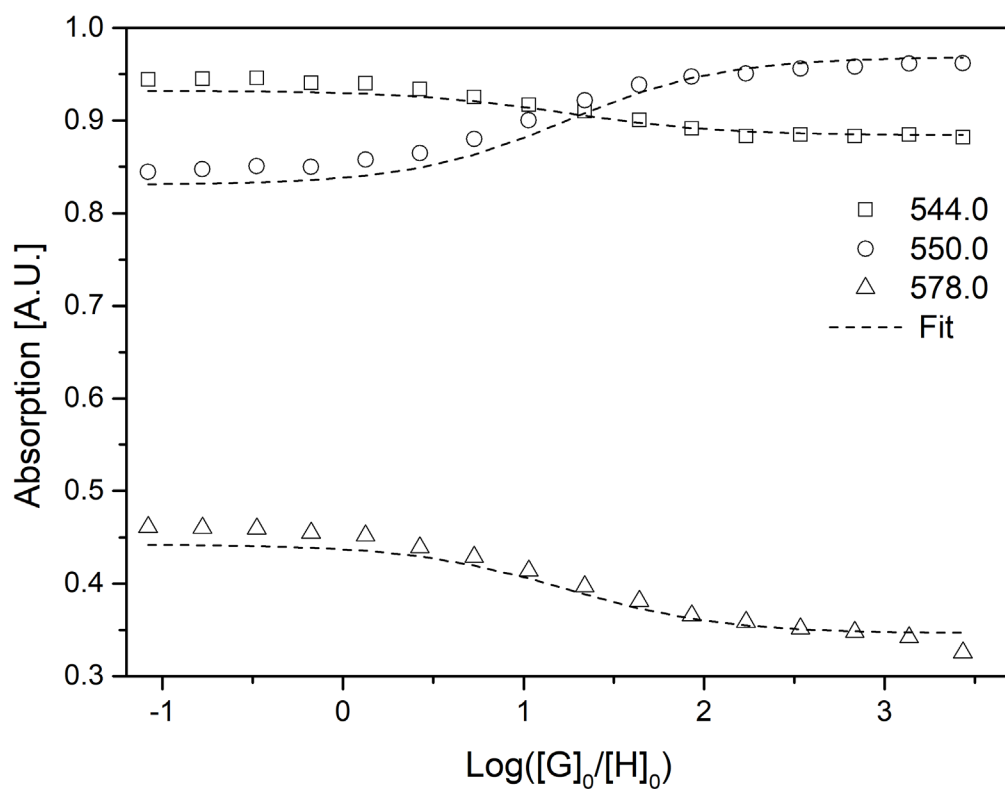

**Figure S 24.** Fitted UV-vis titration curves of  $\text{Fe}_4(\text{Zn-L})_6$  with **Py** in acetonitrile (298 K).

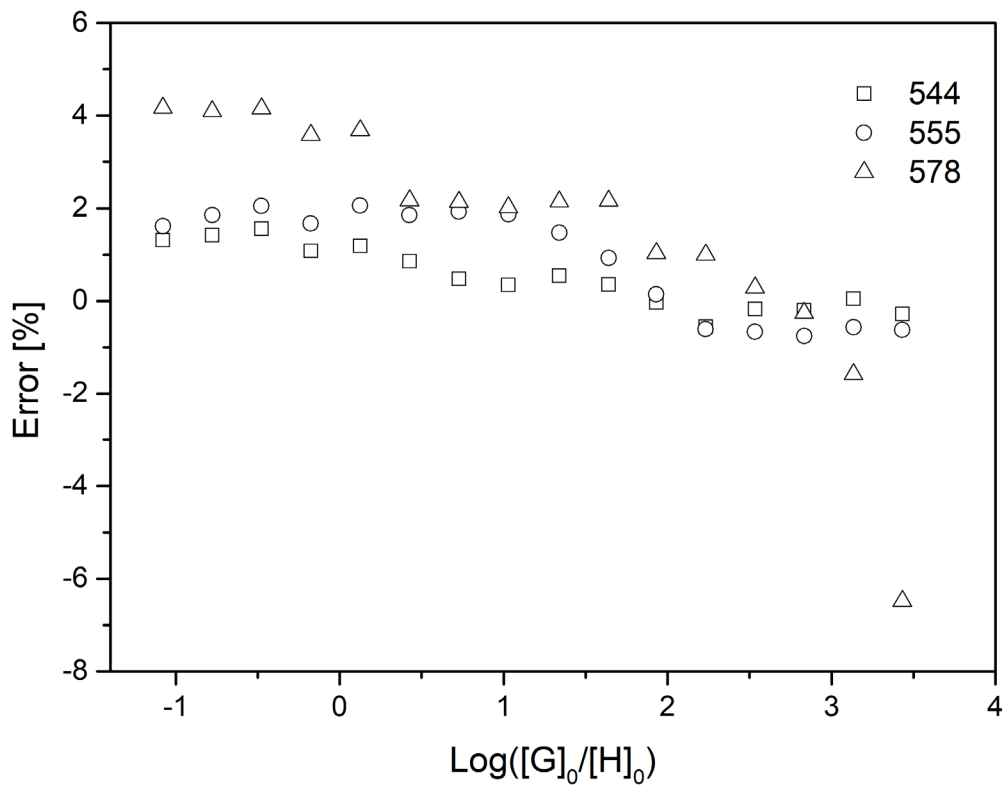

Figure S 25. The error distribution for the fitted curves of  $\text{Fe}_4(\text{Zn-L})_6$  with Py in acetonitrile (298 K).

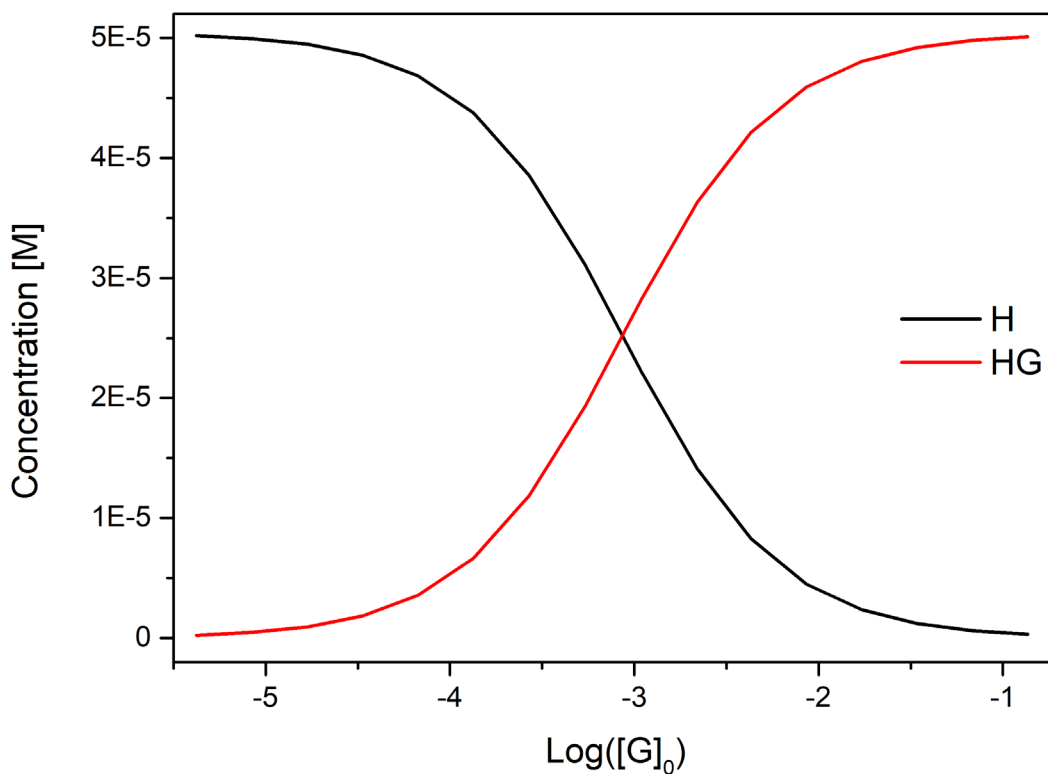

Figure S 26. Calculated species concentration of the titration of  $\text{Fe}_4(\text{Zn-L})_6$  with Py in acetonitrile (298 K).

### Uv-vis binding study of $\text{Fe}_4(\text{Zn-L})_6$ and L1 (HG binding model):

**Table S 3.** Fitting results for the 1:1 host-guest system between  $\text{Fe}_4(\text{Zn-L})_6$  and L1 in acetonitrile for  $K = 6.45 \times 10^3 \text{ M}^{-1}$  at 298 K.

| Wavelength [nm] | $\epsilon_{\text{HG}} / 10^4$ | $R^2$ |
|-----------------|-------------------------------|-------|
| 540             | 1.35                          | 0.93  |
| 555             | 1.56                          | 0.90  |
| 578             | 0.68                          | 0.98  |

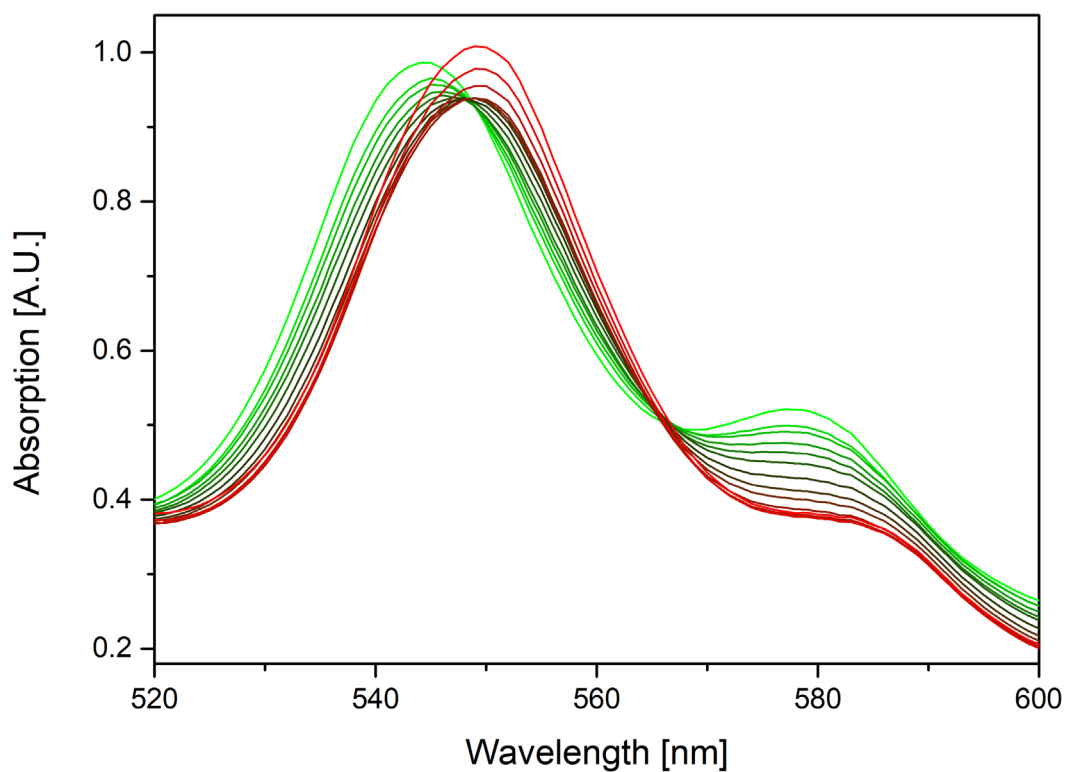

**Figure S 27.** Overlay of UV-vis spectra of the titration of  $\text{Fe}_4(\text{Zn-L})_6$  (host) with L1 (guest), at a fixed host concentration of  $9.2 \mu\text{M}$  in acetonitrile at 298 K.

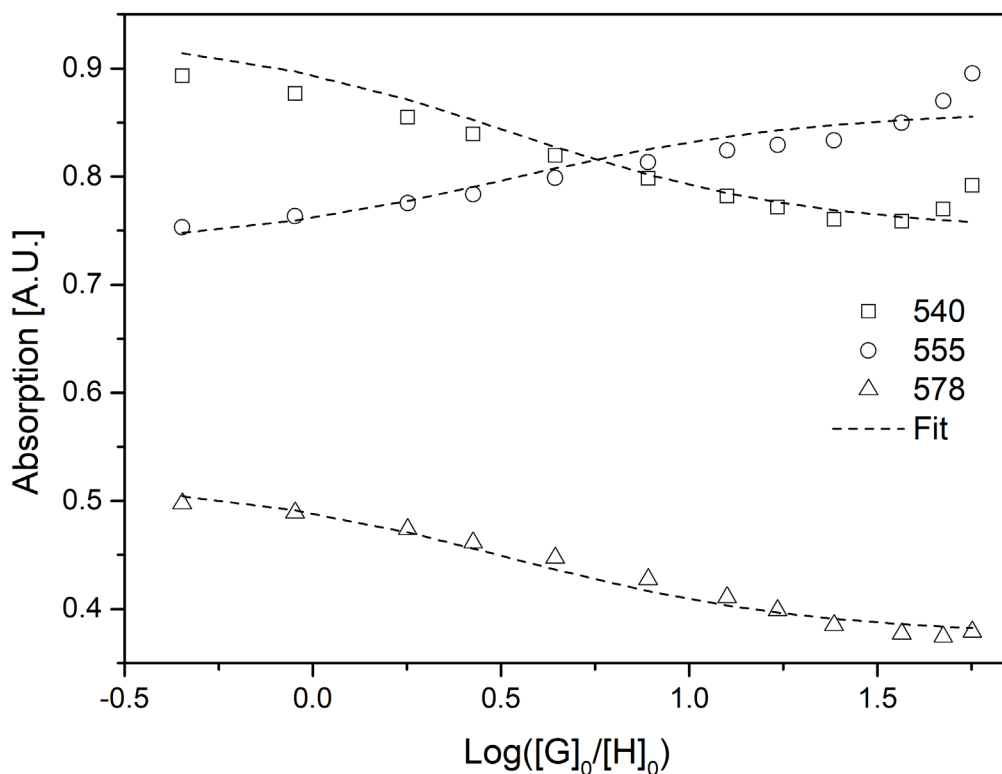

Figure S 28. Fitted UV-vis titration curves of  $\text{Fe}_4(\text{Zn-L})_6$  with **L1** in acetonitrile (298 K).

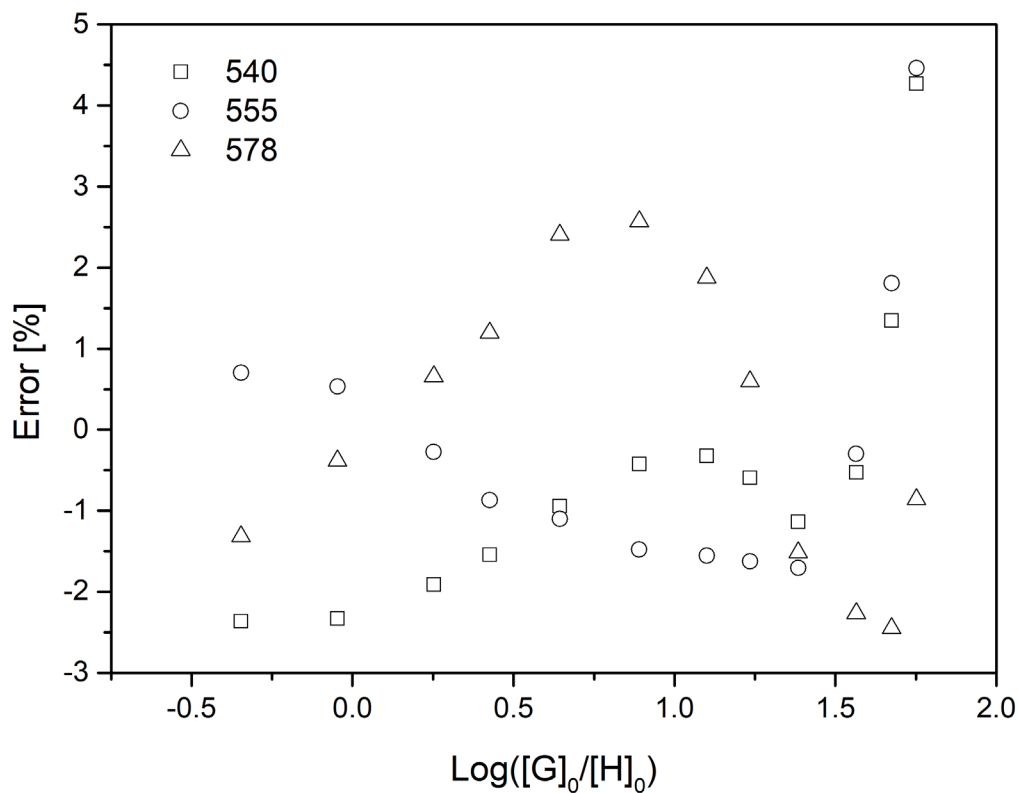

Figure S 29. The error distribution for the fitted curves of  $\text{Fe}_4(\text{Zn-L})_6$  with **L1** in acetonitrile (298 K).

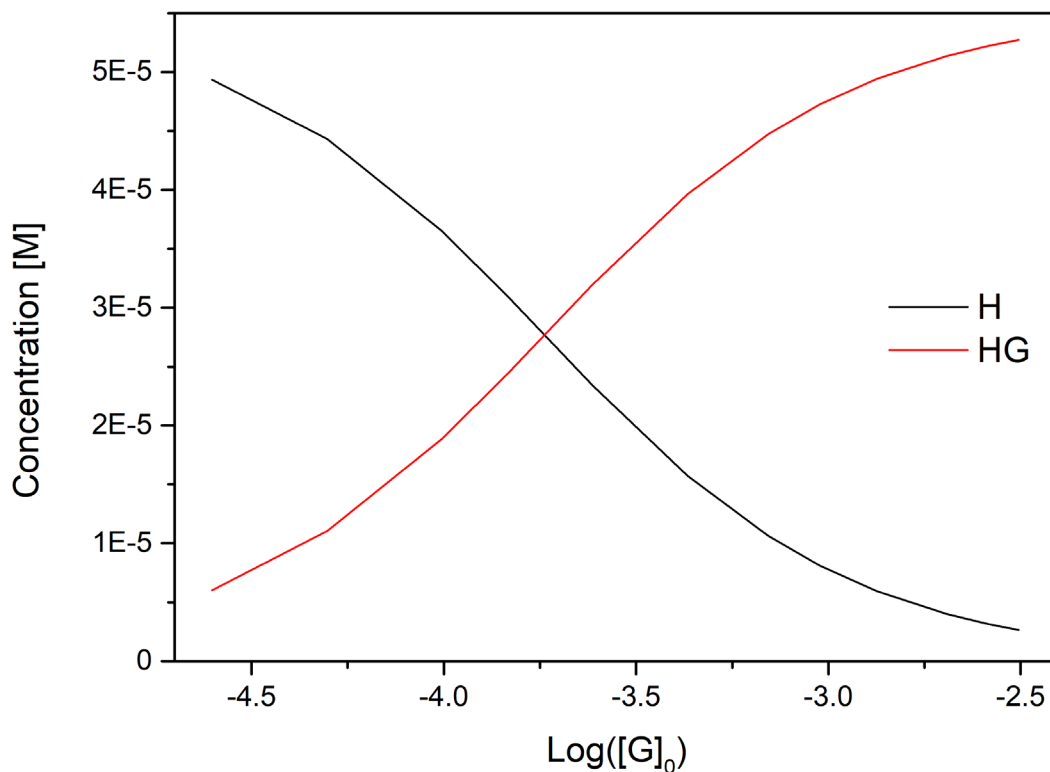

**Figure S 30.** Calculated species concentration of the titration of  $\text{Fe}_4(\text{Zn-L})_6$  with **L1** in acetonitrile (298 K).

**Uv-vis binding study of  $\text{Fe}_4(\text{Zn-L})_6$  and L1 (HGGG binding model):**

**Table S 4.** Fitting results for the 1:3 host-guest system between  $\text{Fe}_4(\text{Zn-L})_6$  and **L1** in acetonitrile for  $K = 2.53 \times 10^3 \text{ M}^{-1}$  at 298 K, where  $\alpha_1 = 0.54$  and  $\alpha_2 = 0.53$ .

| Wavelength [nm] | $\epsilon_{\text{HG}} / 10^4$ | $\epsilon_{\text{HGG}} / 10^4$ | $\epsilon_{\text{HGGG}} / 10^5$ | $R^2$ |
|-----------------|-------------------------------|--------------------------------|---------------------------------|-------|
| 540             | 8.33                          | 8.05                           | 0.87                            | 0.972 |
| 555             | 9.13                          | 8.21                           | 1.07                            | 0.986 |
| 578             | 5.63                          | 4.15                           | 0.39                            | 0.995 |

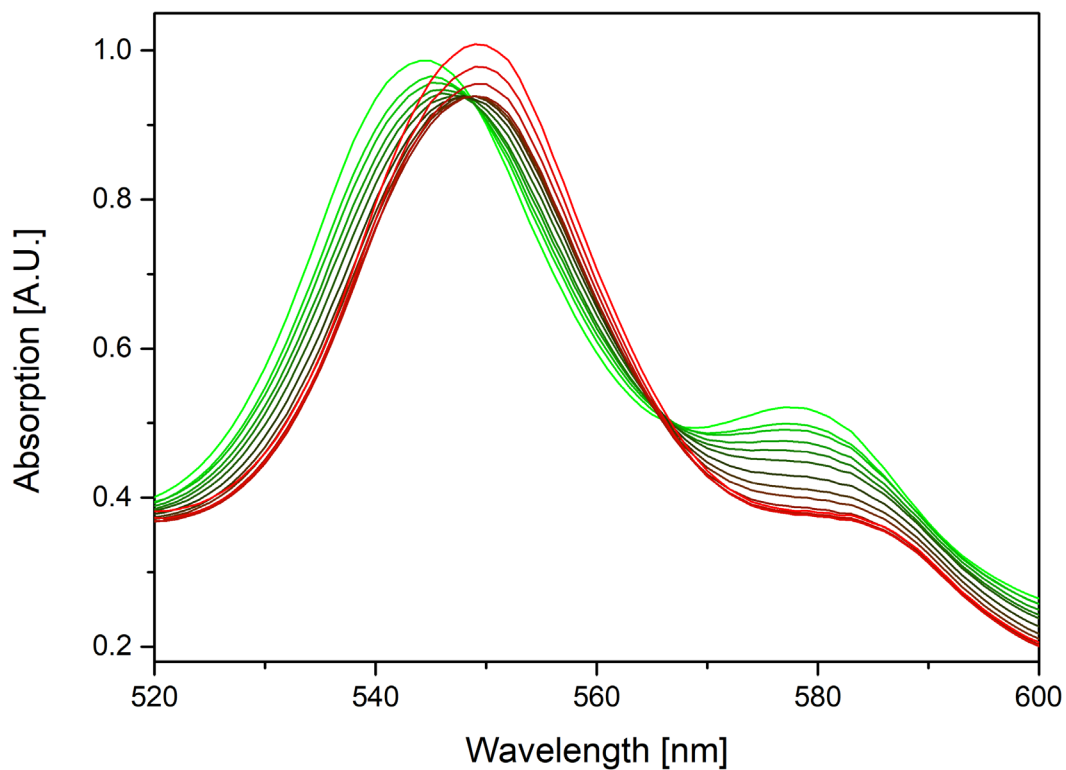

**Figure S 31.** Overlay of UV-vis spectra of the titration of  $\text{Fe}_4(\text{Zn-L})_6$  (host) with **L1** (guest), at a fixed host concentration of  $9.2 \mu\text{M}$  in acetonitrile at 298 K.

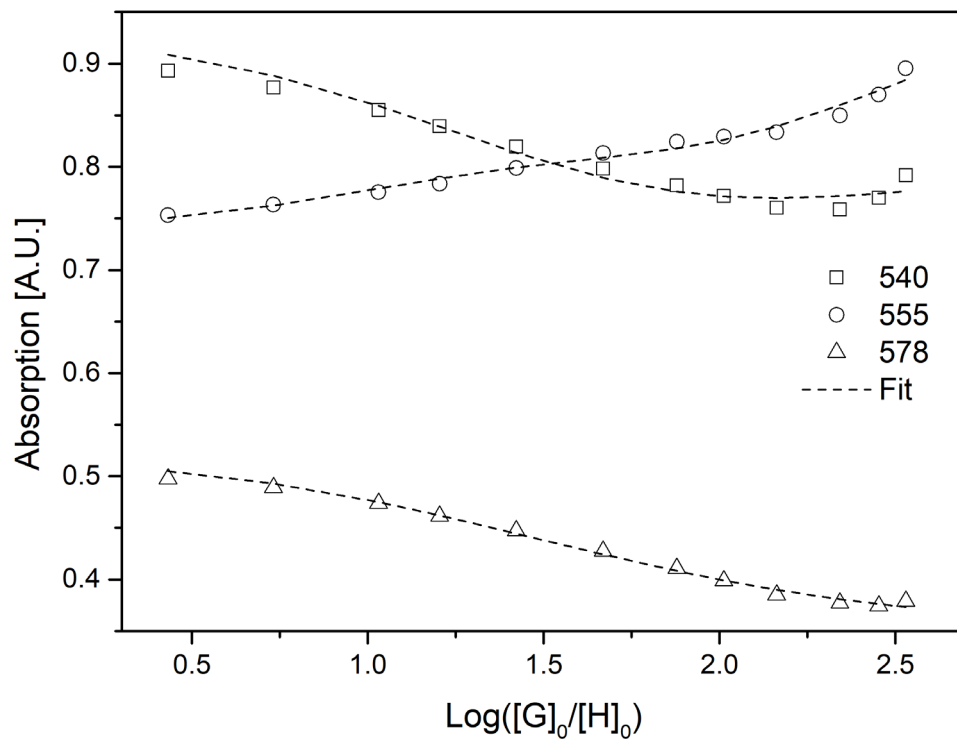

**Figure S 32.** Fitted UV-vis titration curves of  $\text{Fe}_4(\text{Zn-L})_6$  with **L1** in acetonitrile (298 K).



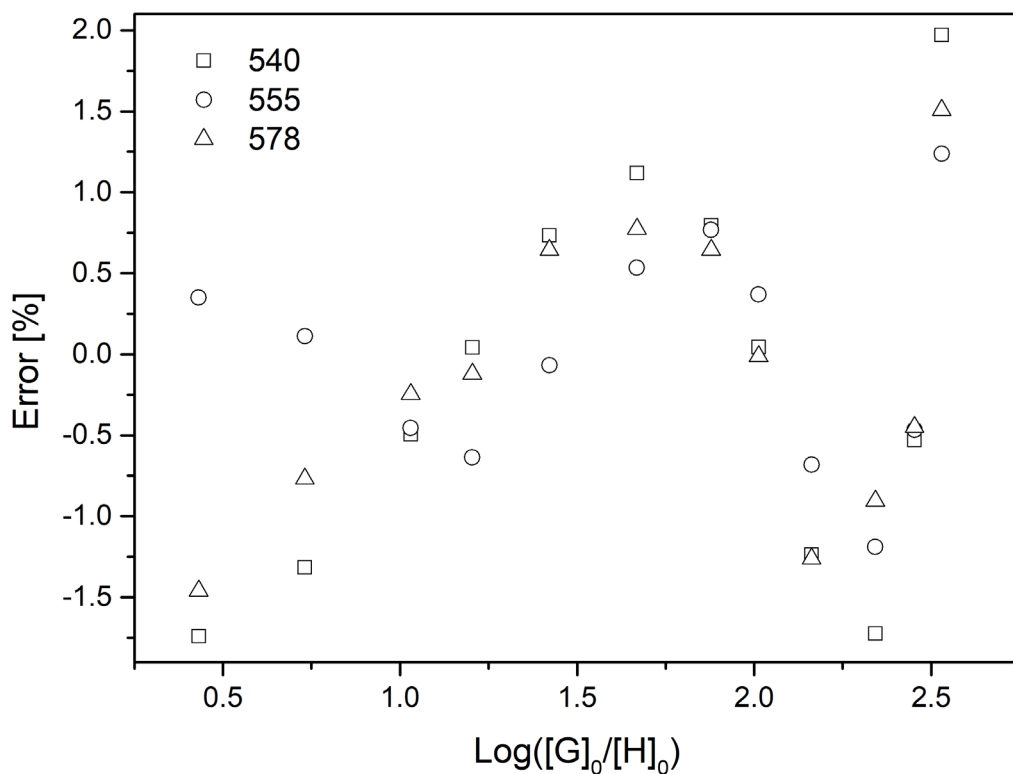

Figure S 33. The error distribution for the fitted curves of  $\text{Fe}_4(\text{Zn-L})_6$  with L1 in acetonitrile (298 K).

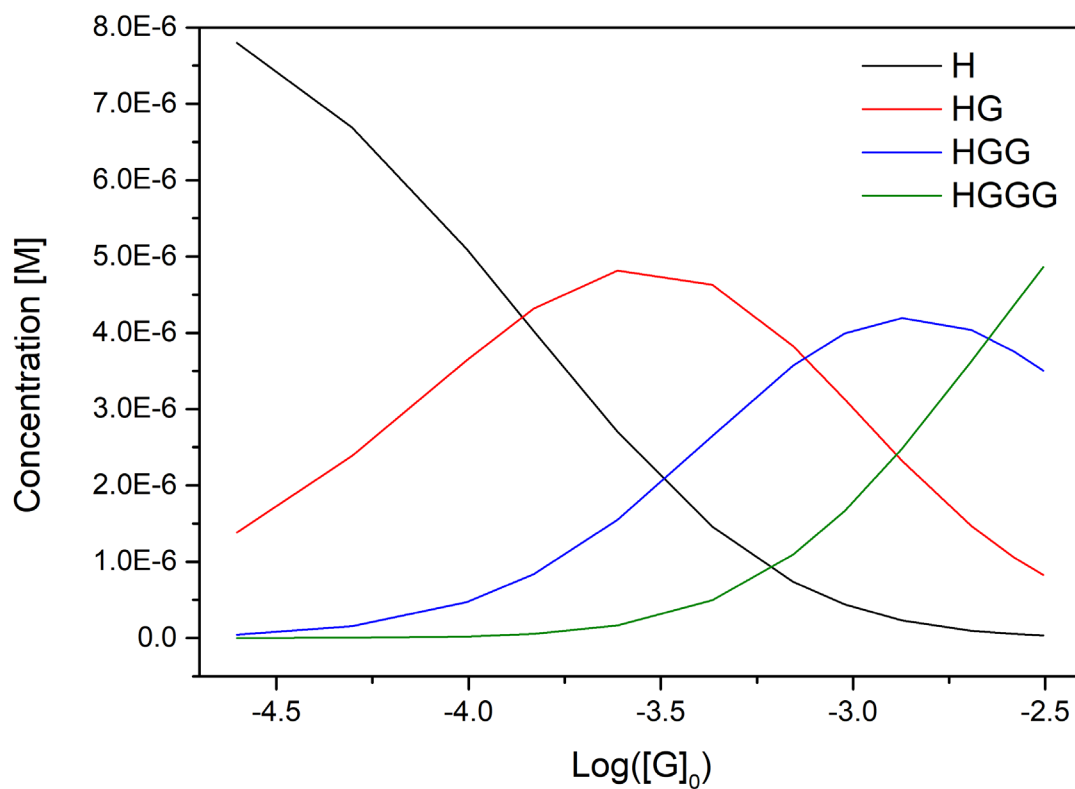

Figure S 34. Calculated species concentration of the titration of  $\text{Fe}_4(\text{Zn-L})_6$  with L1 in acetonitrile (298 K).

### Uv-vis binding study of $\text{Fe}_4(\text{Zn-L})_6$ and L2:

**Table S 5.** Fitting results for the 1:3 host-guest system between  $\text{Fe}_4(\text{Zn-L})_6$  and L2 in acetonitrile for  $K = 1.72 \times 10^5 \text{ M}^{-1}$  at 298 K, where  $\alpha_1 = 0.39$  and  $\alpha_2 = 0.02$ .

| Wavelength [nm] | $\epsilon_{\text{HG}} / 10^4$ | $\epsilon_{\text{HGG}} / 10^4$ | $\epsilon_{\text{HGGG}} / 10^5$ | $R^2$ |
|-----------------|-------------------------------|--------------------------------|---------------------------------|-------|
| 540             | 9.43                          | 8.80                           | 0.90                            | 0.97  |
| 555             | 9.14                          | 8.96                           | 1.13                            | 0.99  |
| 578             | 4.41                          | 4.20                           | 0.34                            | 0.98  |

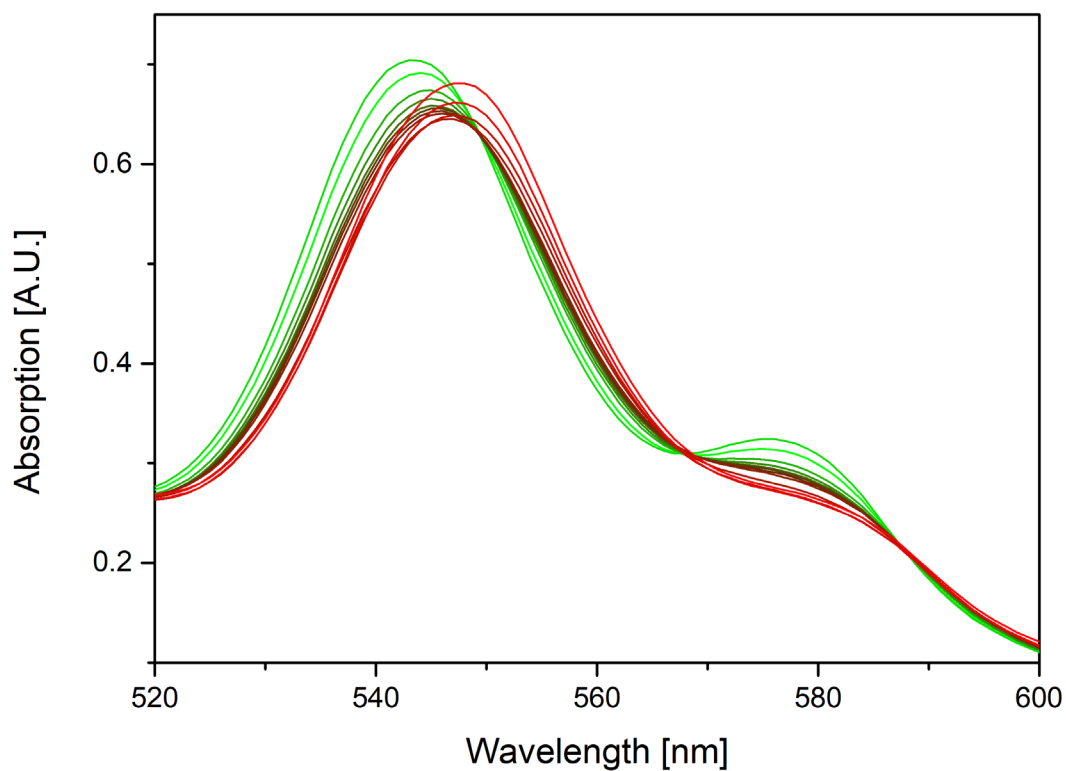

**Figure S 35.** Overlay of UV-vis spectra of the titration of  $\text{Fe}_4(\text{Zn-L})_6$  (host) with L2 (guest), at a fixed host concentration of  $6.3 \mu\text{M}$  in acetonitrile at 298 K.

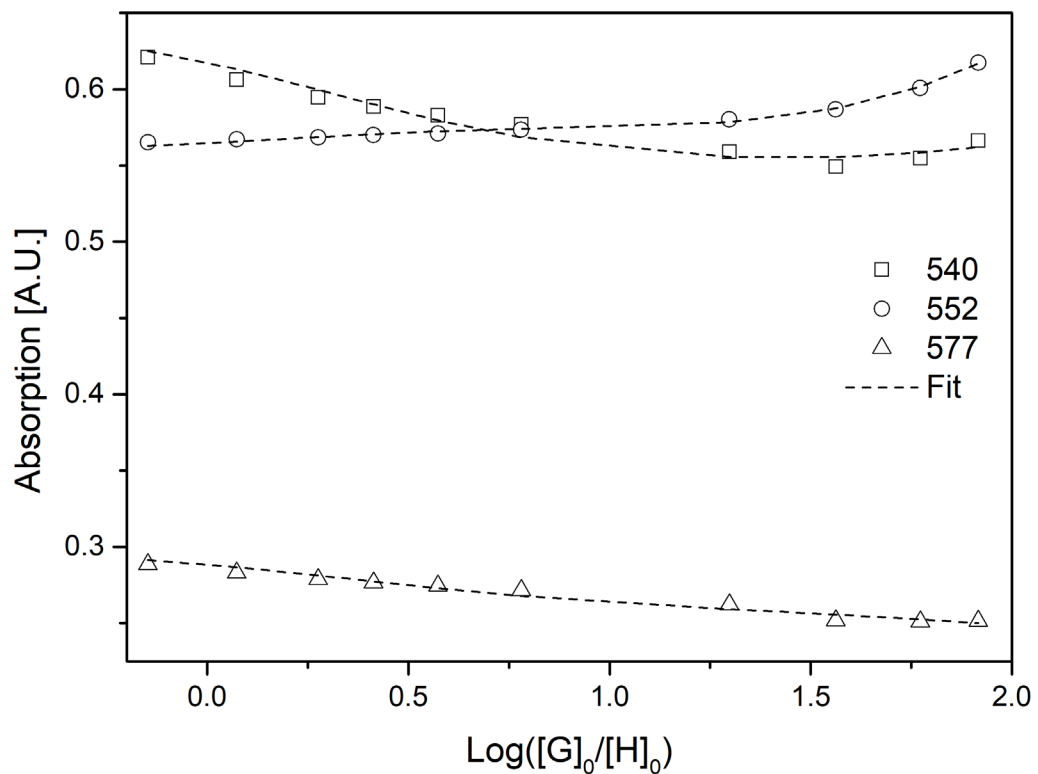

Figure S 36. Fitted UV-vis titration curves of  $\text{Fe}_4(\text{Zn-L})_6$  with **L2** in acetonitrile (298 K).

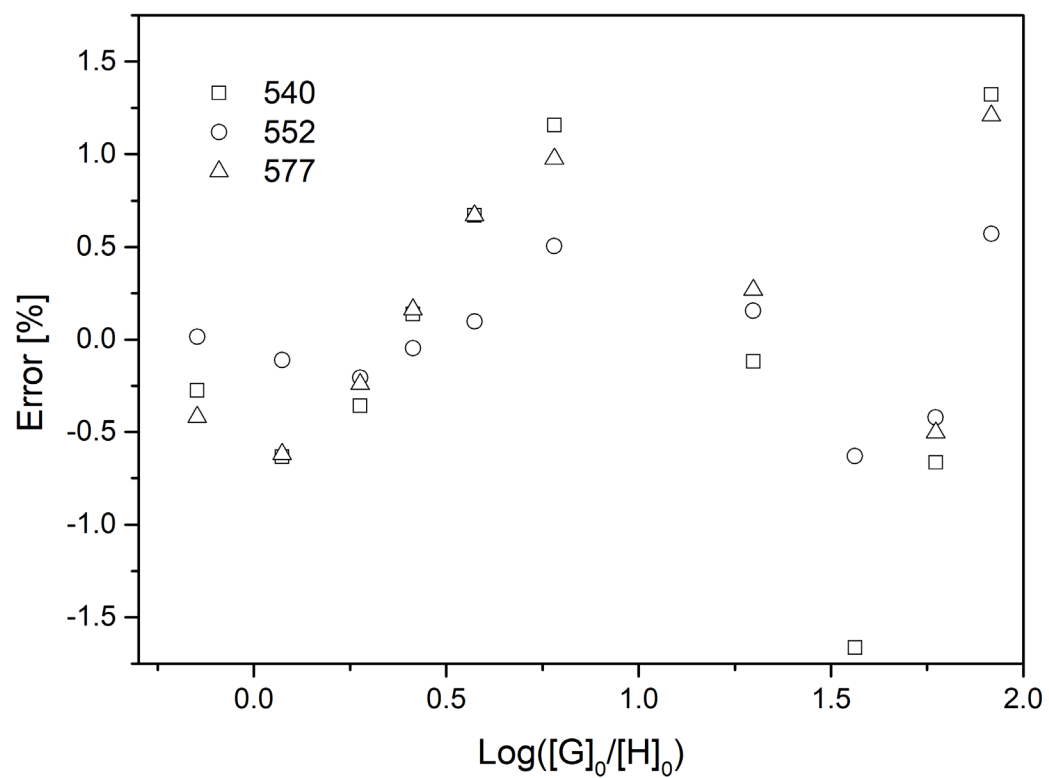

Figure S 37. The error distribution for the fitted curves of  $\text{Fe}_4(\text{Zn-L})_6$  with **L2** in acetonitrile (298 K).

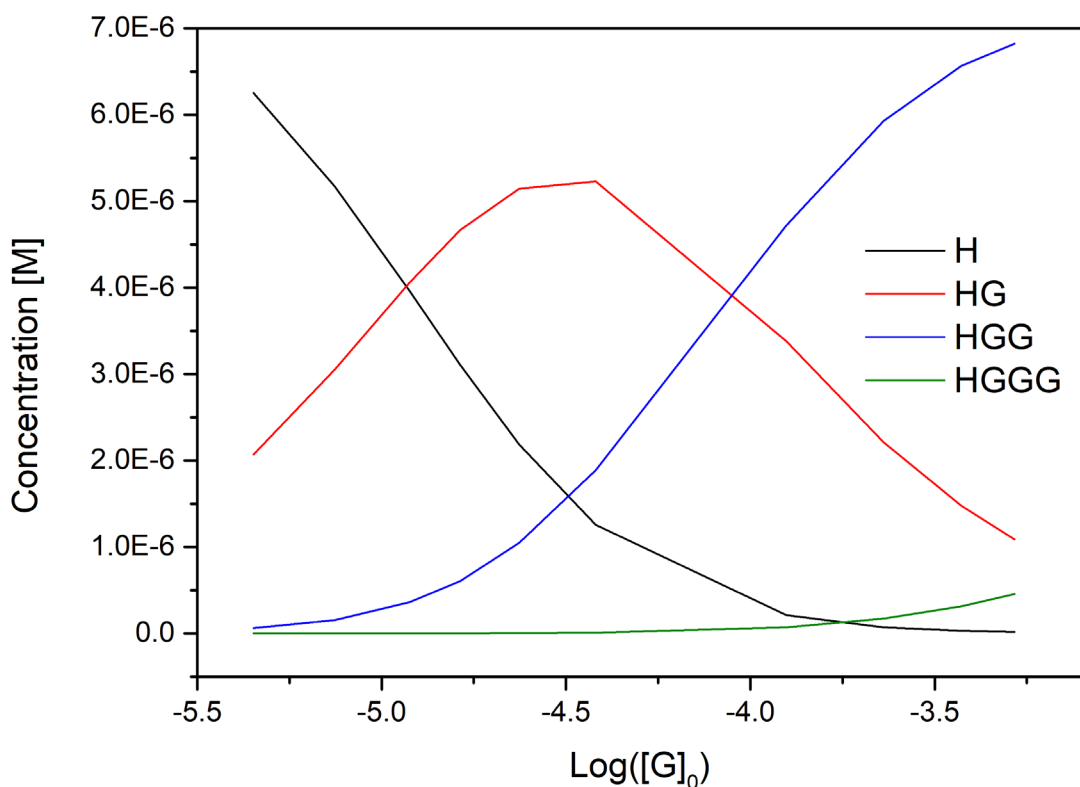

**Figure S 38.** Calculated species concentration of the titration of  $\text{Fe}_4(\text{Zn-L})_6$  with **L2** in acetonitrile (298 K).

**Uv-vis binding study of  $\text{Fe}_4(\text{Zn-L})_6$  and L3:**

**Table S 6.** Fitting results for the 1:3 host-guest system between  $\text{Fe}_4(\text{Zn-L})_6$  and **L3** in acetonitrile for  $K = 3.12 \times 10^5 \text{ M}^{-1}$  at 298 K, where  $\alpha_1 = 1.13$  and  $\alpha_2 = 0.02$ .

| Wavelength [nm] | $\epsilon_{\text{HG}} / 10^5$ | $\epsilon_{\text{HGG}} / 10^5$ | $\epsilon_{\text{HGGG}} / 10^5$ | $R^2$ |
|-----------------|-------------------------------|--------------------------------|---------------------------------|-------|
| 544             | 0.92                          | 1.00                           | 1.20                            | 0.994 |
| 548             | 1.02                          | 1.04                           | 1.31                            | 0.977 |
| 576             | 0.38                          | 0.42                           | 0.32                            | 0.984 |

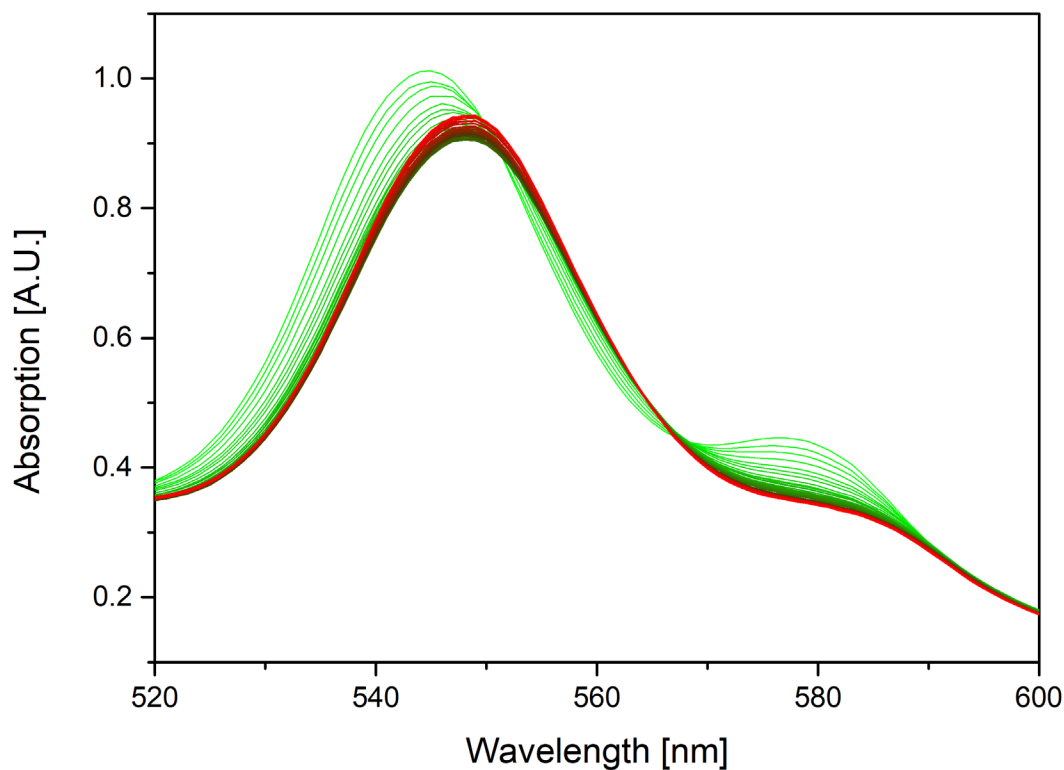

**Figure S 39.** Overlay of UV-vis spectra of the titration of  $\text{Fe}_4(\text{Zn-L})_6$  (host) with **L3** (guest), at a fixed host concentration of  $8.8 \mu\text{M}$  in acetonitrile at 298 K.

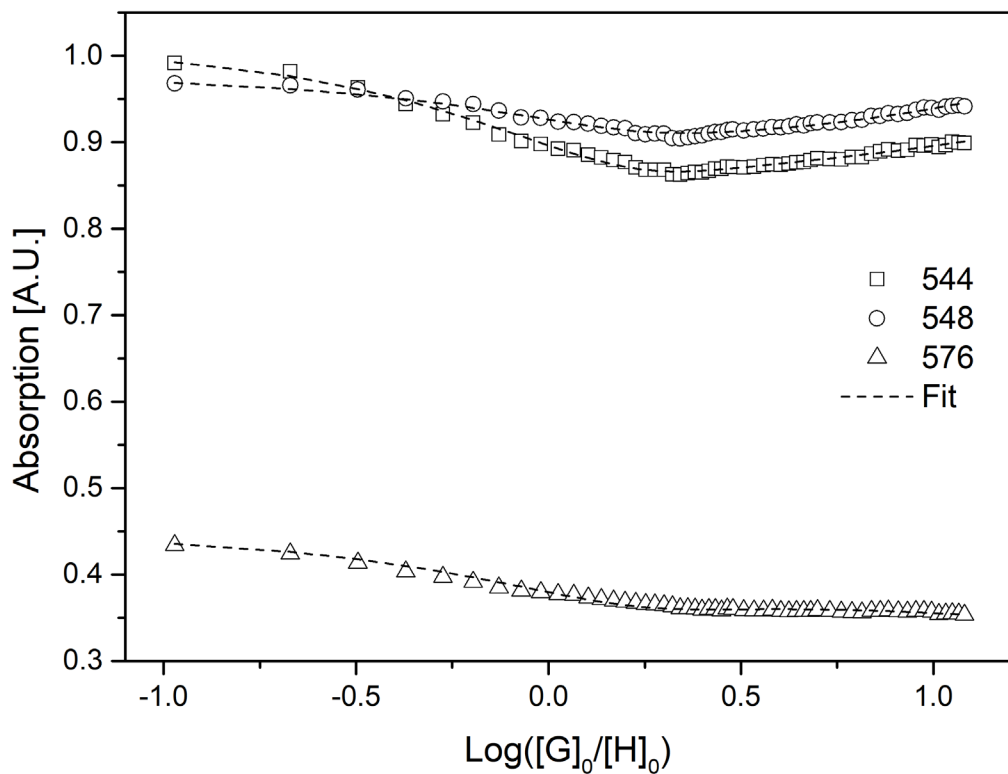

**Figure S 40.** Fitted UV-vis titration curves of  $\text{Fe}_4(\text{Zn-L})_6$  with **L3** in acetonitrile (298 K).

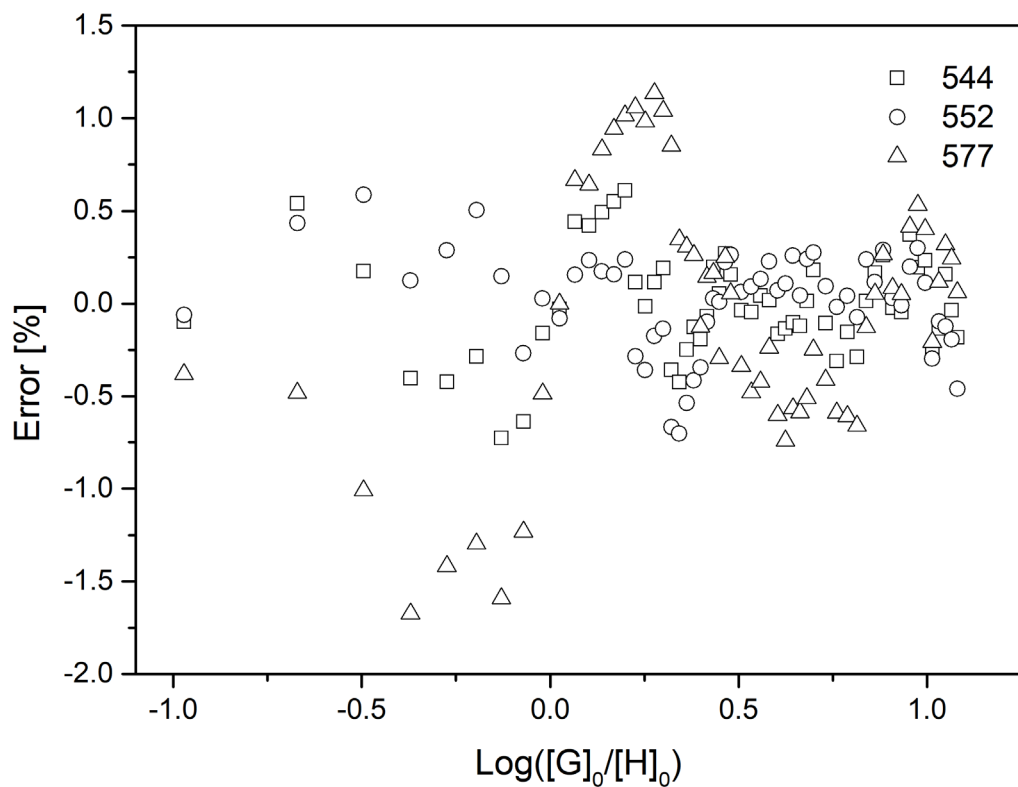

Figure S 41. The error distribution for the fitted curves of  $\text{Fe}_4(\text{Zn-L})_6$  with L3 in acetonitrile (298 K).

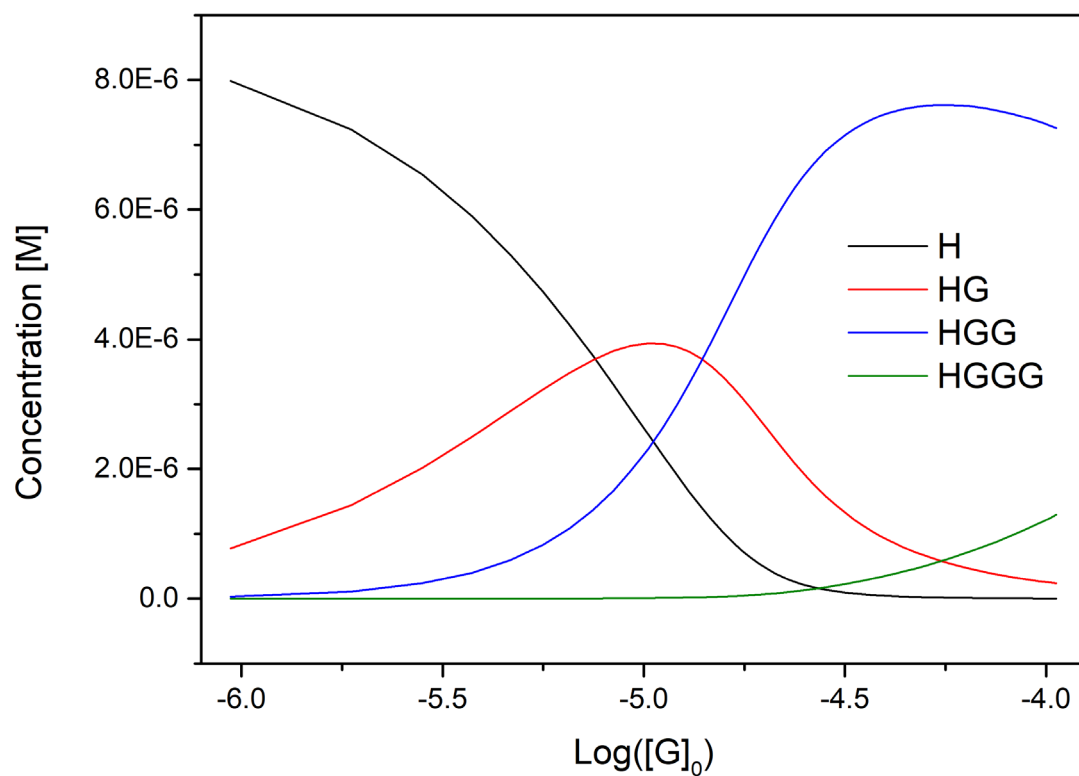

Figure S 42. Calculated species concentration of the titration of  $\text{Fe}_4(\text{Zn-L})_6$  with 3 in acetonitrile (298 K).

### Uv-vis binding study of $\text{Fe}_4(\text{Zn-L})_6$ and Au1:

**Table S 7.** Fitting results for the 1:3 host-guest system between  $\text{Fe}_4(\text{Zn-L})_6$  and Au1 in acetonitrile for  $K = 4.08 \times 10^4 \text{ M}^{-1}$  at 298 K, where  $\alpha_1 = 0.06$  and  $\alpha_2 = 0.05$ .

| Wavelength [nm] | $\epsilon_{\text{HG}} / 10^4$ | $\epsilon_{\text{HGG}} / 10^5$ | $\epsilon_{\text{HGGG}} / 10^5$ | $R^2$ |
|-----------------|-------------------------------|--------------------------------|---------------------------------|-------|
| 540             | 9.46                          | 0.97                           | 0.61                            | 0.985 |
| 557             | 8.27                          | 0.93                           | 0.96                            | 0.995 |
| 587             | 4.00                          | 0.52                           | 0.80                            | 0.996 |

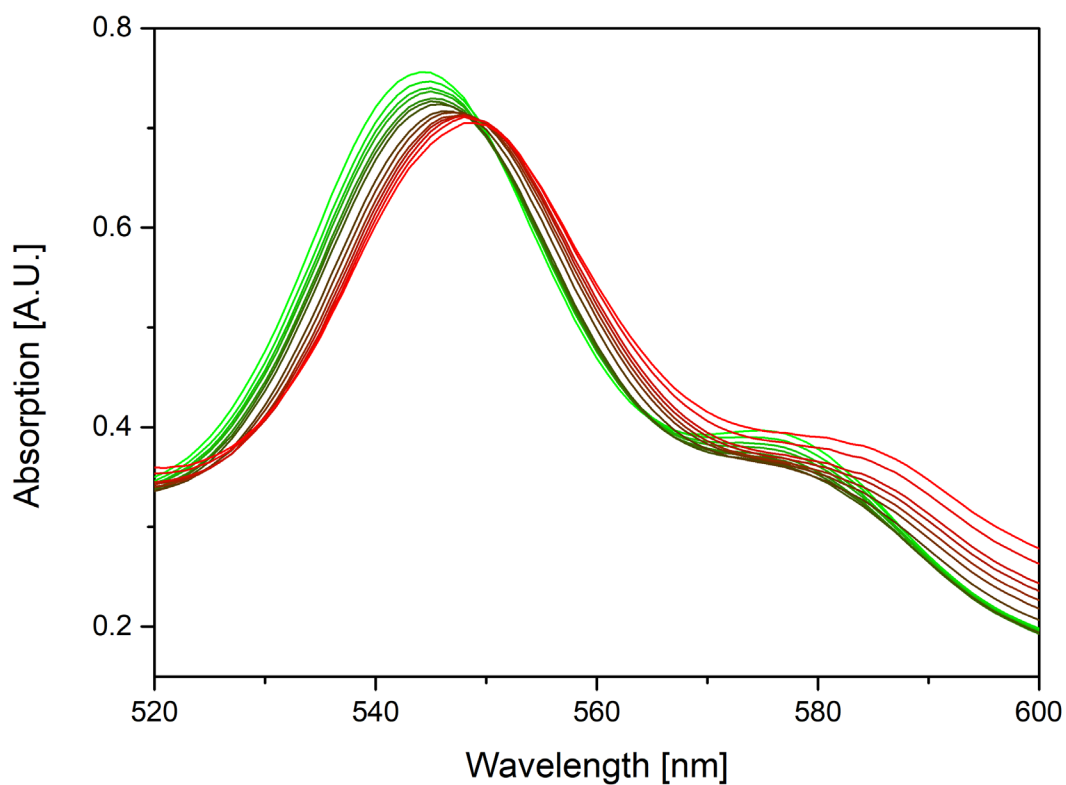

**Figure S 43.** Overlay of UV-vis spectra of the titration of  $\text{Fe}_4(\text{Zn-L})_6$  (host) with Au1 (guest), at a fixed host concentration of  $8.8 \mu\text{M}$  in acetonitrile at 298 K.

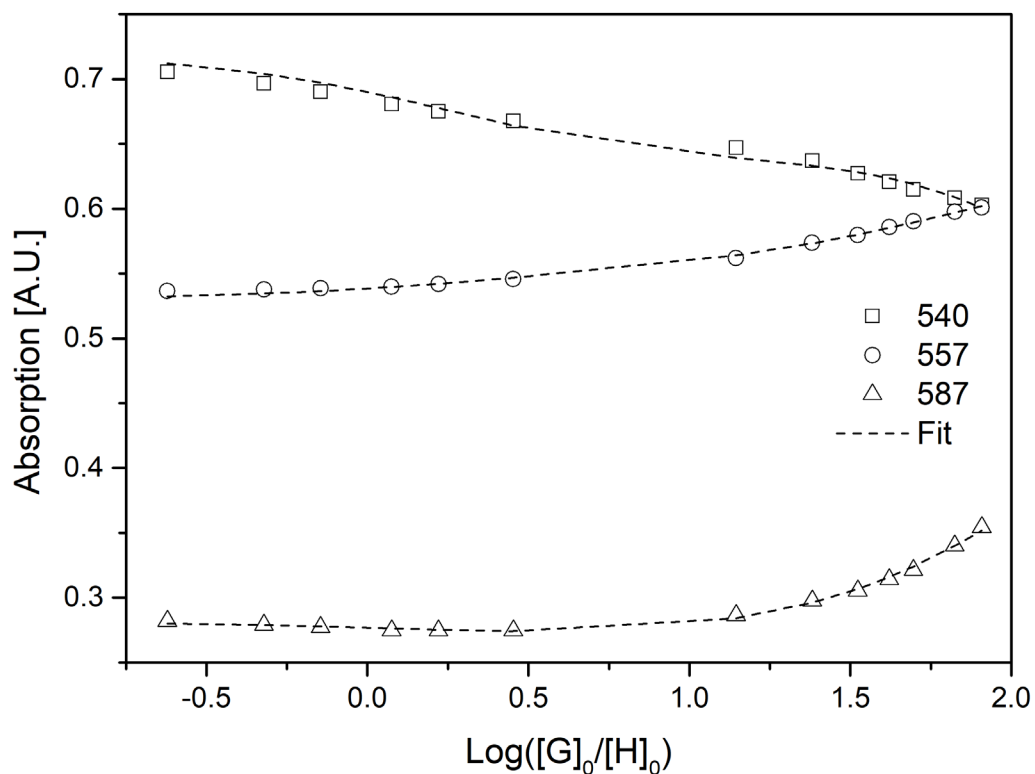

Figure S 44. Fitted UV-vis titration curves of  $\text{Fe}_4(\text{Zn-L})_6$  with **Au1** in acetonitrile (298 K).

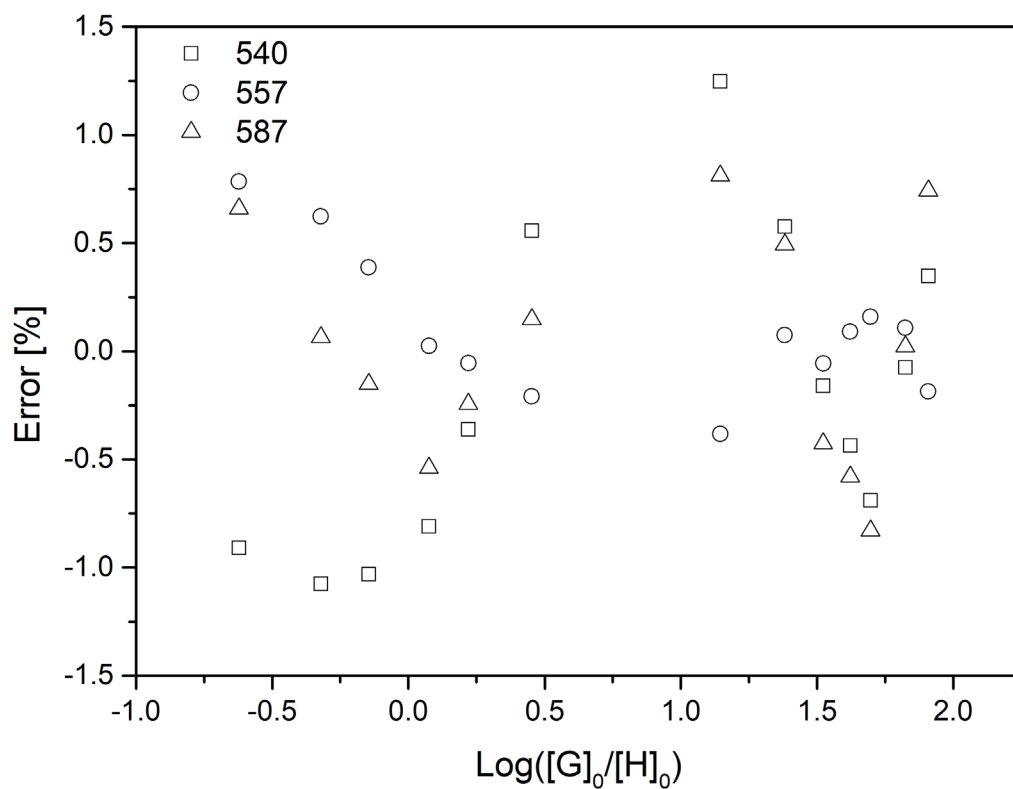

Figure S 45. The error distribution for the fitted curves of  $\text{Fe}_4(\text{Zn-L})_6$  with **Au1** in acetonitrile (298 K).



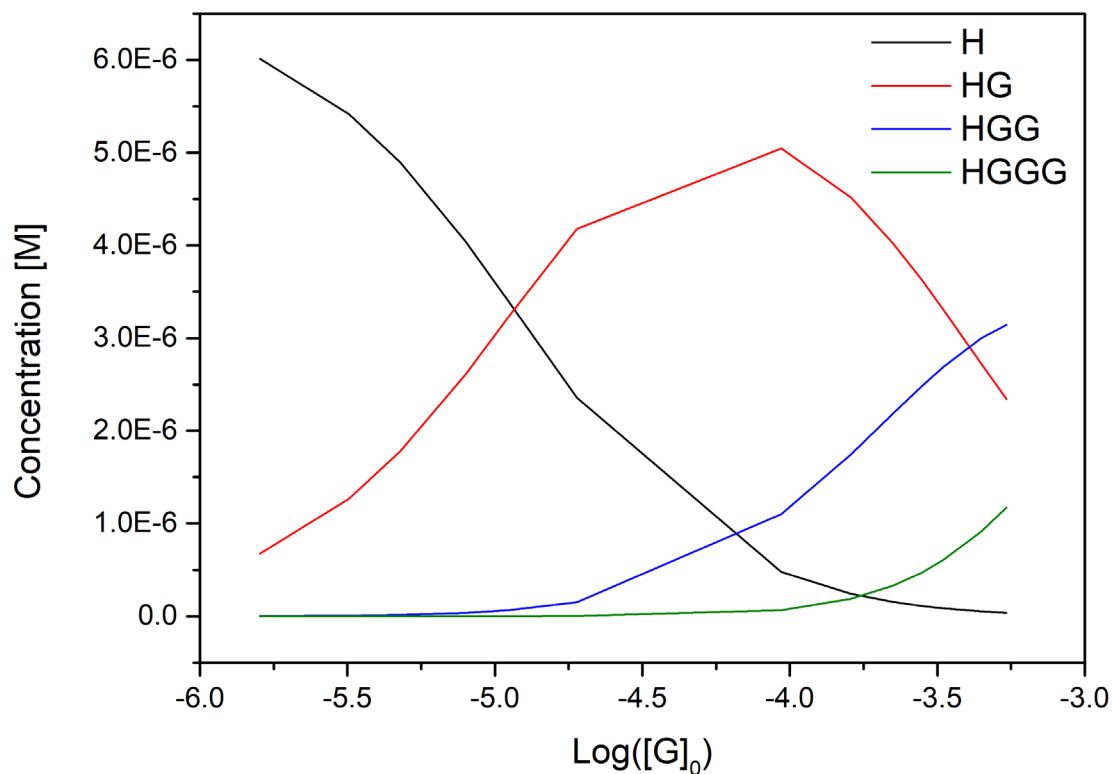

**Figure S 46.** Calculated species concentration of the titration of  $\text{Fe}_4(\text{Zn-L})_6$  with **Au1** in acetonitrile (298 K).

**Uv-vis binding study of ZnTPP and Py (control titration):**

**Table S 8.** Fitting results for the 1:1 host-guest system between **ZnTPP** and **Py** in acetonitrile for  $K = 1.18 \times 10^3 \text{ M}^{-1}$  at 298 K.

| Wavelength [nm] | $\epsilon_{\text{HG}} / 10^5$ | $R^2$  |
|-----------------|-------------------------------|--------|
| 556             | 0.16                          | 0.9977 |
| 561             | 0.19                          | 0.9967 |
| 601             | 0.11                          | 0.9973 |

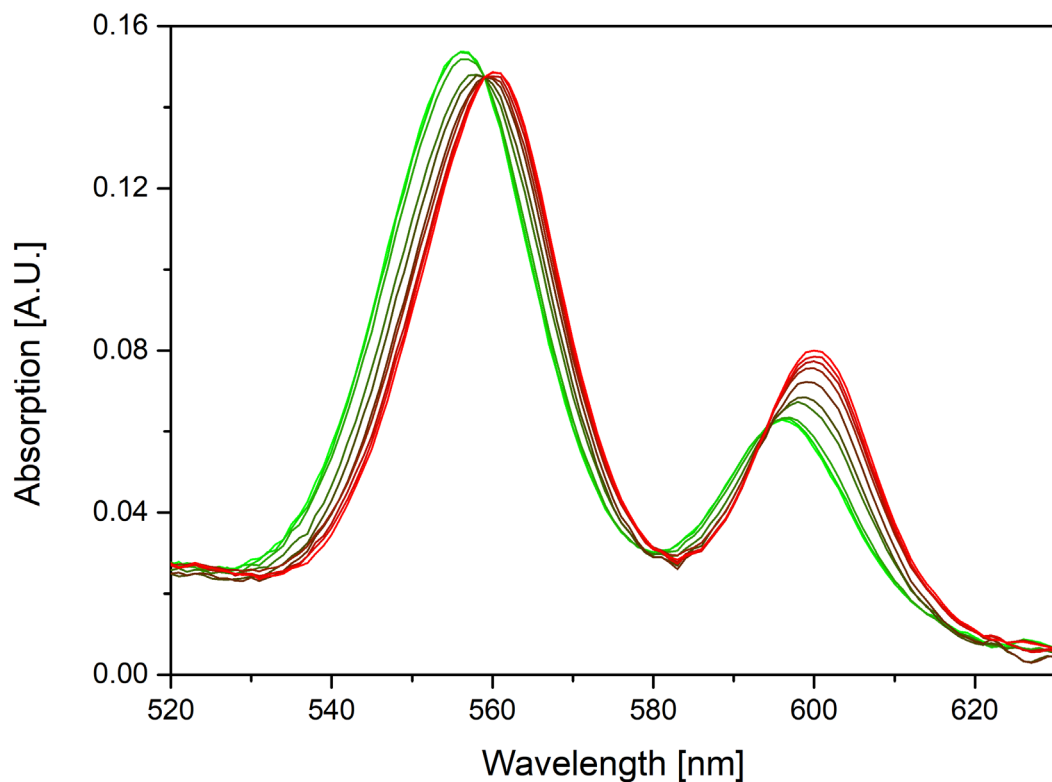

**Figure S 47.** Overlay of UV-vis spectra of the titration of **ZnTPP** (host) with **Py** (guest), at a fixed host concentration of 8.0  $\mu\text{M}$  in acetonitrile at 298 K.

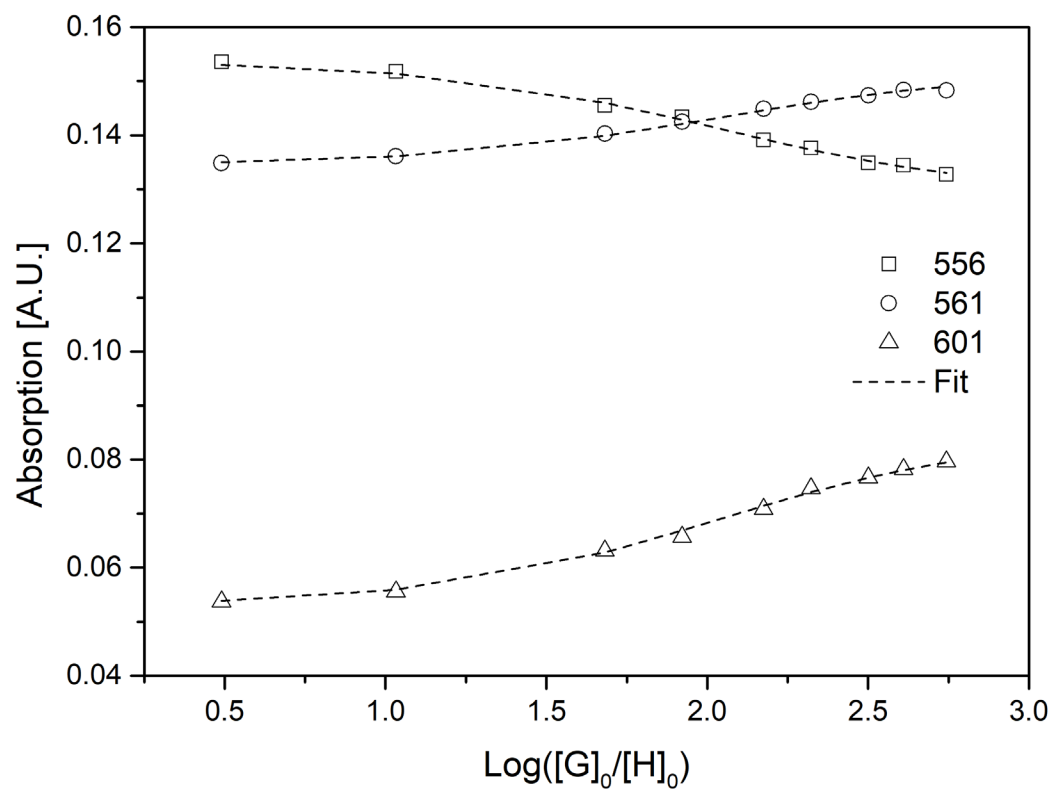

**Figure S 48.** Fitted UV-vis titration curves of **ZnTPP** with **Py** in acetonitrile (298 K).

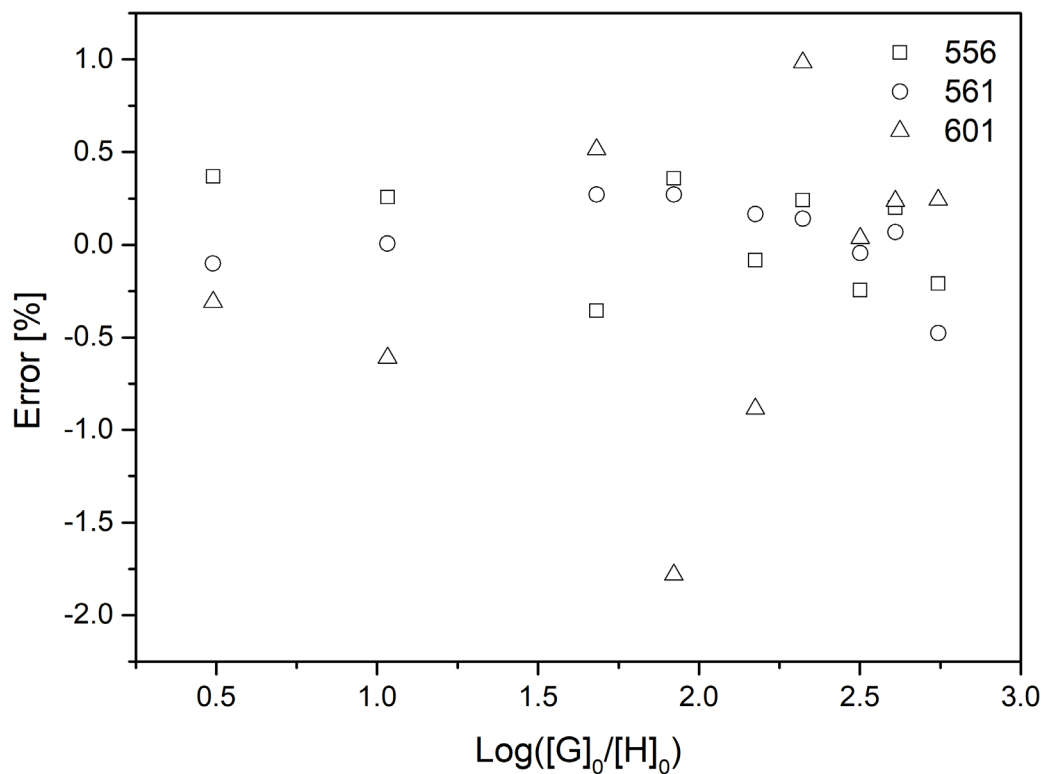

Figure S 49. The error distribution for the fitted curves of ZnTPP with Py in acetonitrile (298 K).

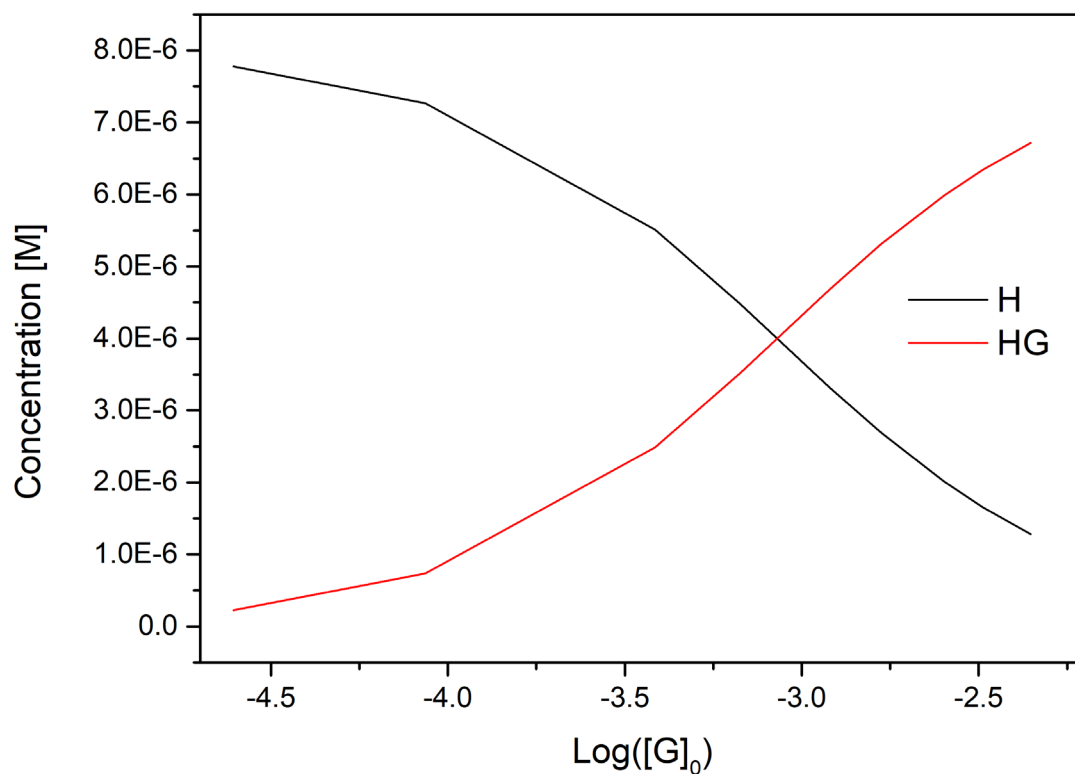

Figure S 50. Calculated species concentration of the titration of ZnTPP with Py in acetonitrile (298 K).

## 8. Encapsulation studies of $\text{Fe}_4(\text{Zn-L})_6$ with various guests

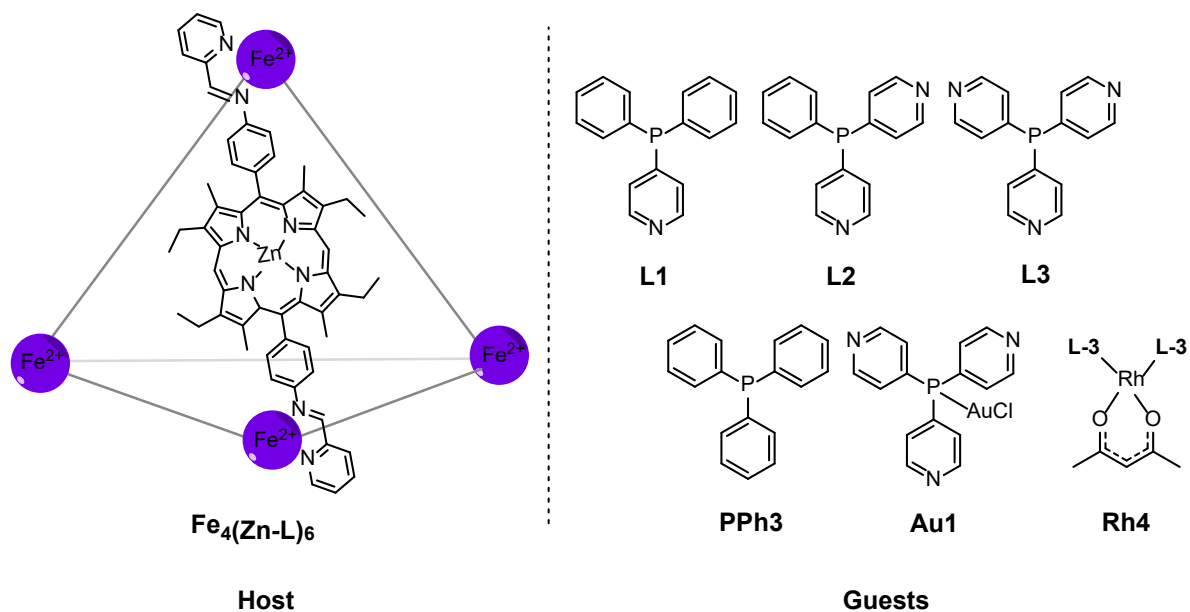

Encapsulation of the various guests was studied using  $^1\text{H}$  NMR and 2D  $^1\text{H}$  DOSY NMR spectroscopy under  $\text{N}_2$  in  $\text{CD}_3\text{CN}$  at 298 K, in addition with mass spectroscopy. For the strongly bound guests **L2**, **L3** and **Rh4** both  $^1\text{H}$  NMR and 2D  $^1\text{H}$  DOSY NMR measurements were performed, and for the rest of the guests **L1**, **PPh3** and **Au1** the encapsulation was studied by  $^1\text{H}$  NMR spectroscopy and/or mass spectroscopy.

## Encapsulation study of $\text{Fe}_4(\text{Zn-L})_6$ and L1

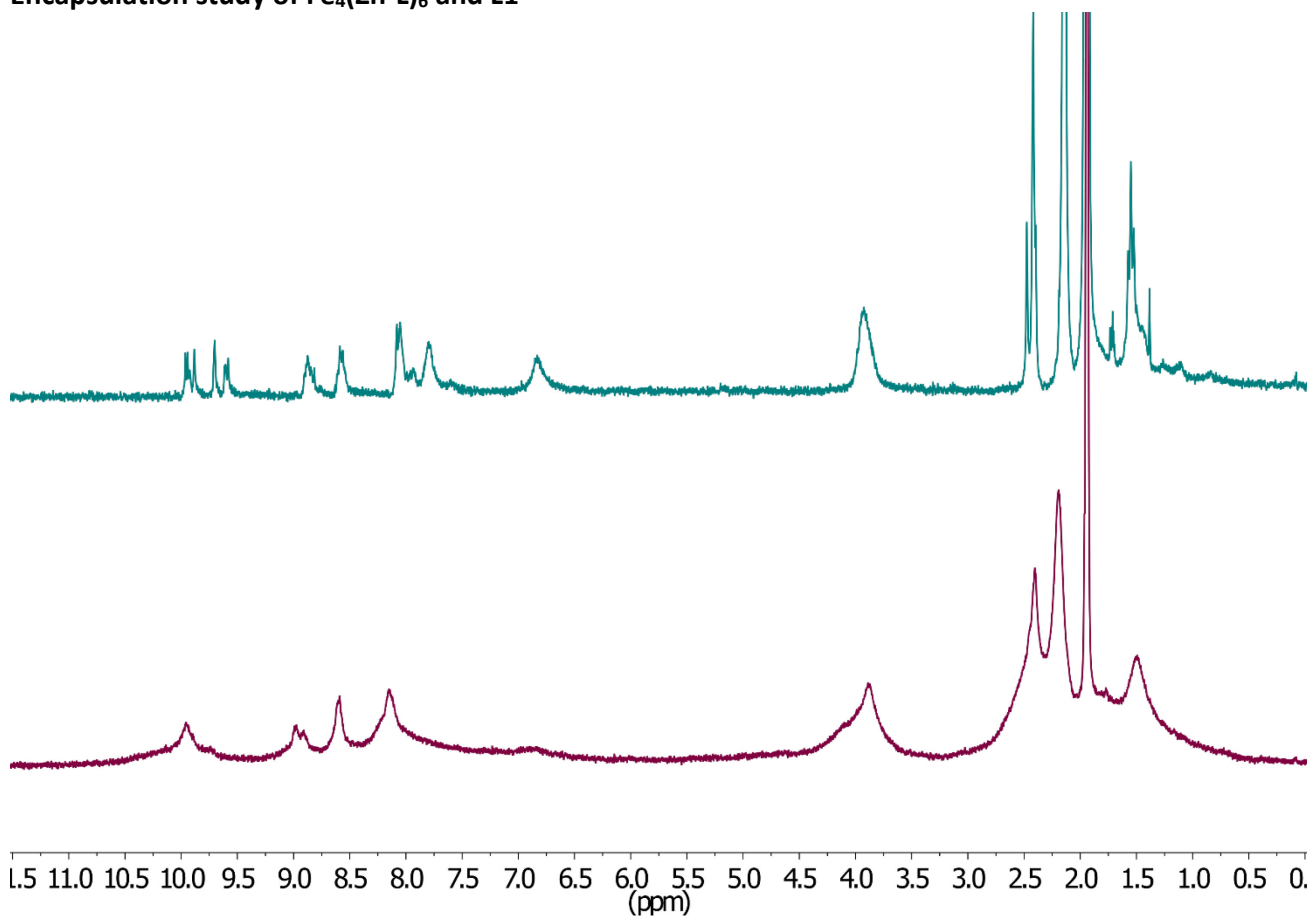

Figure S 51.  $^1\text{H}$  NMR (400 MHz, 298 K) of  $\text{Fe}_4(\text{Zn-L})_6$  (top) and  $(\text{L1})_2@ \text{Fe}_4(\text{Zn-L})_6$  (bottom) in  $\text{CD}_3\text{CN}$ .

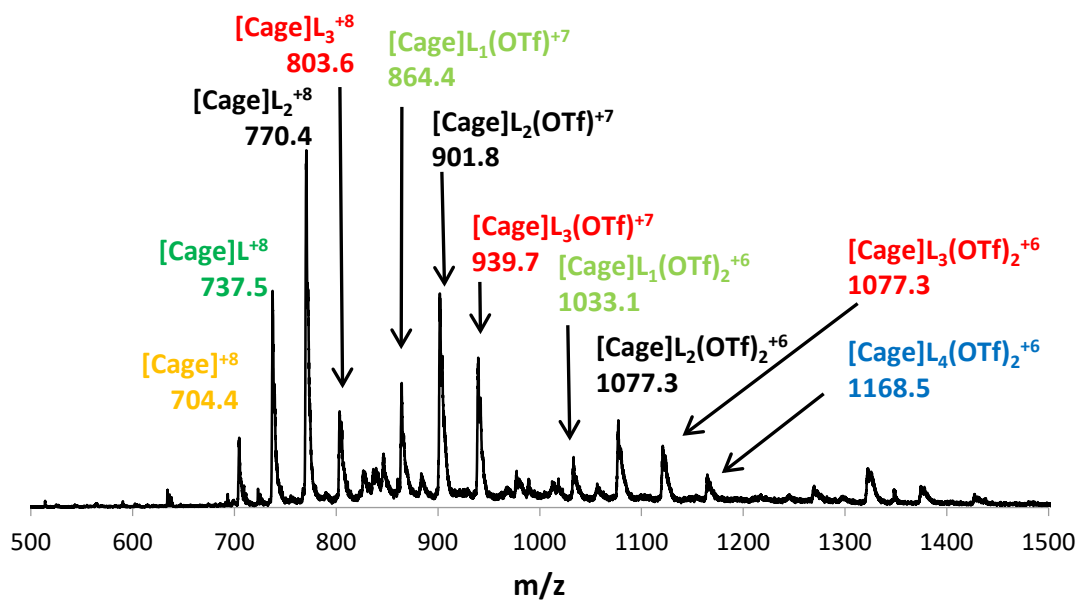

Figure S 52. ESI-MS spectrum of  $(\text{L1})_2@ \text{Fe}_4(\text{Zn-L})_6$ . In the image  $\text{L} = \text{L1}$ .

Encapsulation study of  $\text{Fe}_4(\text{Zn-L})_6$  and L2

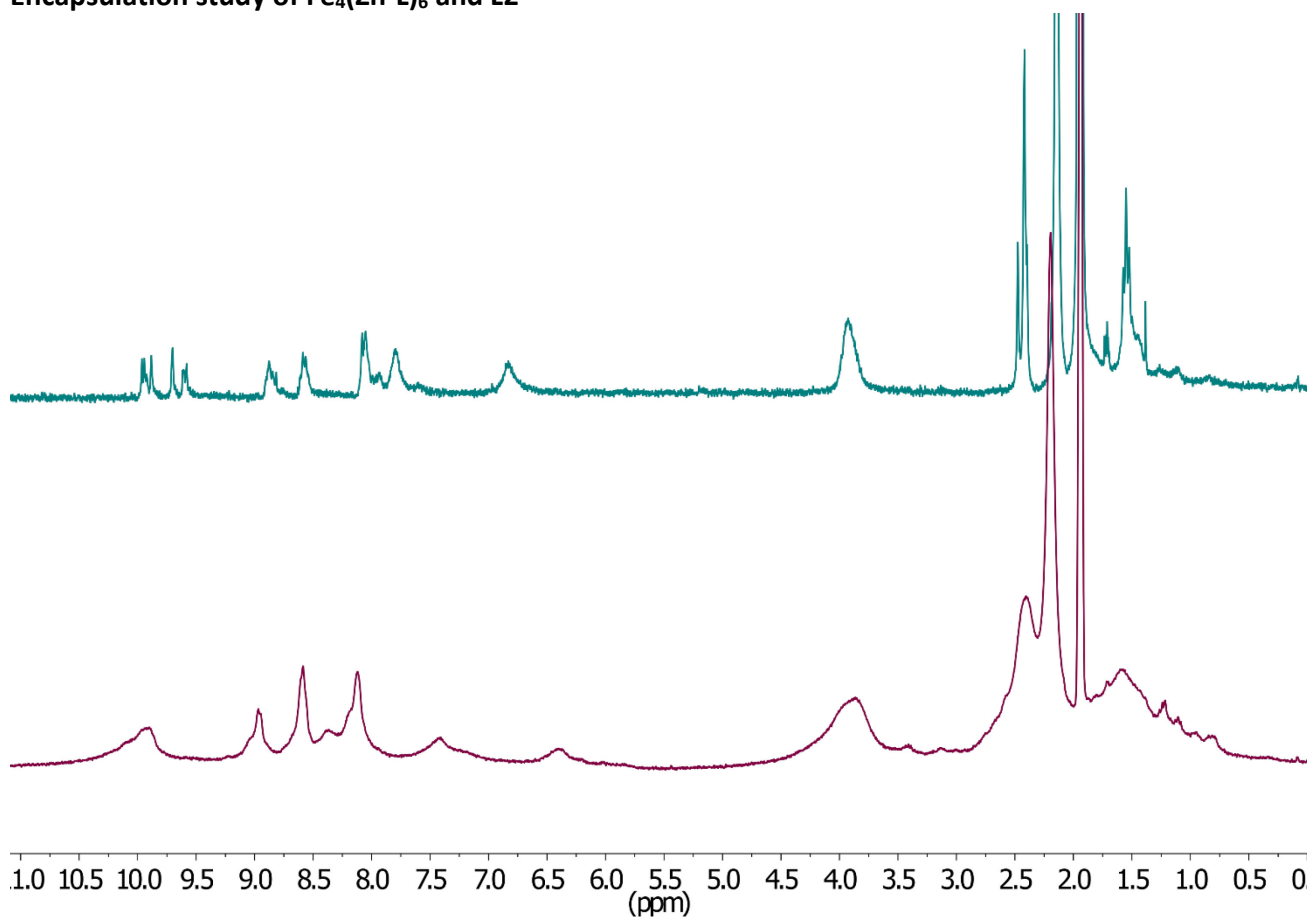

Figure S 53.  $^1\text{H}$  NMR (400 MHz, 298 K) of  $\text{Fe}_4(\text{Zn-L})_6$  (top) and  $(\text{L2})_2@Fe_4(\text{Zn-L})_6$  (bottom) in  $\text{CD}_3\text{CN}$ .

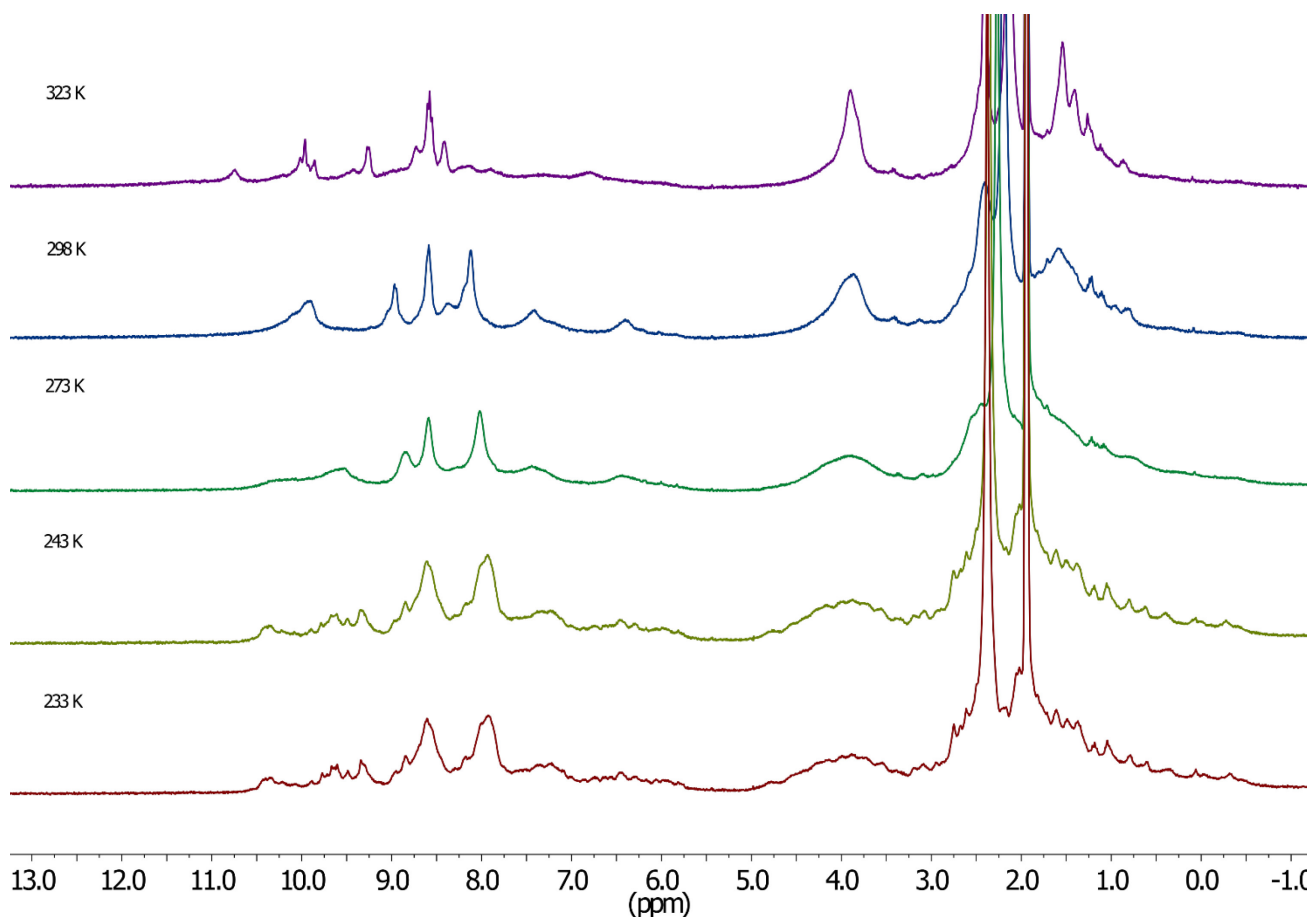

Figure S 54. Variable temperature  $^1\text{H}$  NMR (300 MHz, 298 K) of  $(\text{L2})_2@Fe_4(\text{Zn-L})_6$ .

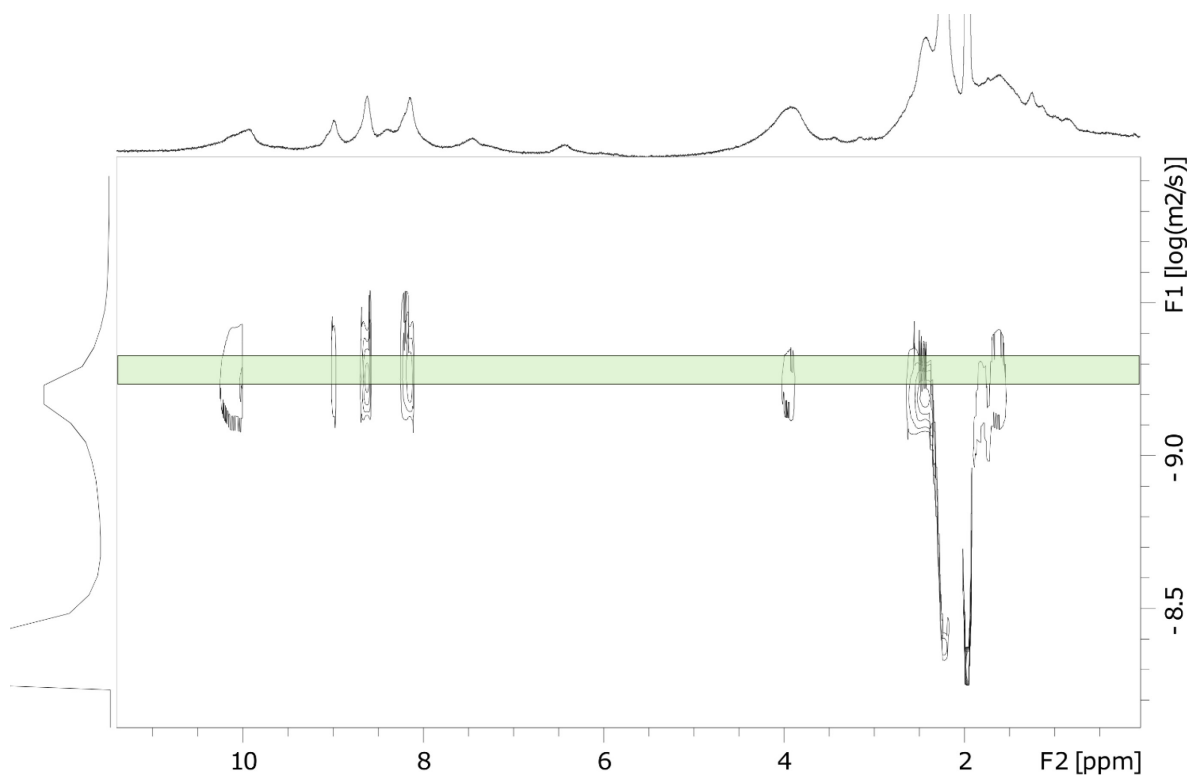

Figure S 55. 2D  $^1\text{H}$  DOSY (298 K) of  $(\text{L2})_2@Fe_4(\text{Zn-L})_6$  in  $\text{CD}_3\text{CN}$ .

**Table S 9.** Different charged species observed in the CSI mass spectrum of the host-guest complex  $(L2)_2@Fe_4(Zn-L)_6$  (and the corresponding found and calculated [m/z]).

| Species                     | Charge | Found [m/z] | Calculated [m/z] |
|-----------------------------|--------|-------------|------------------|
| $Fe_4(Zn-L)_6(L2)_2(OTf)_0$ | 8+     | 770.7598    | 770.7582         |
| $Fe_4(Zn-L)_6(L2)_2(OTf)_1$ | 7+     | 902.2890    | 902.1454         |
| $Fe_4(Zn-L)_6(L2)_2(OTf)_2$ | 6+     | 1077.4950   | 1077.4951        |
| $Fe_4(Zn-L)_6(L2)_2(OTf)_3$ | 5+     | 1322.7839   | 1322.7846        |
| $Fe_4(Zn-L)_6(L2)_2(OTf)_4$ | 4+     | 1690.7164   | 1690.7188        |
| $Fe_4(Zn-L)_6(L2)_2(OTf)_5$ | 3+     | 2303.9420   | 2303.9426        |

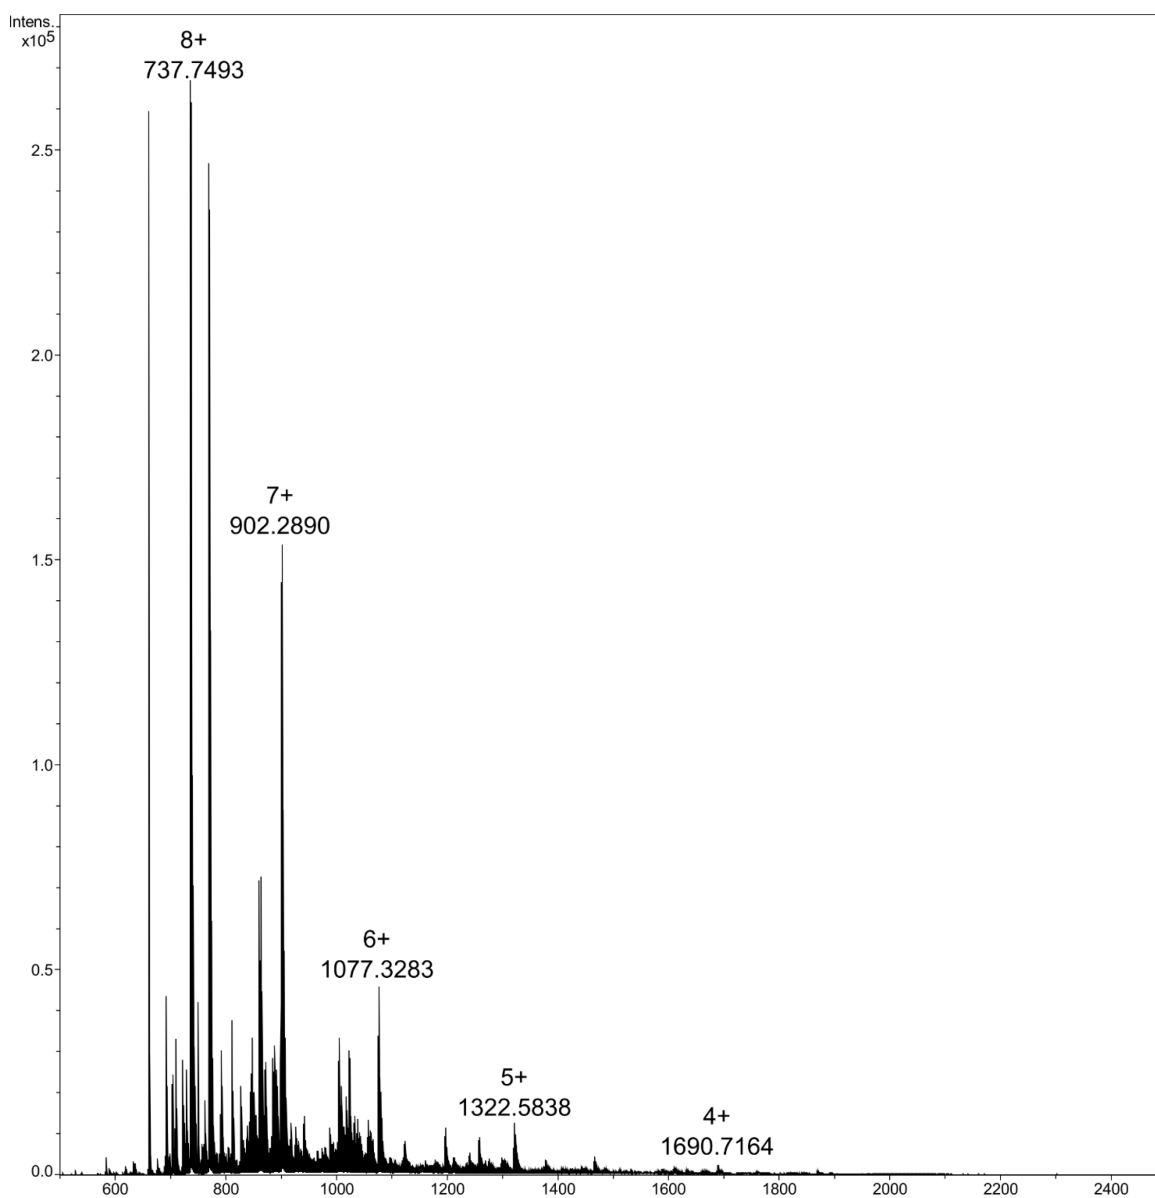

**Figure S 56.** CSI mass spectrum (full spectrum) of the host-guest complex  $(L2)_2@Fe_4(Zn-L)_6$  with a spray temperature of  $-40\text{ }^\circ\text{C}$  and a dry gas temperature of  $-35\text{ }^\circ\text{C}$ .



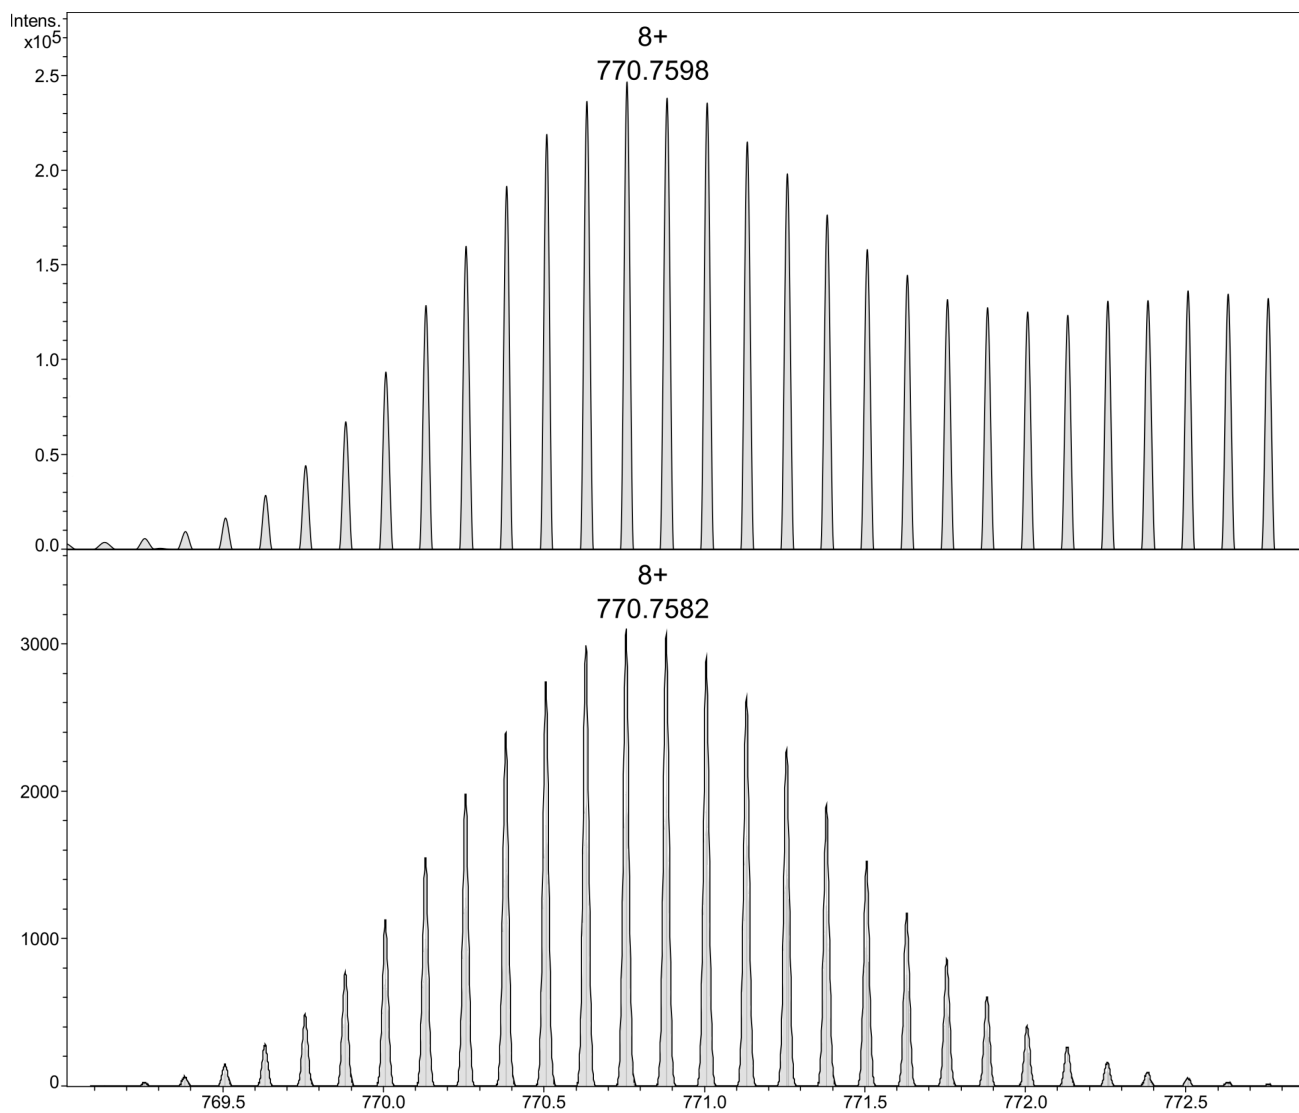

**Figure S 57.** Expanded spectrum for the charged species  $[\text{Fe}_4(\text{Zn-L})_6(\text{L}_2)_2(\text{OTf})_0]^{8+}$  observed (above) in the CSI mass spectrum of the host-guest complex  $(\text{L}_2)_2@[\text{Fe}_4(\text{Zn-L})_6]$  and simulated isotopic distribution (below). The shoulder on the observed signal belongs to the same species with an oxidized phosphine.

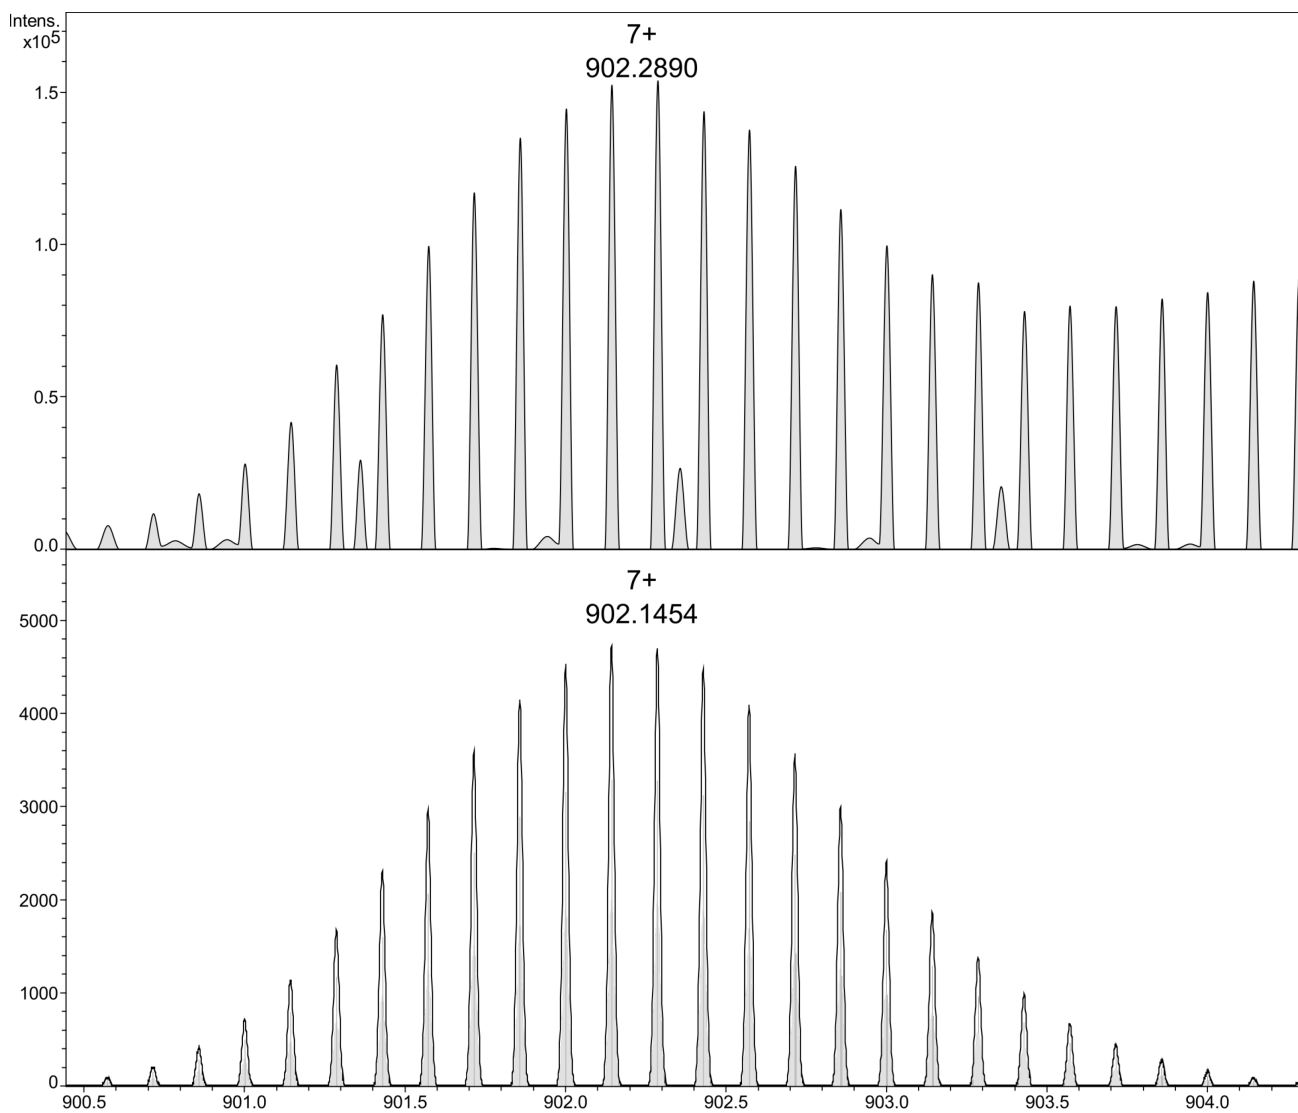

**Figure S 58.** Expanded spectrum for the charged species  $[\text{Fe}_4(\text{Zn-L})_6(\text{L}_2)_2(\text{OTf})_1]^{7+}$  observed (above) in the CSI mass spectrum of the host-guest complex  $(\text{L}_2)_2@(\text{Fe}_4(\text{Zn-L})_6)$  and simulated isotopic distribution (below). The shoulder on the observed signal belongs to the same species with an oxidized phosphine.

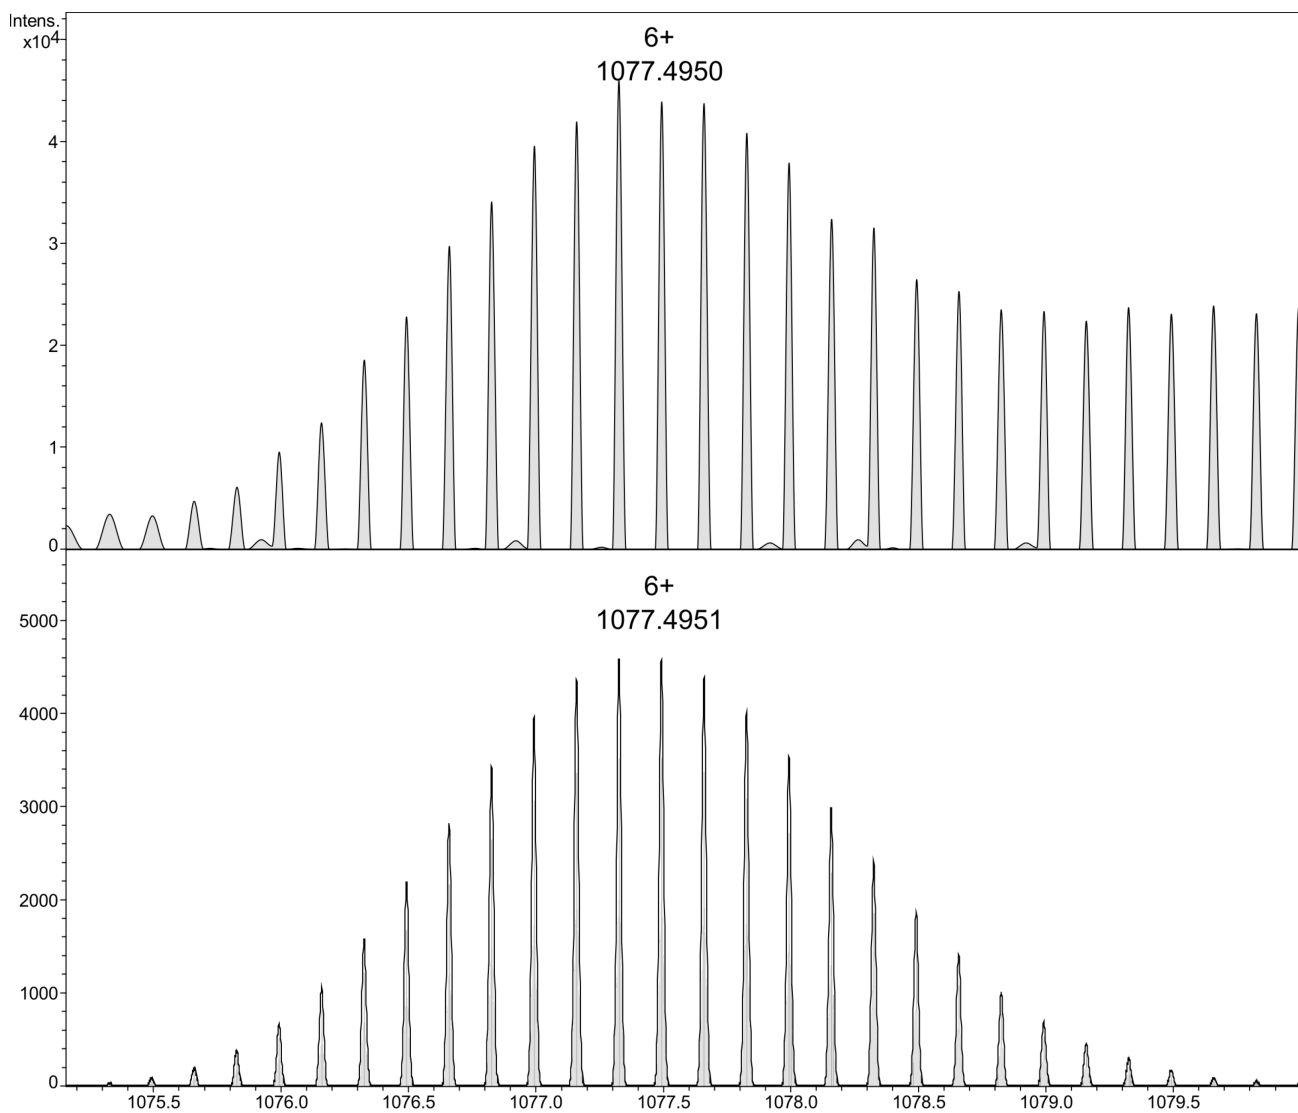

**Figure S 59.** Expanded spectrum for the charged species  $[\text{Fe}_4(\text{Zn-L})_6(\text{L}_2)_2(\text{OTf})_2]^{6+}$  observed (above) in the CSI mass spectrum of the host-guest complex  $(\text{L}_2)_2@(\text{Fe}_4(\text{Zn-L})_6)$  and simulated isotopic distribution (below). The shoulder on the observed signal belongs to the same species with an oxidized phosphine.

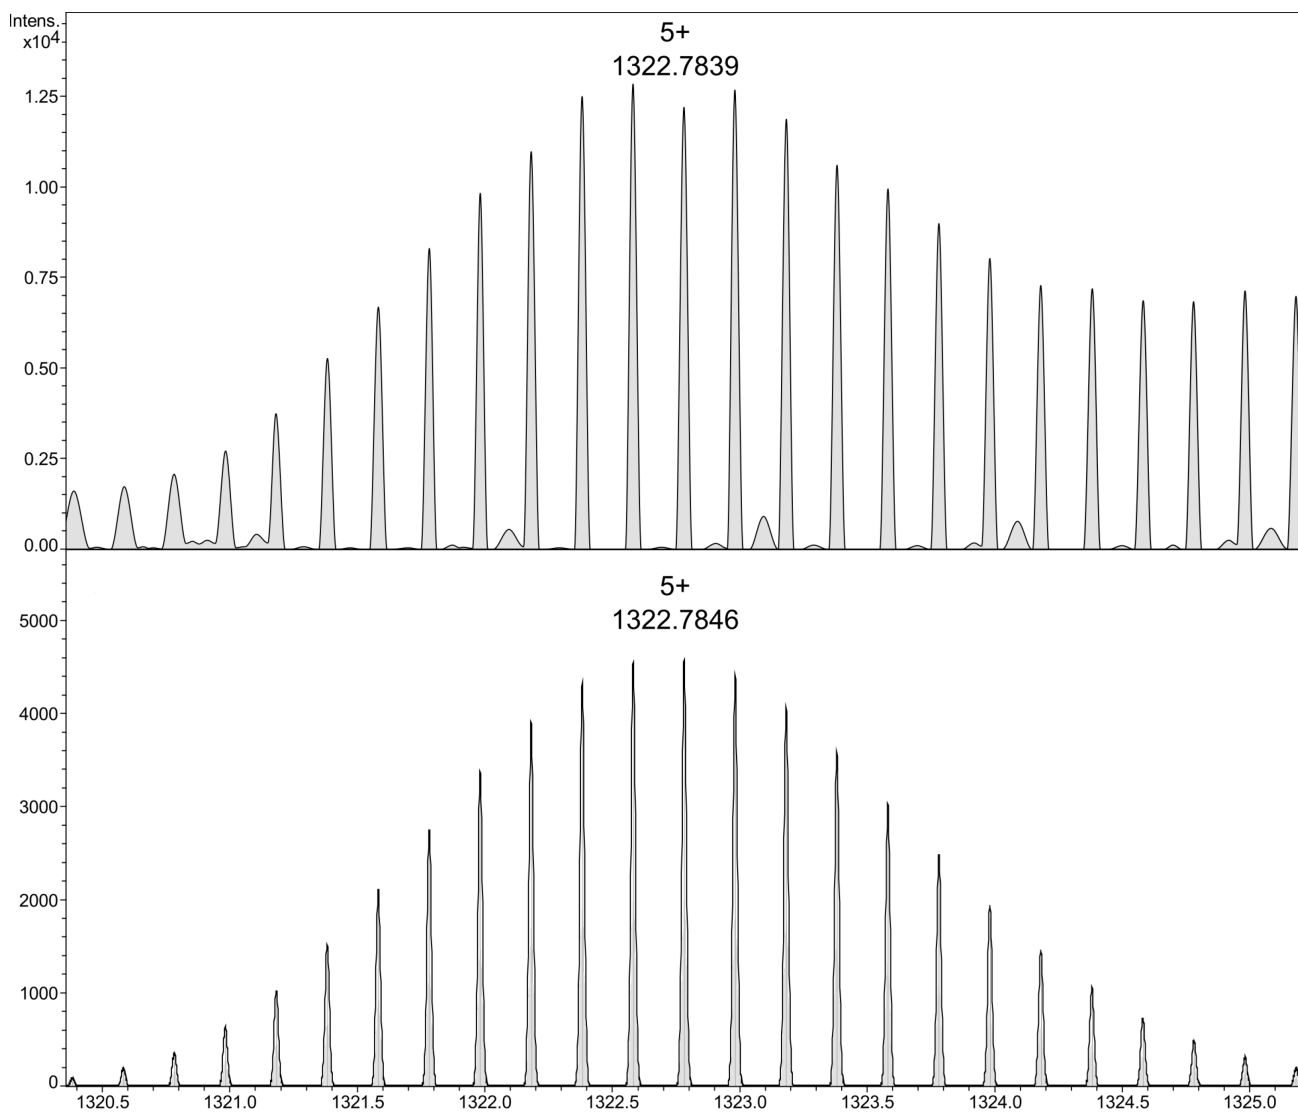

**Figure S 60.** Expanded spectrum for the charged species  $[\text{Fe}_4(\text{Zn-L})_6(\text{L}_2)_2(\text{OTf})_3]^{5+}$  observed (above) in the CSI mass spectrum of the host-guest complex  $(\text{L}_2)_2@(\text{Fe}_4(\text{Zn-L})_6)$  and simulated isotopic distribution (below). The shoulder on the observed signal belongs to the same species with an oxidized phosphine.

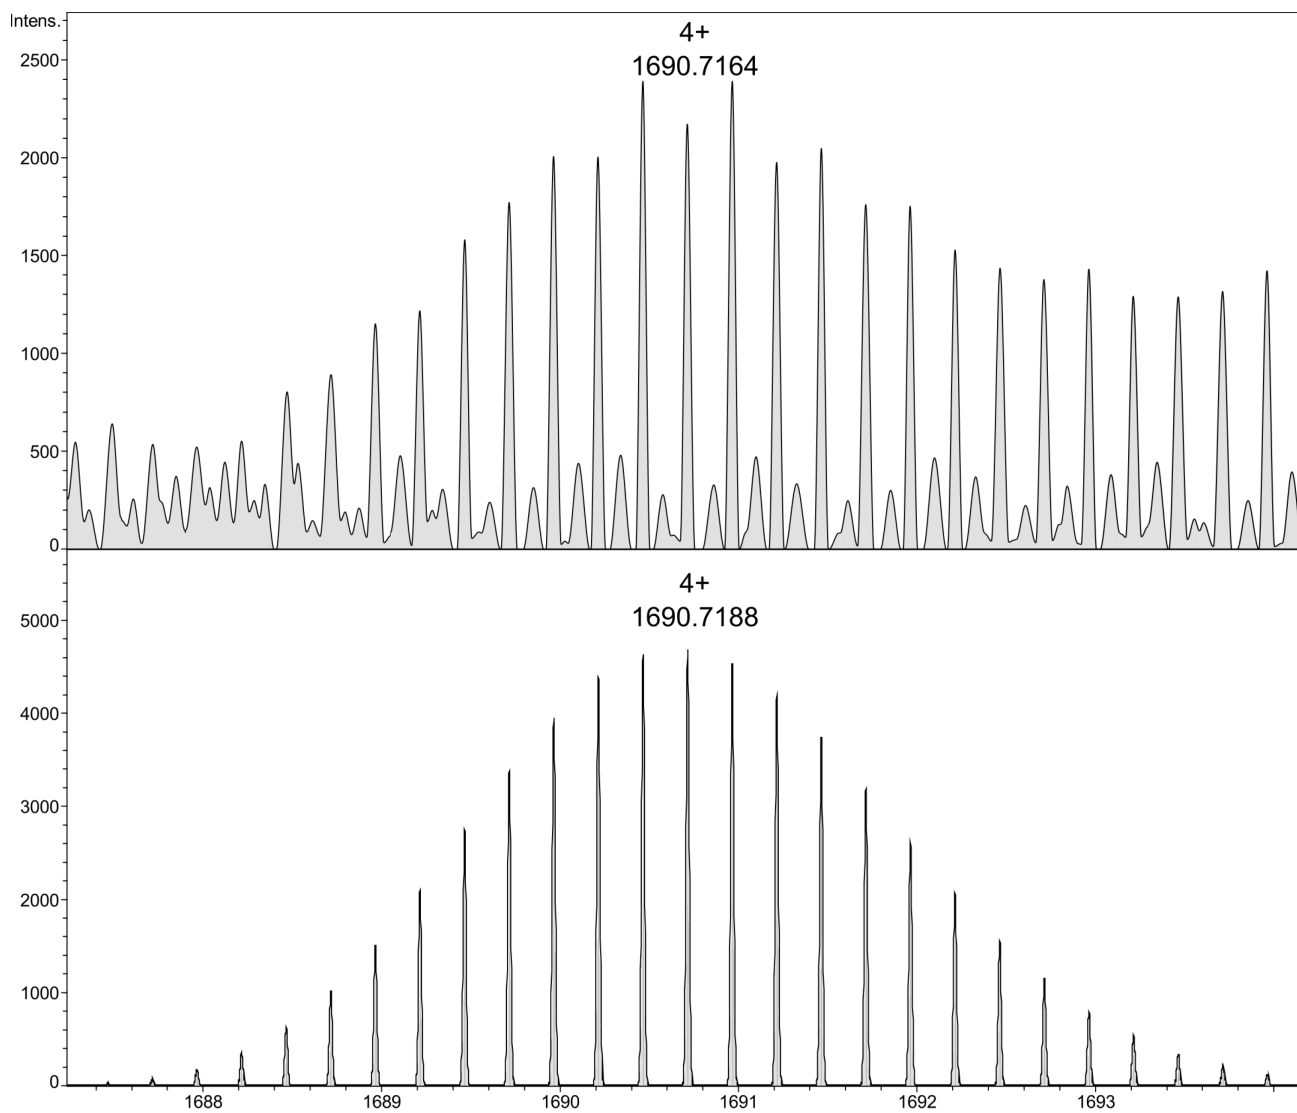

**Figure S 61.** Expanded spectrum for the charged species  $[Fe_4(Zn-L)_6(L_2)_2(OTf)_0]^{4+}$  observed (above) in the CSI mass spectrum of the host-guest complex  $(L_2)_2@Fe_4(Zn-L)_6$  and simulated isotopic distribution (below). The shoulder on the observed signal belongs to the same species with an oxidized phosphine.

Encapsulation study of  $\text{Fe}_4(\text{Zn-L})_6$  and L3

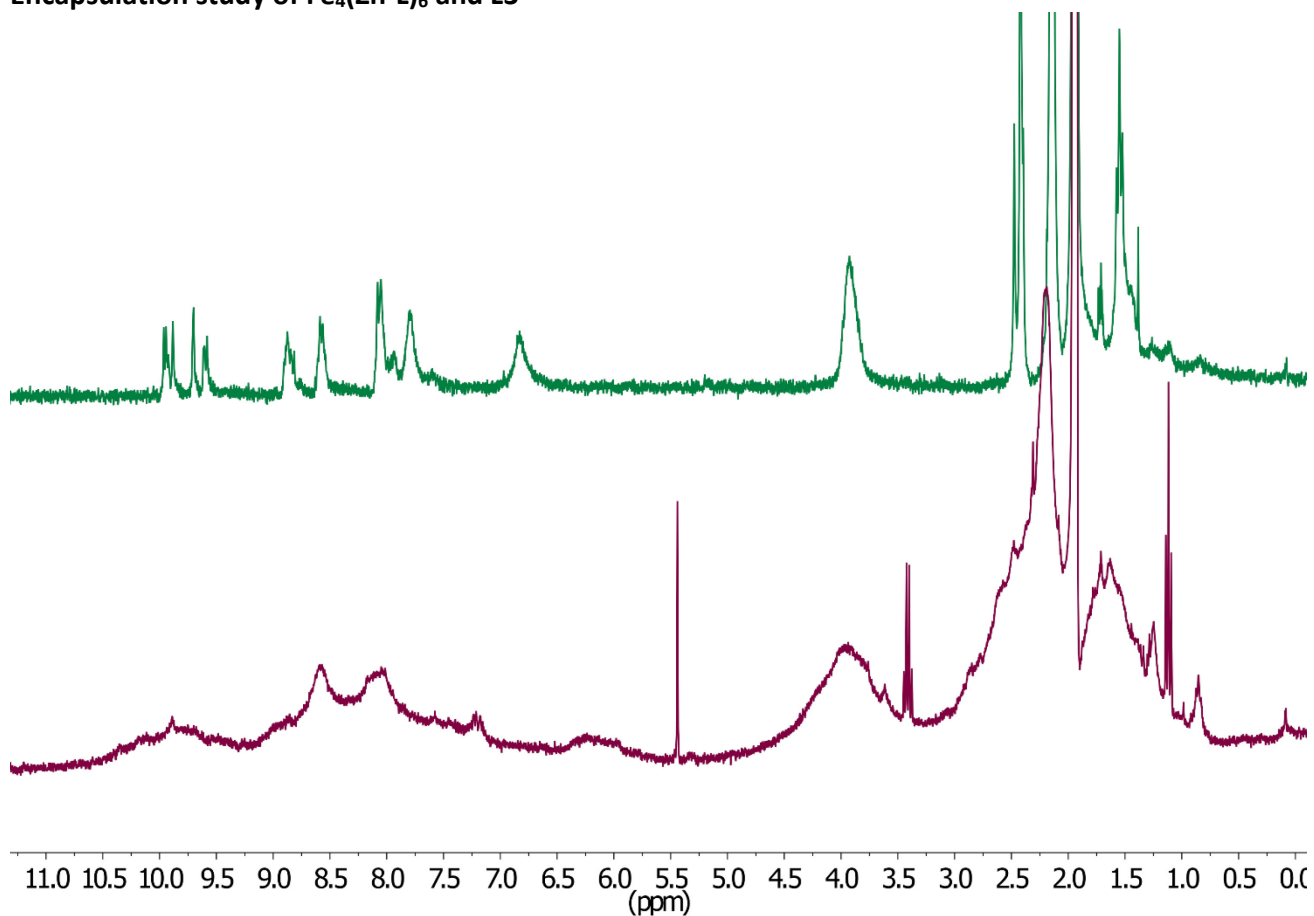

Figure S 62.  $^1\text{H}$  NMR (300 MHz, 298 K) of  $\text{Fe}_4(\text{Zn-L})_6$  (top) and  $(\text{L3})_2@ \text{Fe}_4(\text{Zn-L})_6$  (bottom) in  $\text{CD}_3\text{CN}$ .

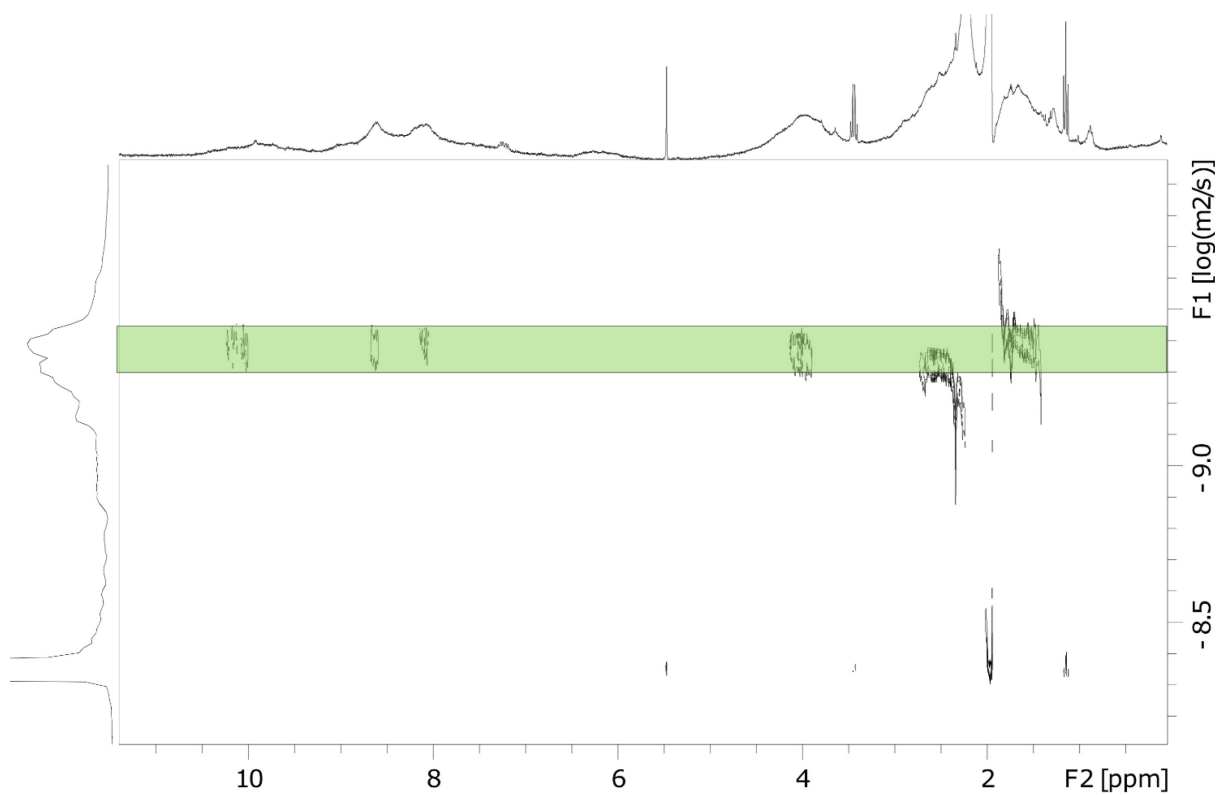

Figure S 63. 2D  $^1\text{H}$  DOSY (298 K) of  $(\text{L3})_2@ \text{Fe}_4(\text{Zn-L})_6$  in  $\text{CD}_3\text{CN}$ .

**Table S 10.** Different charged species observed in the CSI mass spectrum of the host-guest complex  $(\mathbf{L3})_2@Fe_4(\mathbf{Zn-L})_6$  and the corresponding found and calculated [m/z].

| Species                                              | Charge | Found [m/z] | Calculated [m/z] |
|------------------------------------------------------|--------|-------------|------------------|
| $Fe_4(\mathbf{Zn-L})_6(\mathbf{L3})_2(\text{OTf})_0$ | 8+     | 771.0083    | 771.0070         |
| $Fe_4(\mathbf{Zn-L})_6(\mathbf{L3})_2(\text{OTf})_1$ | 7+     | 902.5731    | 902.4298         |
| $Fe_4(\mathbf{Zn-L})_6(\mathbf{L3})_2(\text{OTf})_2$ | 6+     | 1077.8261   | 1077.8268        |
| $Fe_4(\mathbf{Zn-L})_6(\mathbf{L3})_2(\text{OTf})_3$ | 5+     | 1323.1816   | 1323.1826        |
| $Fe_4(\mathbf{Zn-L})_6(\mathbf{L3})_2(\text{OTf})_4$ | 4+     | 1691.2128   | 1691.2164        |

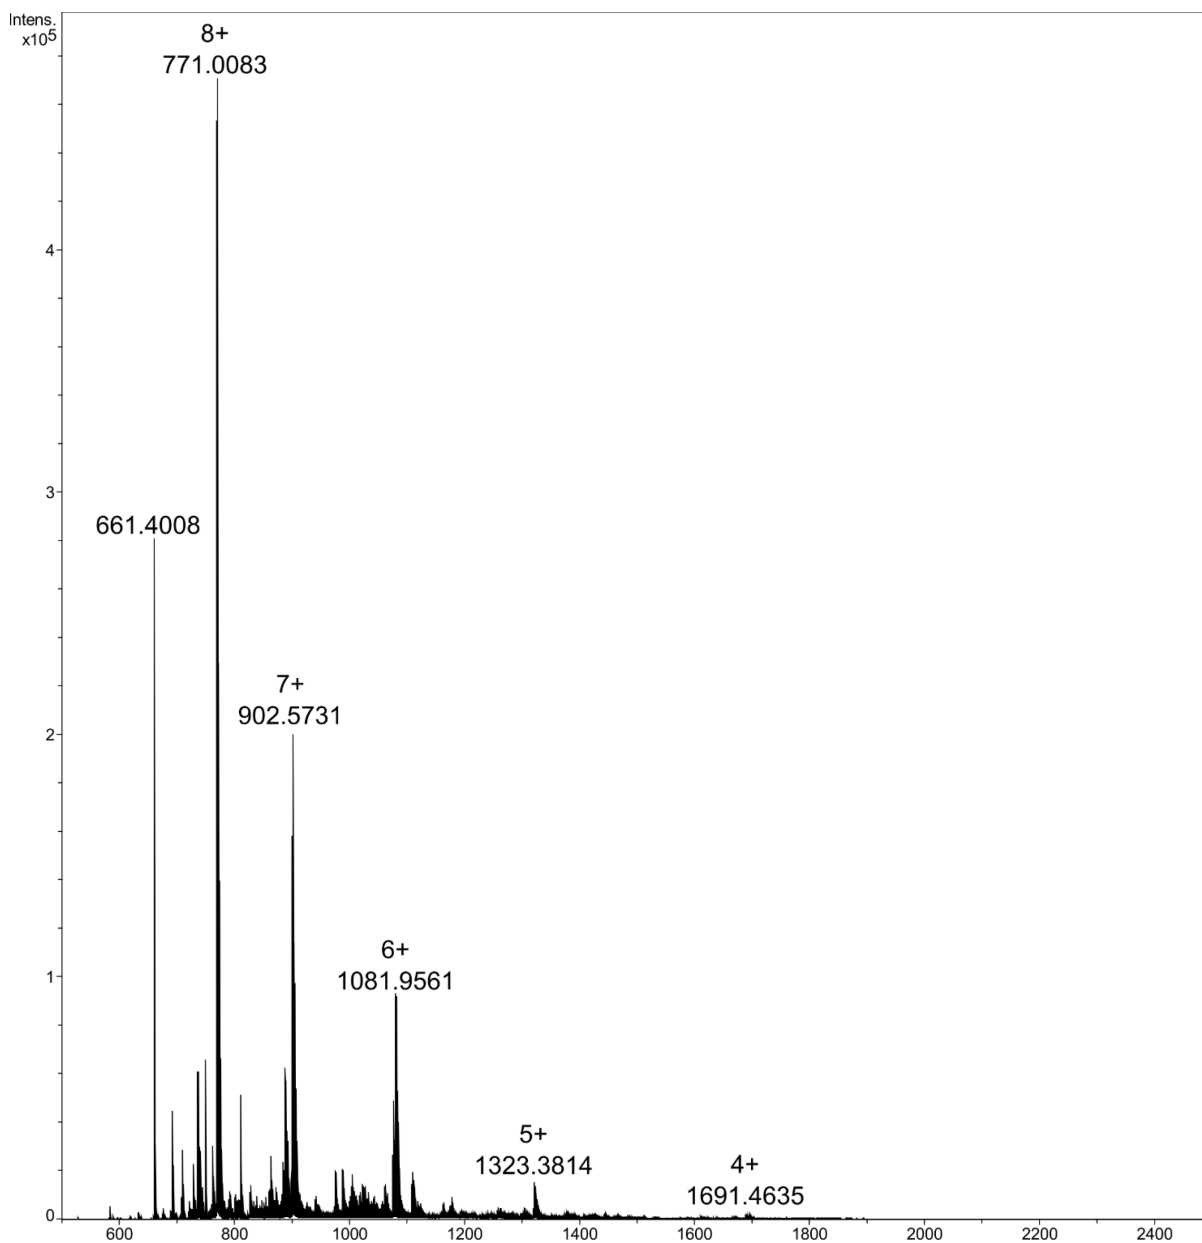

**Figure S 64.** CSI mass spectrum (full spectrum) of the host-guest complex  $(\mathbf{L3})_2@Fe_4(\mathbf{Zn-L})_6$  with a spray temperature of  $-40\text{ }^\circ\text{C}$  and a dry gas temperature of  $-35\text{ }^\circ\text{C}$ . The peak with m/z ratio of 661 belongs to demetallated Zn-P.

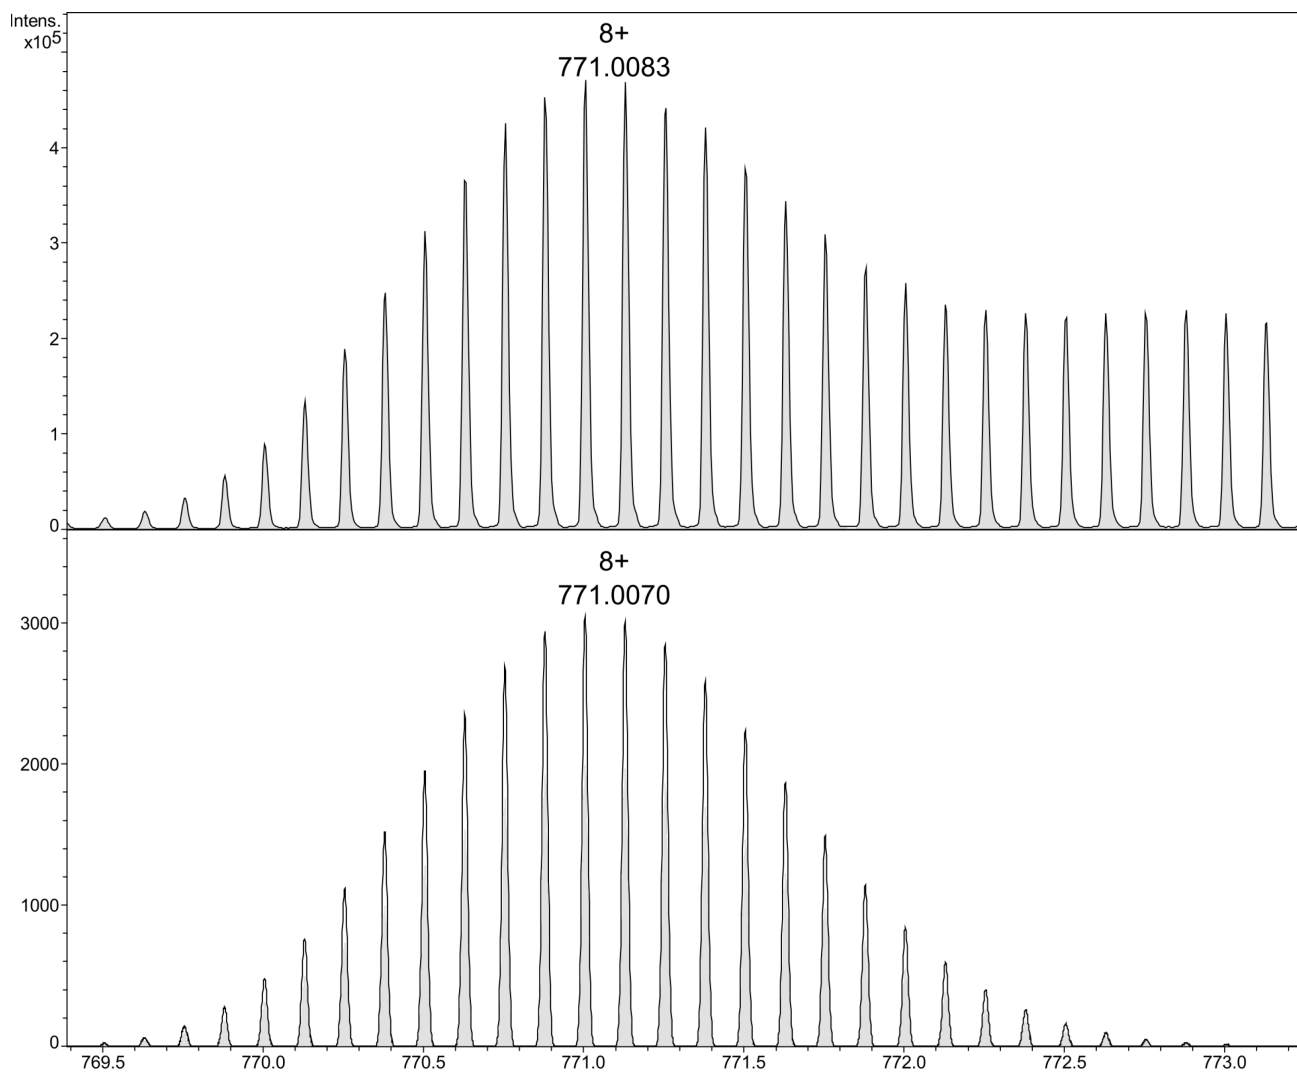

**Figure S 65.** Expanded spectrum for the charged species  $[\text{Fe}_4(\text{Zn-L})_6(\text{L3})_2(\text{OTf})_0]^{8+}$  observed (above) in the CSI mass spectrum of the host-guest complex  $(\text{L3})_2@(\text{Fe}_4(\text{Zn-L})_6)$  and simulated isotopic distribution (below). The shoulder on the observed signal belongs to the same species with an oxidized phosphine.



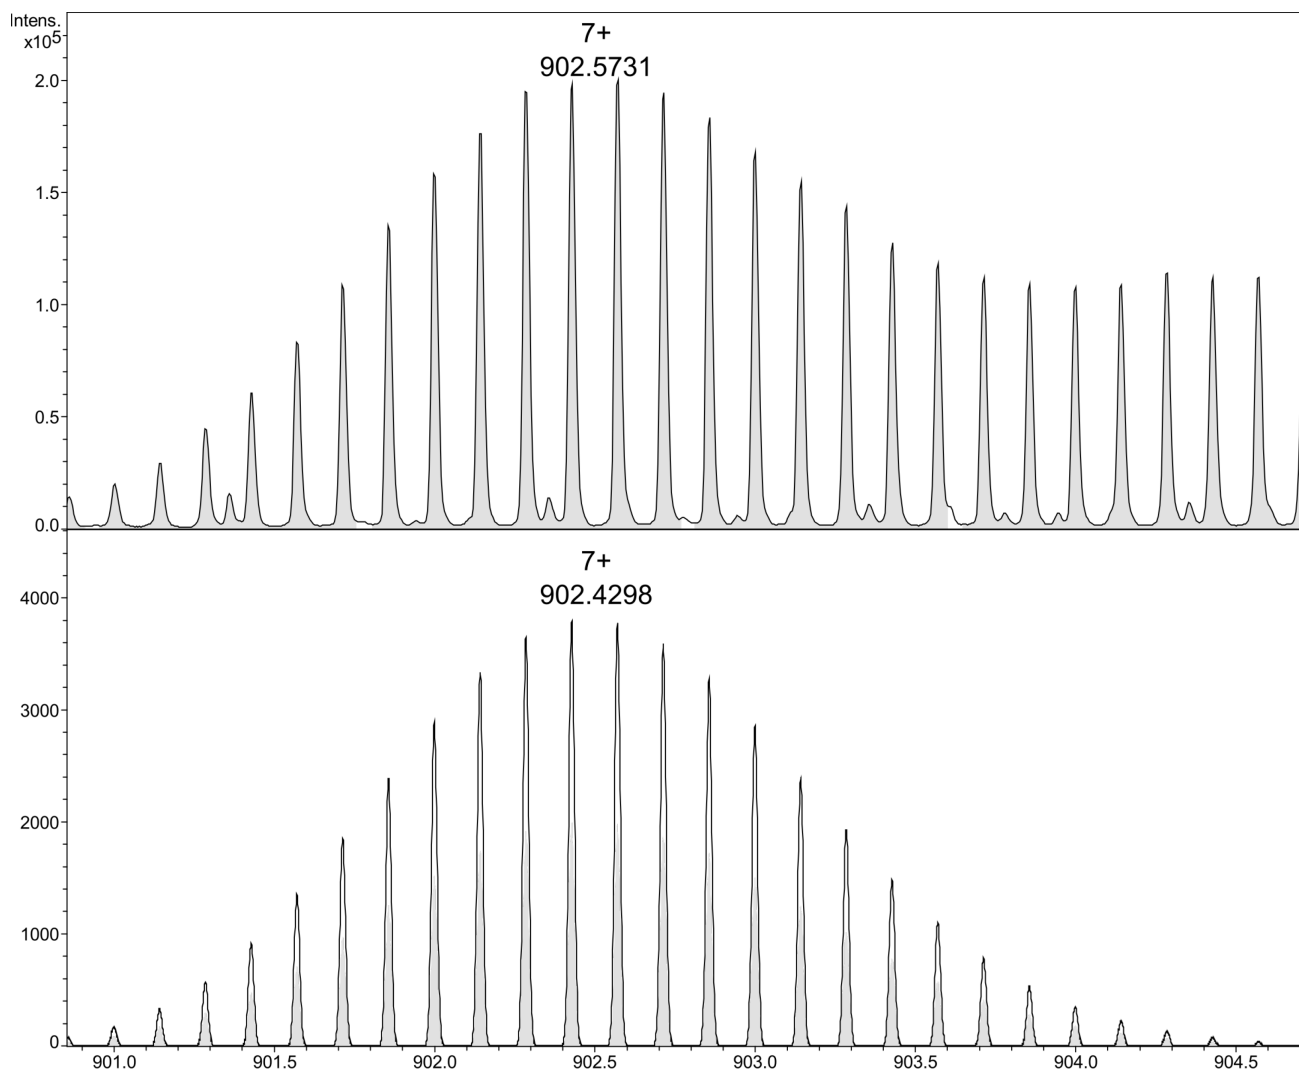

**Figure S 66.** Expanded spectrum for the charged species  $[Fe_4(Zn-L)_6(L3)_2(OTf)_1]^{7+}$  observed (above) in the CSI mass spectrum of the host-guest complex  $(L3)_2@Fe_4(Zn-L)_6$  and simulated isotopic distribution (below). The shoulder on the observed signal belongs to the same species with an oxidized phosphine.

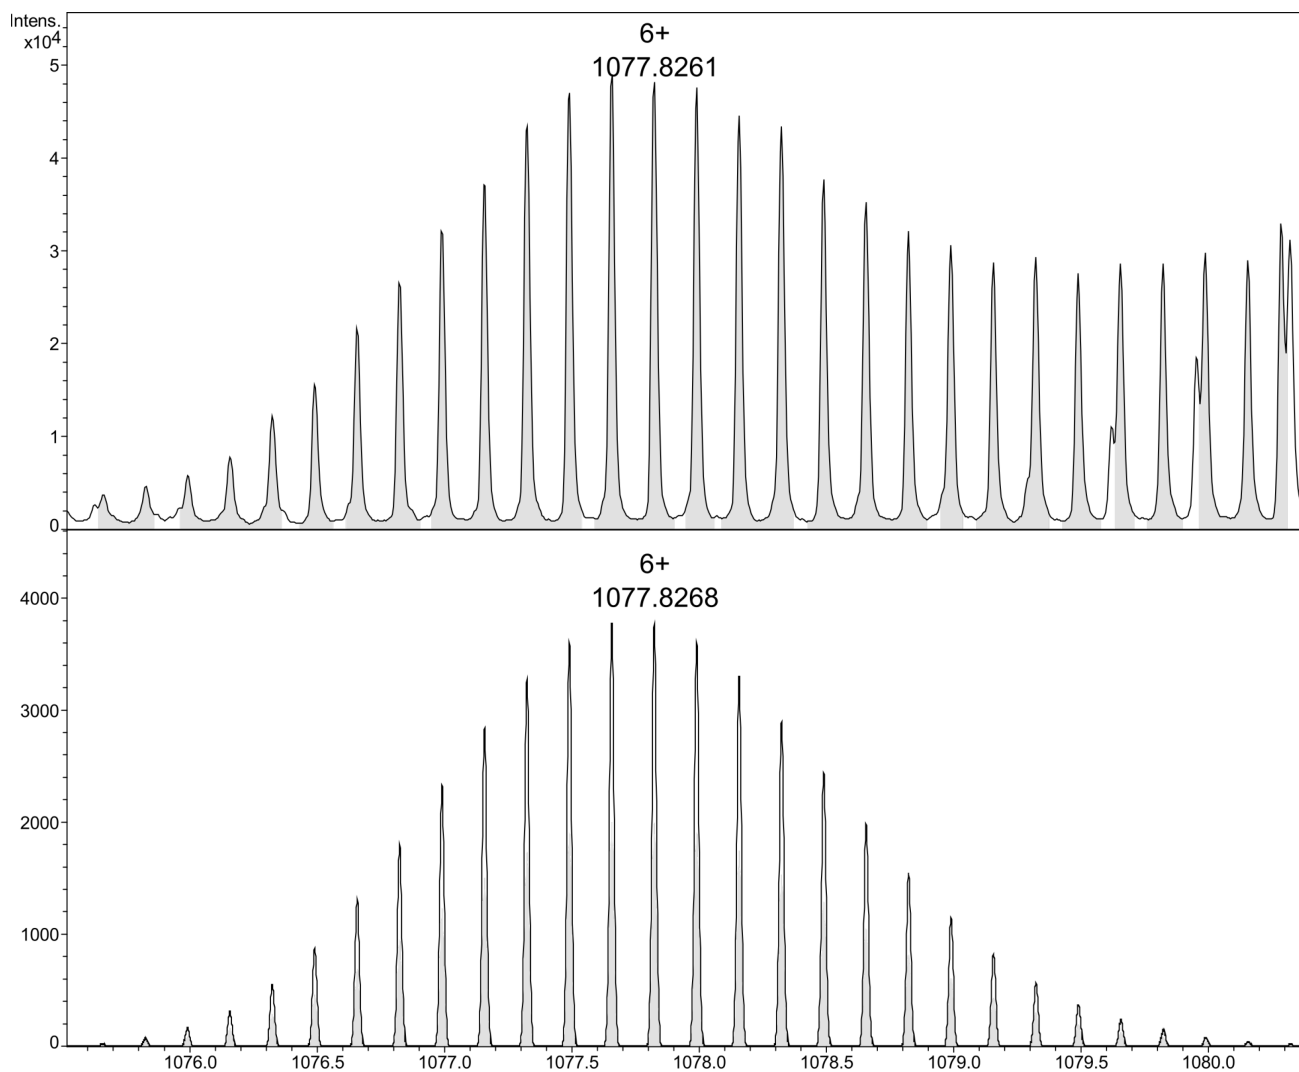

**Figure S 67.** Expanded spectrum for the charged species  $[\text{Fe}_4(\text{Zn-L})_6(\text{L3})_2(\text{OTf})_2]^{6+}$  observed (above) in the CSI mass spectrum of the host-guest complex  $(\text{L3})_2@(\text{Zn-L})_6$  and simulated isotopic distribution (below). The shoulder on the observed signal belongs to the same species with an oxidized phosphine.

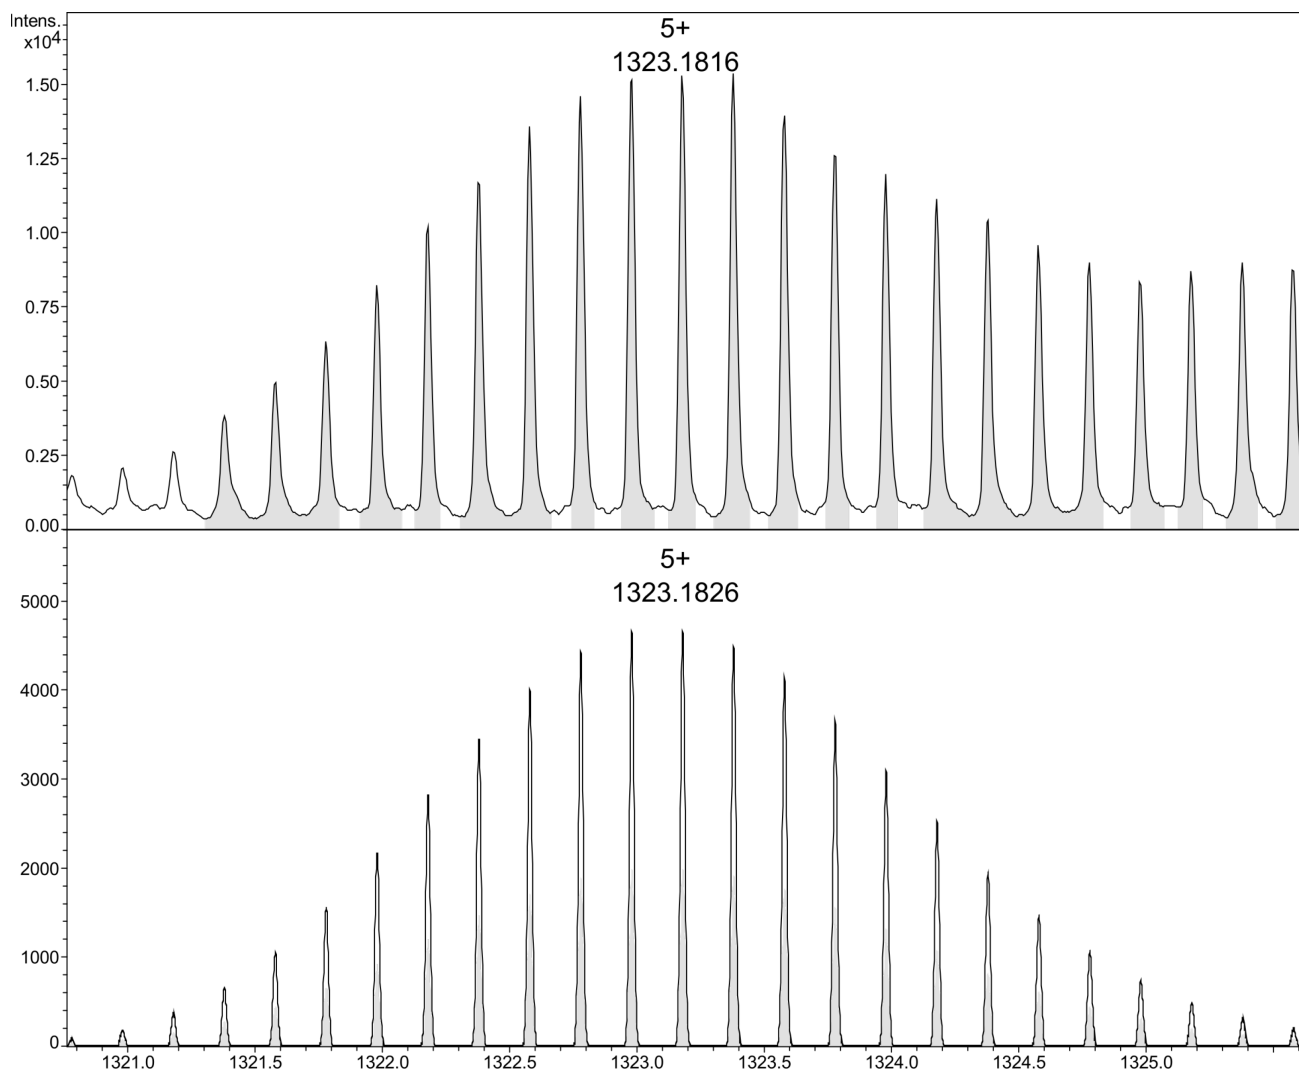

**Figure S 68.** Expanded spectrum for the charged species  $[Fe_4(Zn-L)_6(L3)_2(OTf)_3]^{5+}$  observed (above) in the CSI mass spectrum of the host-guest complex  $(L3)_2@Fe_4(Zn-L)_6$  and simulated isotopic distribution (below). The shoulder on the observed signal belongs to the same species with an oxidized phosphine.

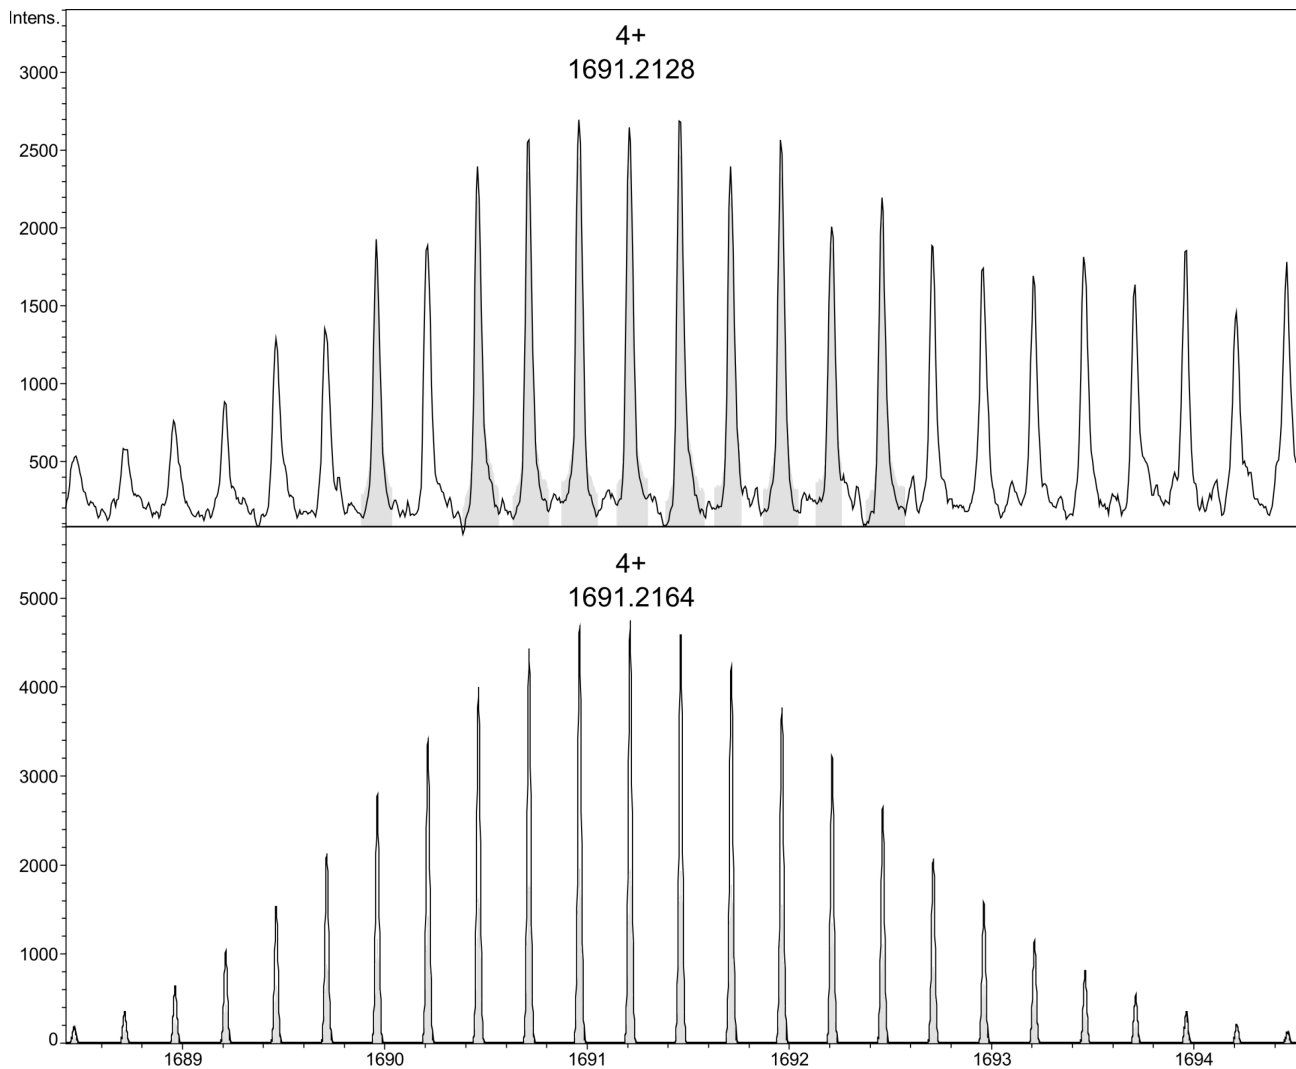

**Figure S 69.** Expanded spectrum for the charged species  $[\text{Fe}_4(\text{Zn-L})_6(\text{L3})_2(\text{OTf})_4]^{4+}$  observed (above) in the CSI mass spectrum of the host-guest complex  $(\text{L3})_2@(\text{Fe}_4(\text{Zn-L})_6)$  and simulated isotopic distribution (below). The shoulder on the observed signal belongs to the same species with an oxidized phosphine.

Encapsulation study of  $\text{Fe}_4(\text{Zn-L})_6$  and  $\text{PPh}_3$

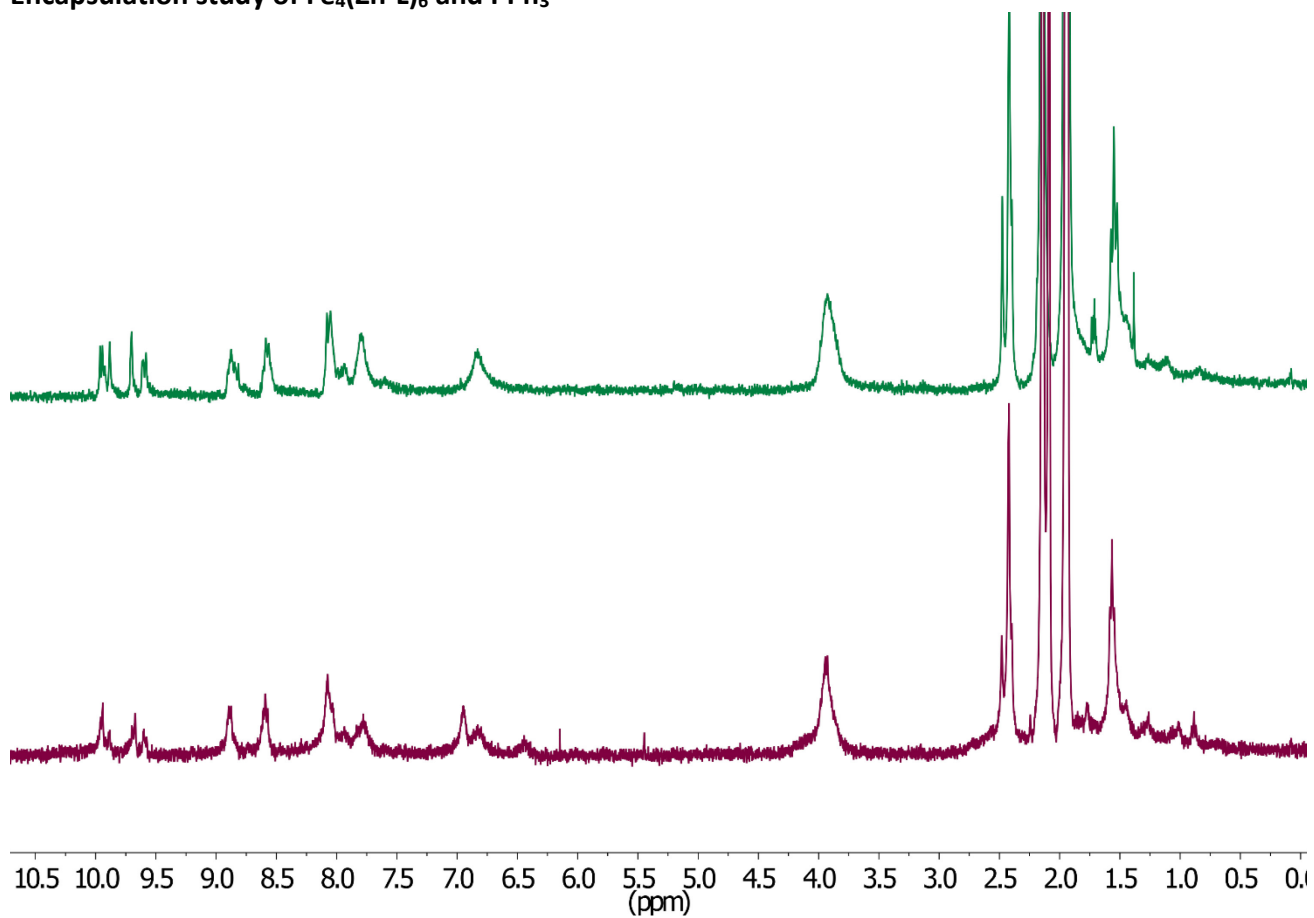

**Figure S 70.**  $^1\text{H}$  NMR (400 MHz, 298 K) of  $\text{Fe}_4(\text{Zn-L})_6$  (top) and a mixture of  $\text{PPh}_3$  and  $\text{Fe}_4(\text{Zn-L})_6$  (bottom) in  $\text{CD}_3\text{CN}$ .

## Encapsulation study of $\text{Fe}_4(\text{Zn-L})_6$ and Au1

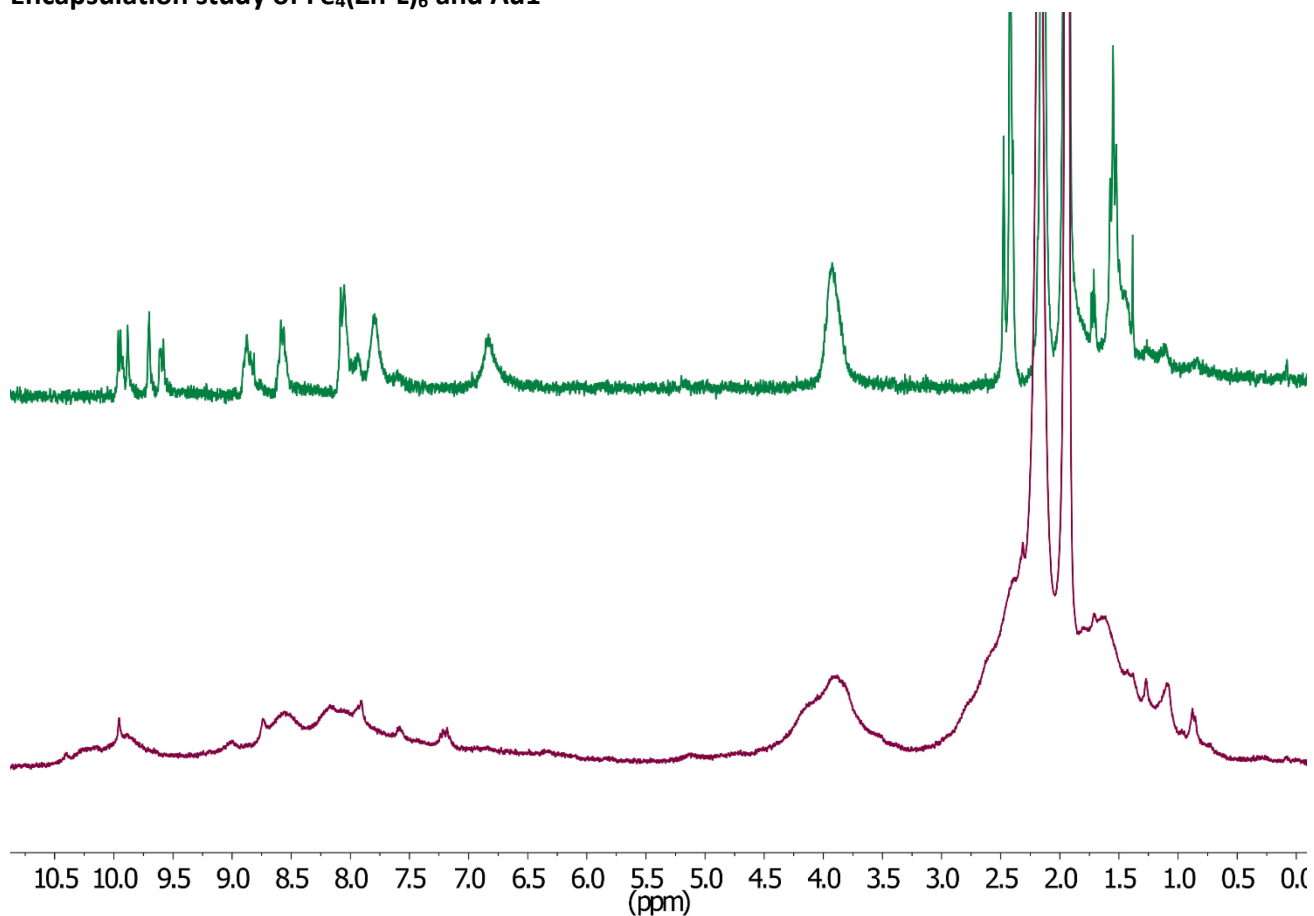

Figure S 71.  $^1\text{H}$  NMR (300 MHz, 298 K) of  $\text{Fe}_4(\text{Zn-L})_6$  (top) and  $\text{Au1@Fe}_4(\text{Zn-L})_6$  (bottom) in  $\text{CD}_3\text{CN}$ .

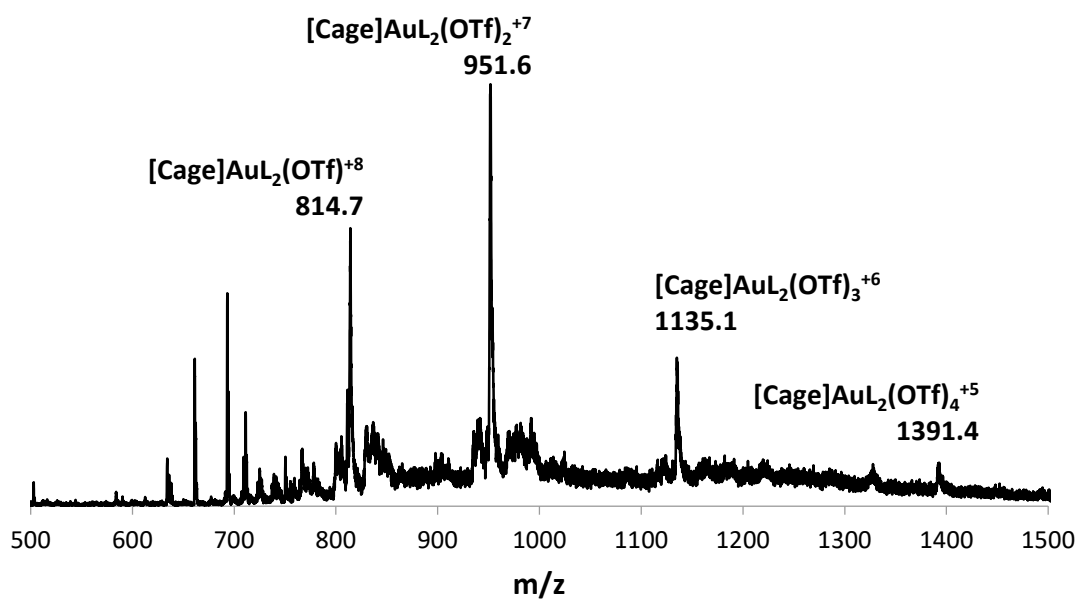

Figure S 72. ESI-MS spectrum of  $\text{Au1@Fe}_4(\text{Zn-L})_6$ . In the image  $L = \text{L3}$ .

## 9. Formation and characterization of the active species

### Encapsulation study of $\text{Fe}_4(\text{Zn-L})_6$ and Rh4 complex

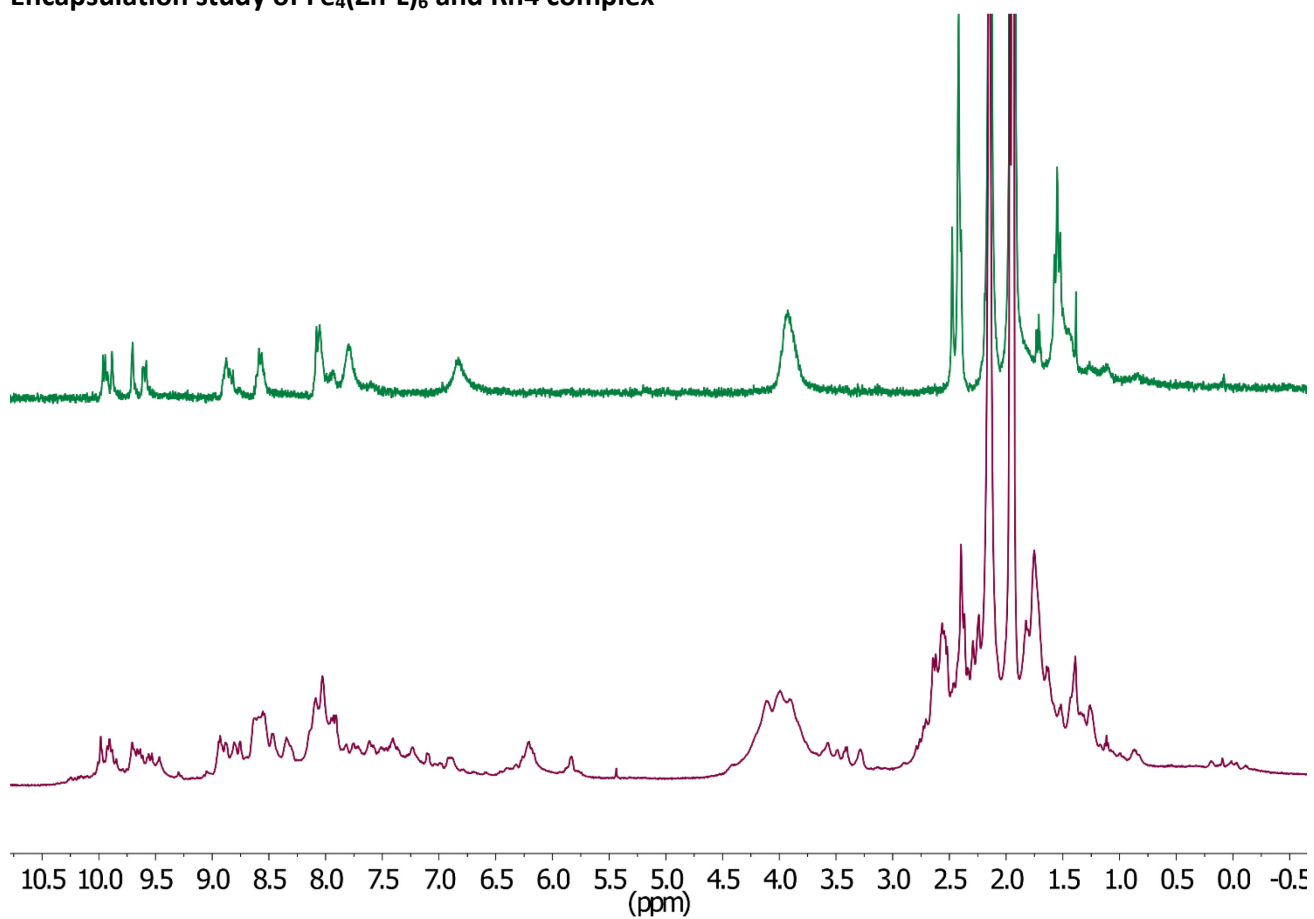

**Figure S 73.**  $^1\text{H}$  NMR (500 MHz, 298 K) of  $\text{Fe}_4(\text{Zn-L})_6$  (top) and  $\text{Rh4@Fe}_4(\text{Zn-L})_6$  (bottom) in  $\text{CD}_3\text{CN}$ . The bottom spectrum contains a 1:2:1 mixture of  $\text{Rh}(\text{acac})(\text{CO})_2$ , **L3** and  $\text{Fe}_4(\text{Zn-L})_6$ .

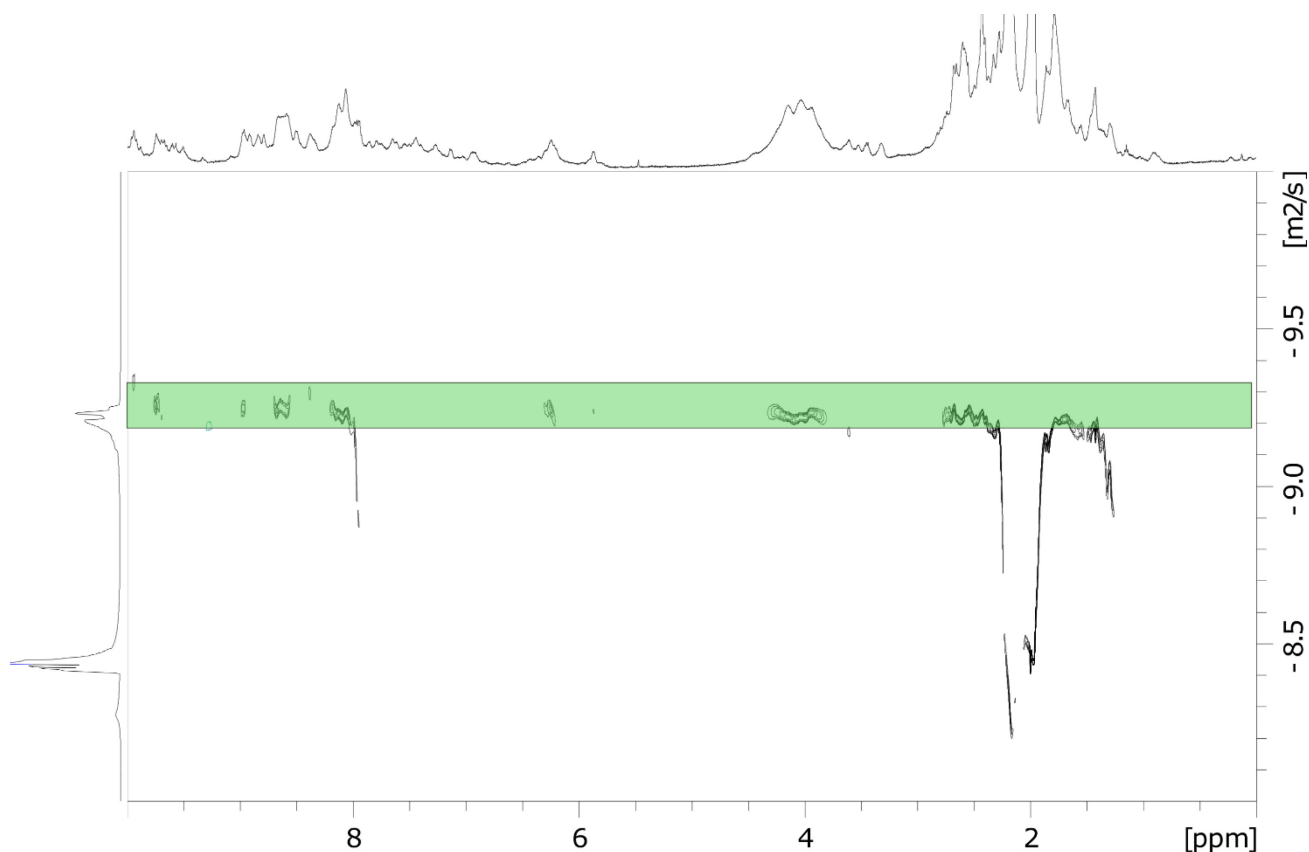

**Figure S 74.**  $^1\text{H}$  NMR (298 K) of  $\text{Fe}_4(\text{Zn-L})_6$  (top) and  $\text{Rh}_4@ \text{Fe}_4(\text{Zn-L})_6$  (bottom) in  $\text{CD}_3\text{CN}$ . The spectrum contains a 1:2:1 mixture of  $\text{Rh}(\text{acac})(\text{CO})_2$ , **L3** and  $\text{Fe}_4(\text{Zn-L})_6$ .

**Table S 11.** Different charged species observed in the CSI mass spectrum of the host-guest complex  $\text{Rh}_4@ \text{Fe}_4(\text{Zn-L})_6$  and the corresponding found and calculated [m/z].

| Species                                                                                        | Charge | Found [m/z] | Calculated [m/z] |
|------------------------------------------------------------------------------------------------|--------|-------------|------------------|
| $\text{Fe}_4(\text{Zn-L})_6(\text{Rh})_1(\text{L3})_2(\text{CO})_1(\text{Cl})_1(\text{OTf})_0$ | 8+     | 791.8678    | 791.8656         |
| $\text{Fe}_4(\text{Zn-L})_6(\text{Rh})_1(\text{L3})_2(\text{CO})_1(\text{Cl})_1(\text{OTf})_1$ | 7+     | 926.2679    | 926.2681         |
| $\text{Fe}_4(\text{Zn-L})_6(\text{Rh})_1(\text{L3})_2(\text{CO})_1(\text{Cl})_1(\text{OTf})_3$ | 5+     | 1356.3585   | 1356.3564        |
| $\text{Fe}_4(\text{Zn-L})_6(\text{Rh})_1(\text{L3})_2(\text{CO})_1(\text{Cl})_1(\text{OTf})_4$ | 4+     | 1732.6842   | 1732.6836        |



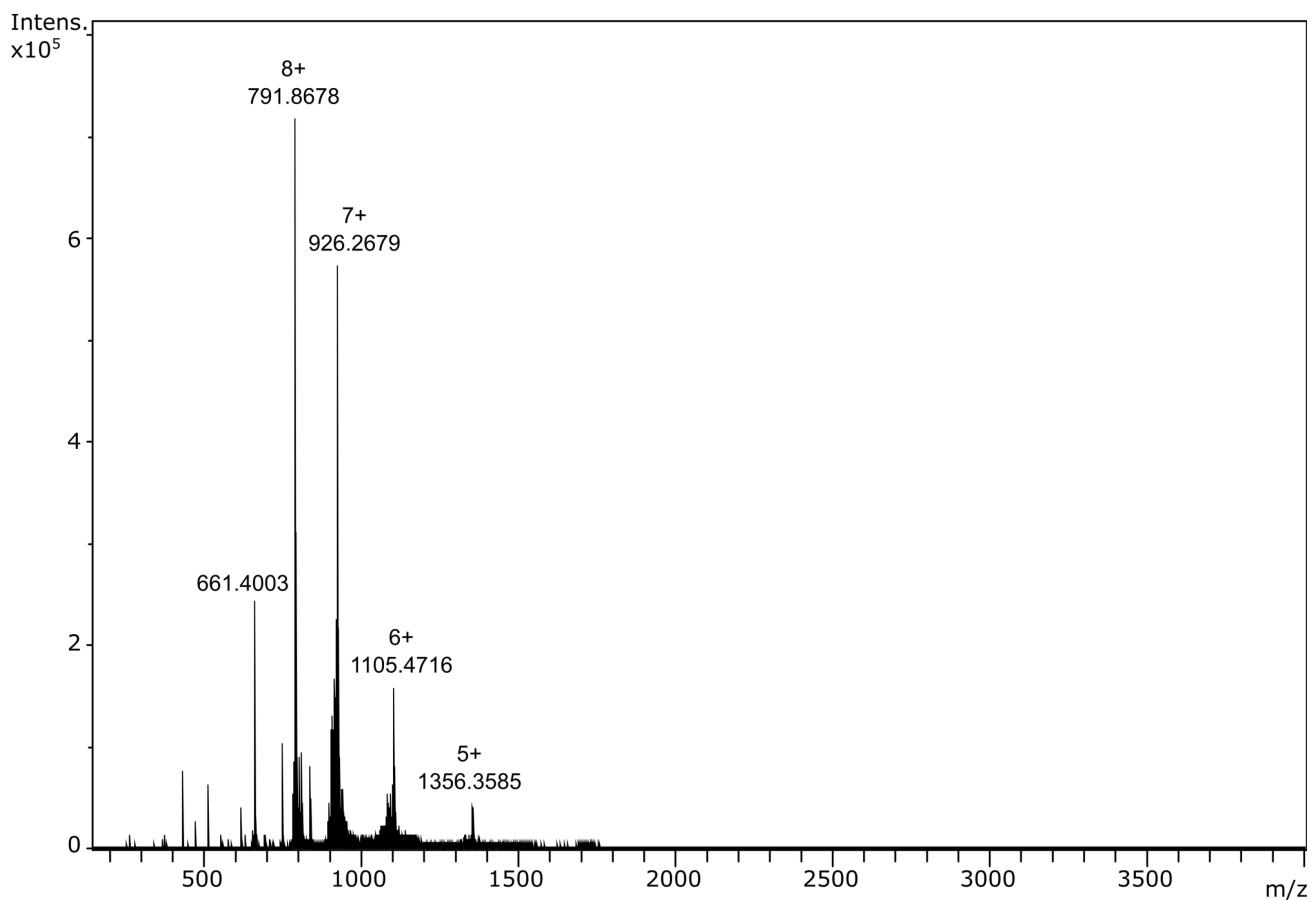

**Figure S 75.** CSI mass spectrum (full spectrum) of the host-guest complex **Rh4@Fe<sub>4</sub>(Zn-L)<sub>6</sub>** with a spray temperature of -40 °C and a dry gas temperature of -35 °C. The peak with m/z ratio of 661 belongs to demetallated **Zn-P**.

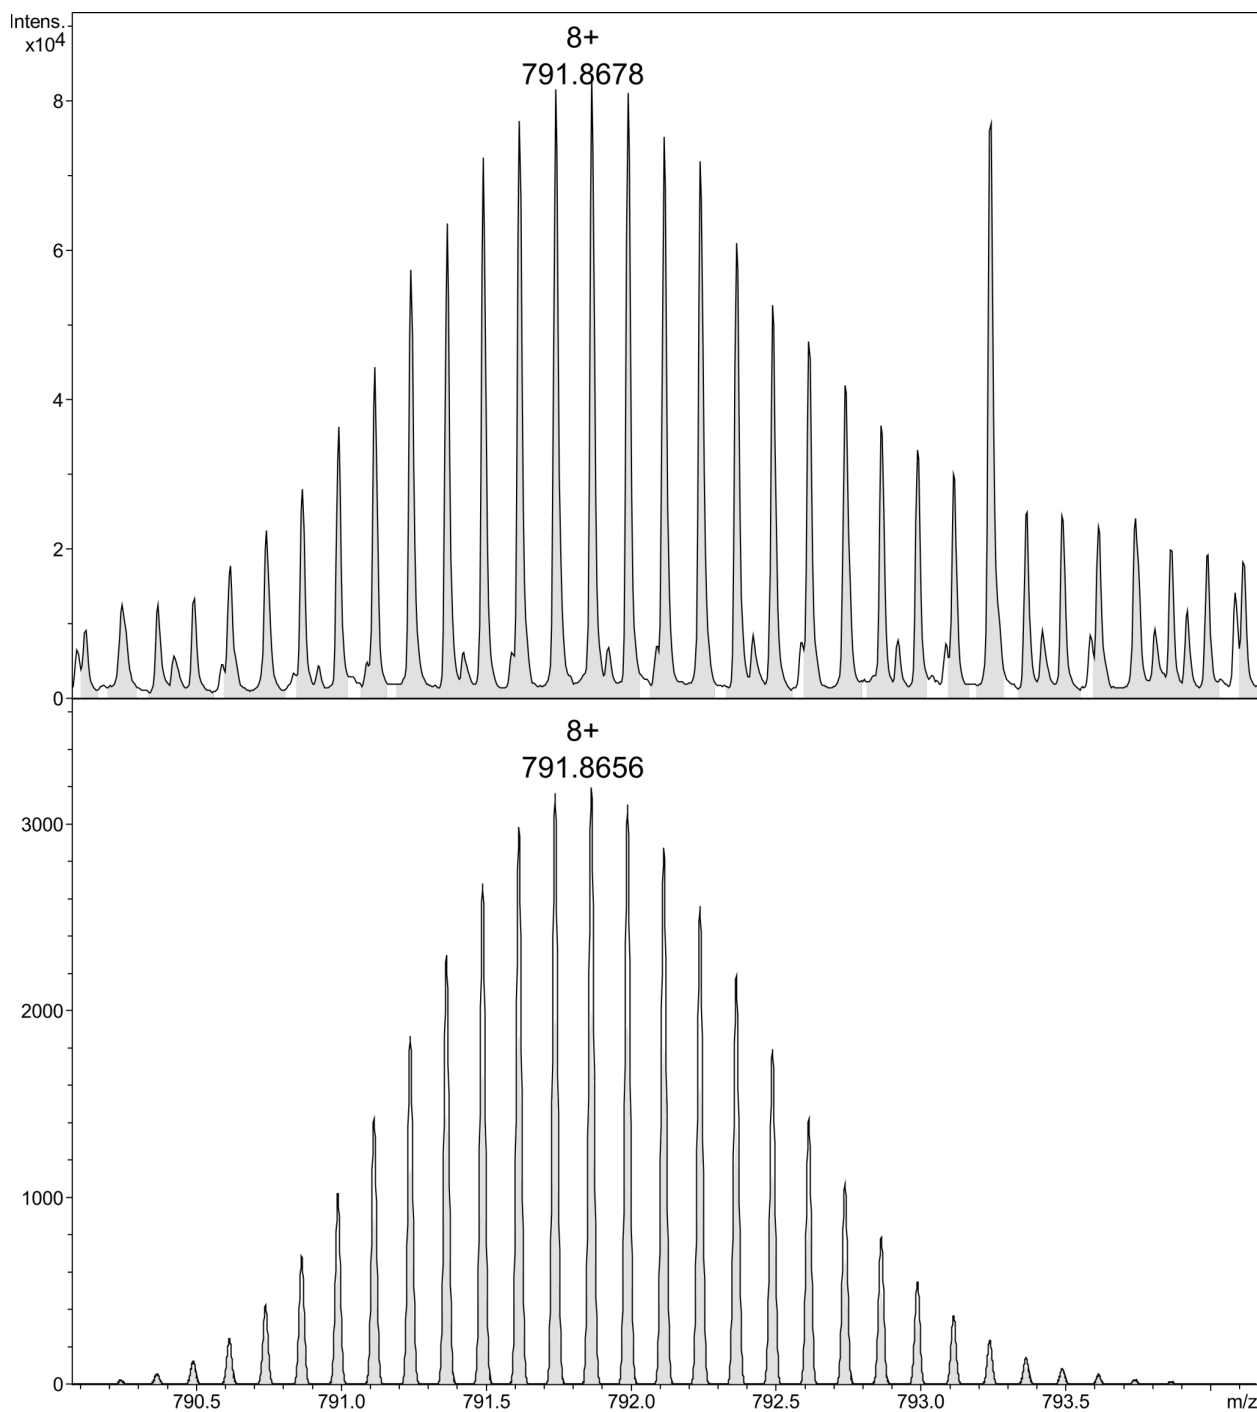

**Figure S 76.** Expanded spectrum for the charged species  $[\text{Fe}_4(\text{Zn-L})_6(\text{Rh})_1(\text{L3})_2(\text{CO})_1(\text{Cl})_1(\text{OTf})_0]^{8+}$  observed (above) in the CSI mass spectrum of the host-guest complex **Rh4@Fe<sub>4</sub>(Zn-L)<sub>6</sub>** and simulated isotopic distribution (below).

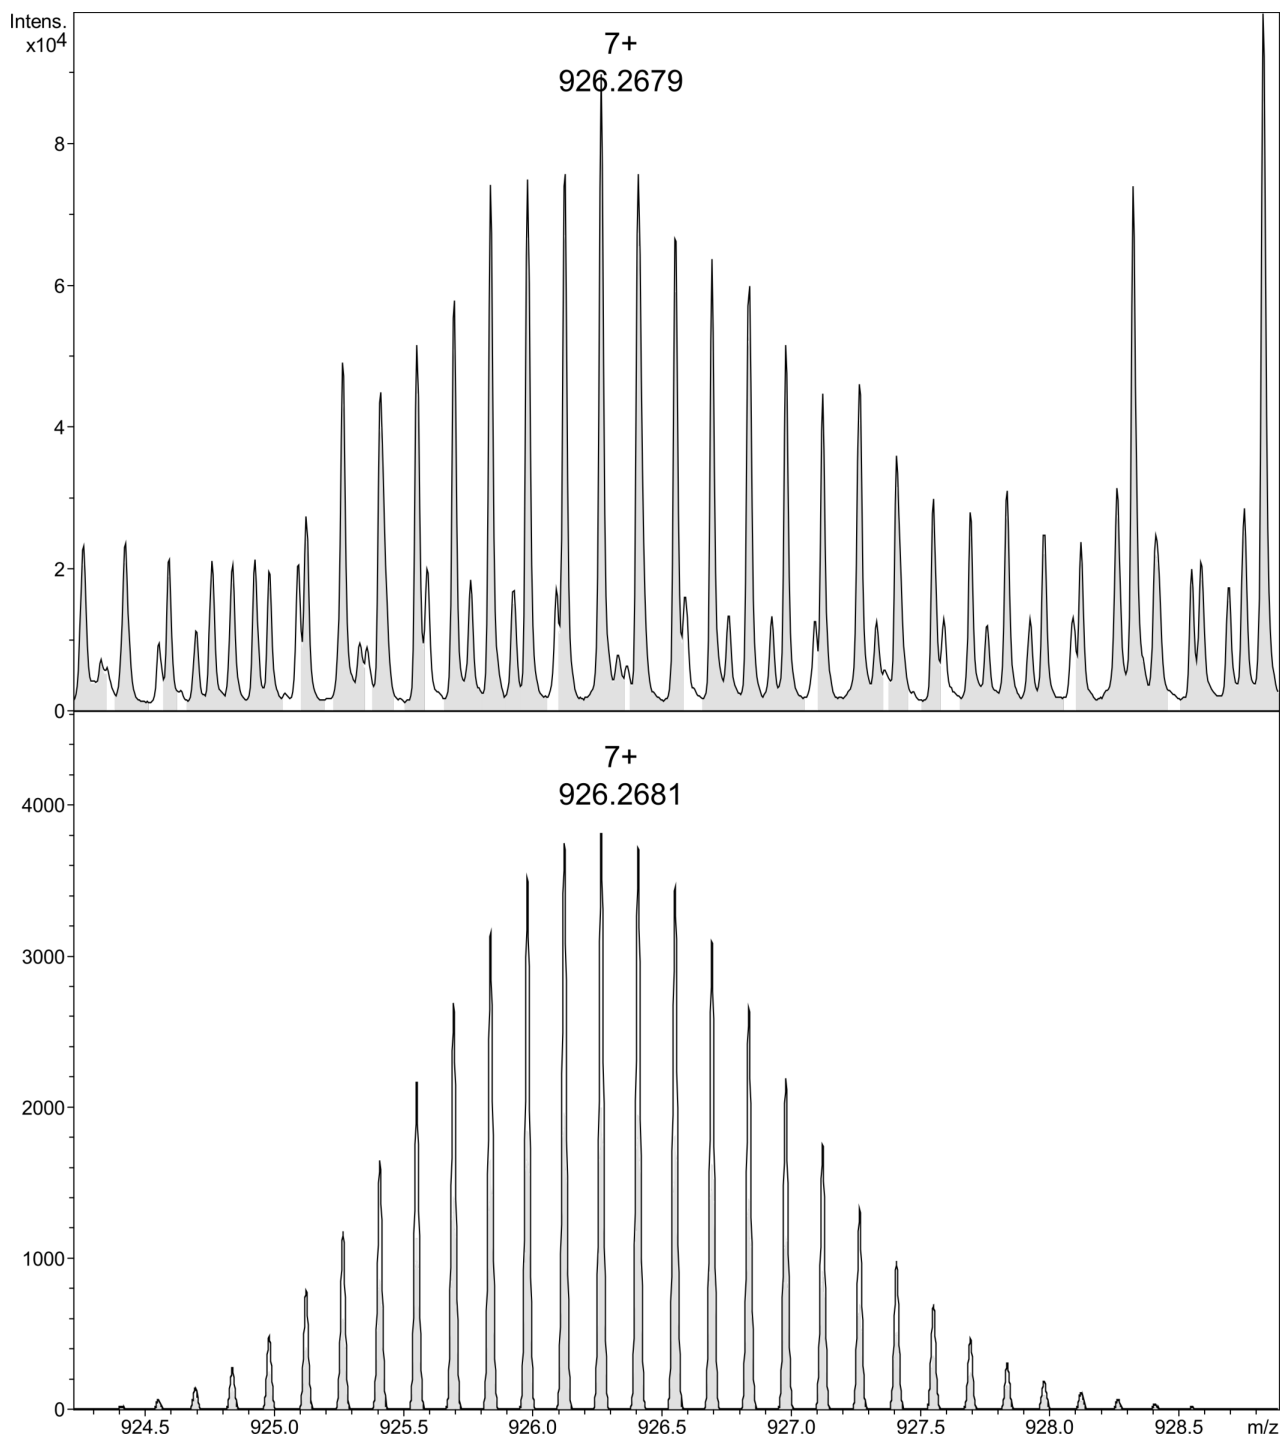

**Figure S 77.** Expanded spectrum for the charged species  $[\text{Fe}_4(\text{Zn-L})_6(\text{Rh})_1(\text{L3})_2(\text{CO})_1(\text{Cl})_1(\text{OTf})_1]^{7+}$  observed (above) in the CSI mass spectrum of the host-guest complex **Rh4@Fe<sub>4</sub>(Zn-L)<sub>6</sub>** and simulated isotopic distribution (below).

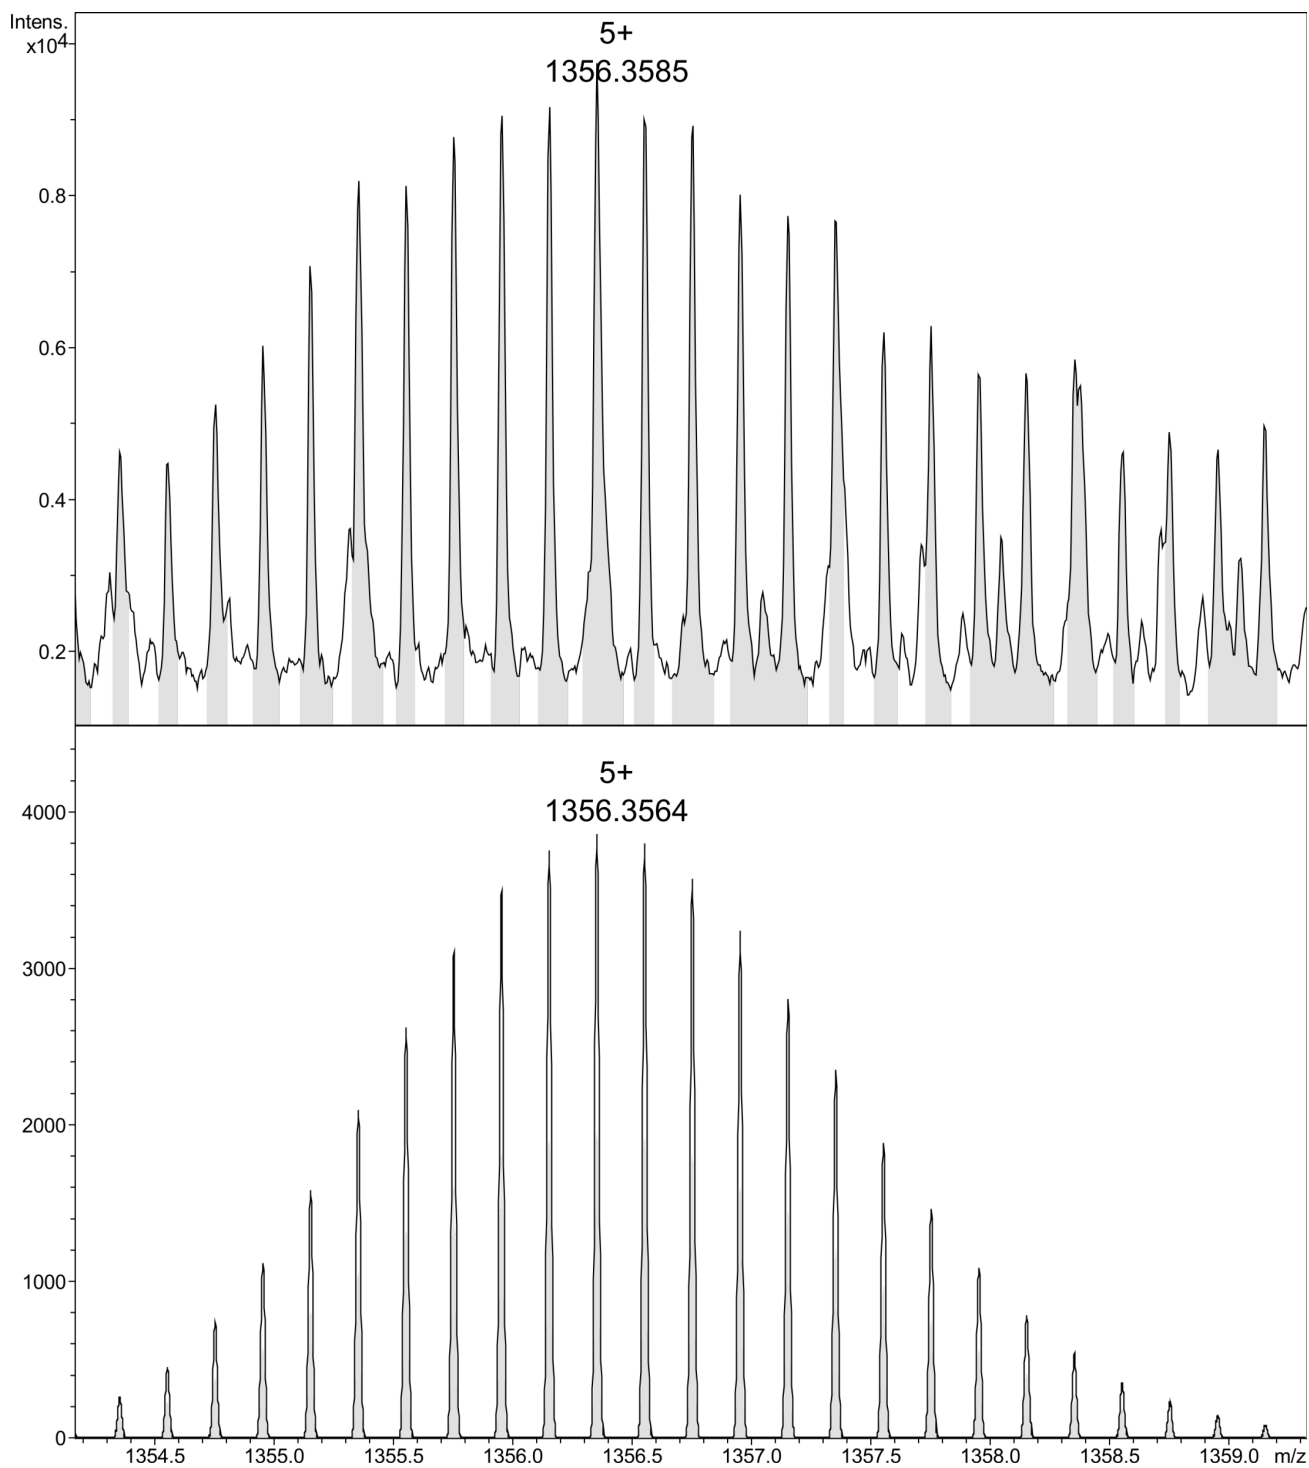

**Figure S 78.** Expanded spectrum for the charged species  $[\text{Fe}_4(\text{Zn-L})_6(\text{Rh})_1(\text{L3})_2(\text{CO})_1(\text{Cl})_1(\text{OTf})_3]^{5+}$  observed (above) in the CSI mass spectrum of the host-guest complex **Rh4@Fe<sub>4</sub>(Zn-L)<sub>6</sub>** and simulated isotopic distribution (below).

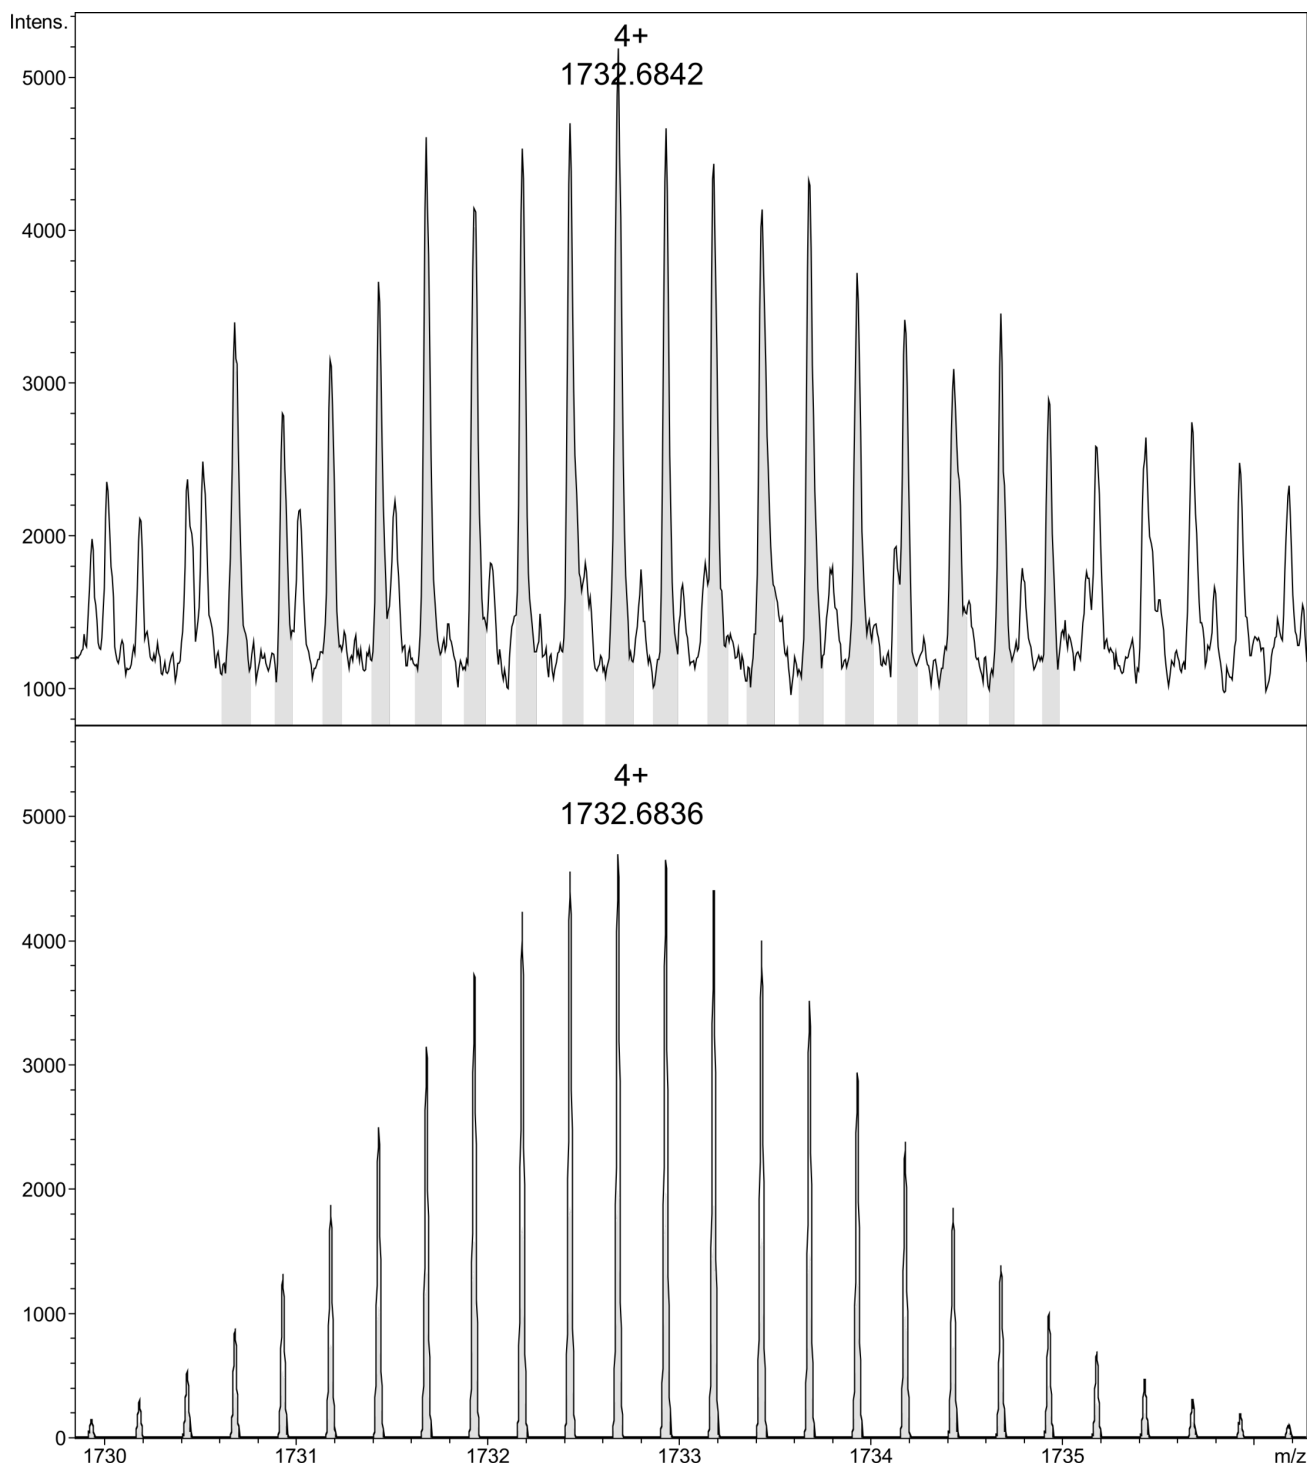

**Figure S 79.** Expanded spectrum for the charged species  $[\text{Fe}_4(\text{Zn-L})_6(\text{Rh})_1(\text{L3})_2(\text{CO})_1(\text{Cl})_1(\text{OTf})_4]^{4+}$  observed (above) in the CSI mass spectrum of the host-guest complex **Rh4@Fe<sub>4</sub>(Zn-L)<sub>6</sub>** and simulated isotopic distribution (below).

### Characterisation of the active species by $^1\text{H}$ NMR spectroscopy

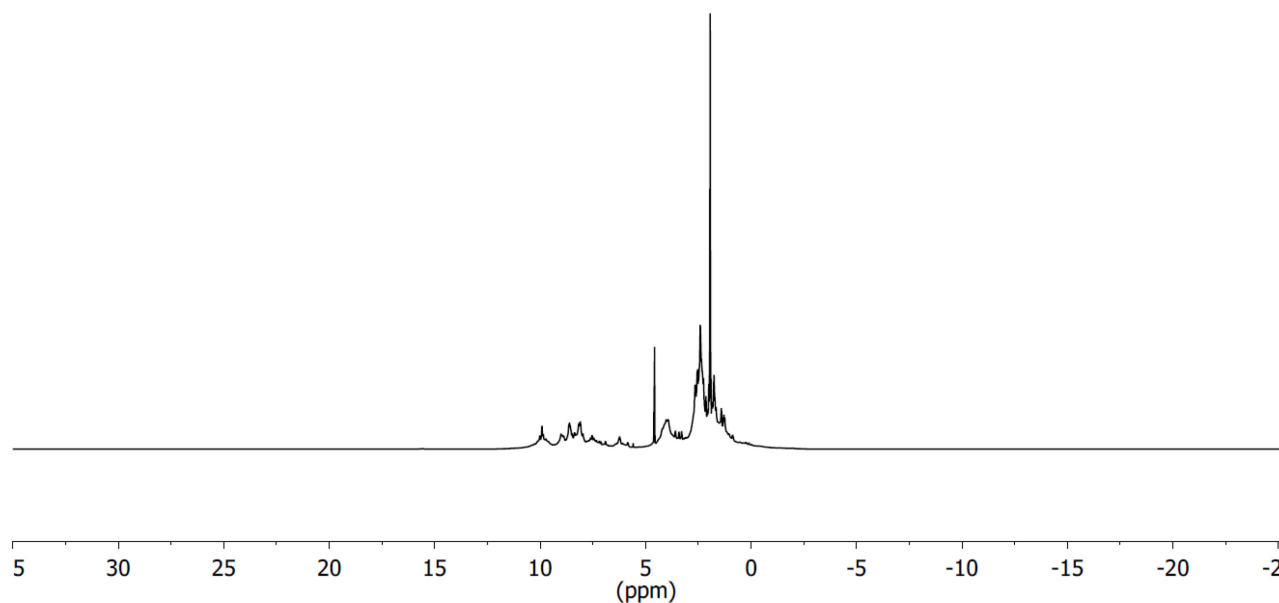

**Figure S 80.** High pressure  $^1\text{H}$  NMR (500 MHz, 298 K, 7 bar syngas) of the active species formed from  $\text{Rh4@Fe}_4(\text{Zn-L})_6$ . Hydride signals could not be detected.

### Characterisation of the active species by IR spectroscopy

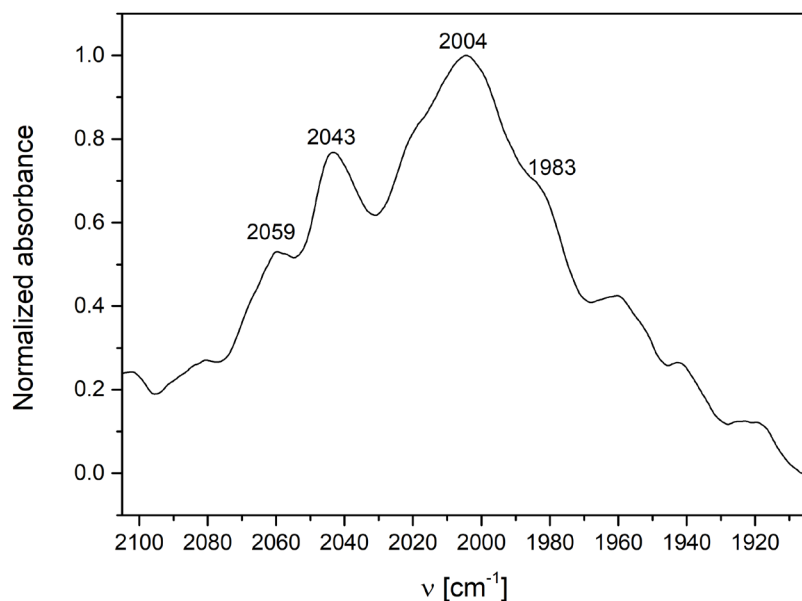

**Figure S 81.** IR spectrum (298 K) of a 1:2 mixture of  $\text{Rh}(\text{acac})(\text{CO})_2$  and **L3** in acetonitrile under 20 bar syngas.  $[\text{Rh}] = 1.3$  mM and  $[\text{L3}] = 2.6$  mM.

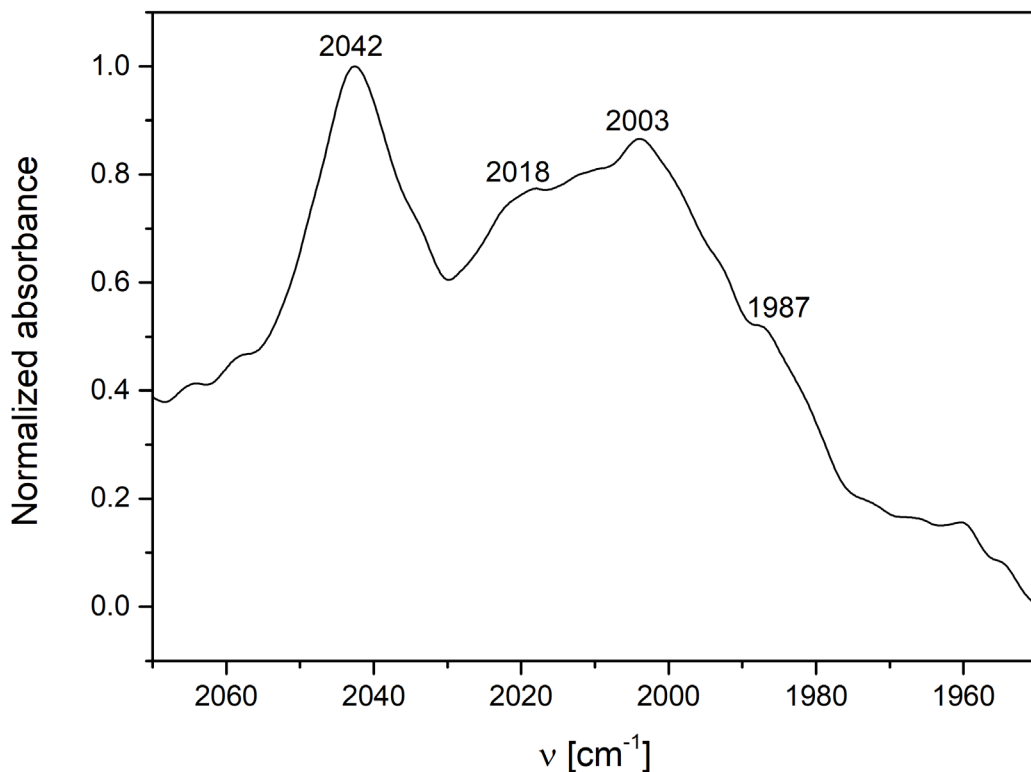

**Figure S 82.** IR spectrum (298 K) of a 1:2 mixture of  $\text{Rh}(\text{acac})(\text{CO})_2$  and **L3** in a 3:2 mixture of acetonitrile and dichloromethane under 20 bar syngas.  $[\text{Rh}] = 1.3 \text{ mM}$  and  $[\text{L3}] = 2.6 \text{ mM}$ .

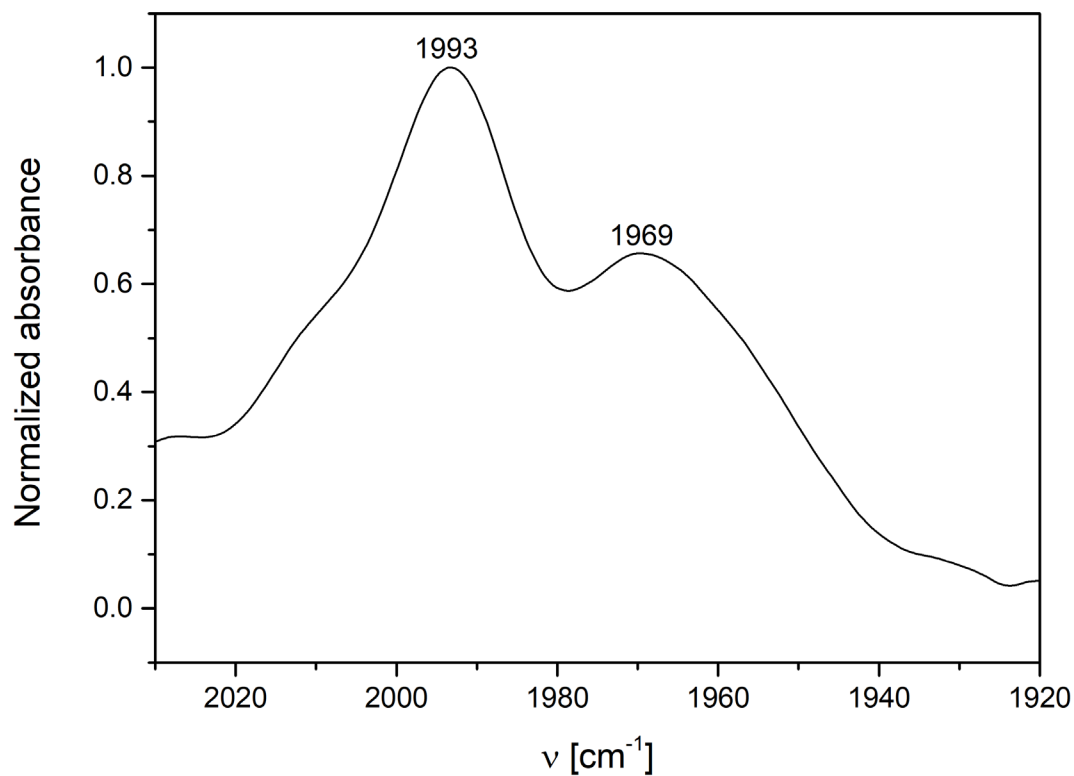

**Figure S 83.** IR spectrum (298 K) of a 1:2:1 mixture of  $\text{Rh}(\text{acac})(\text{CO})_2$ , **L3** and  $\text{Fe}_4(\text{Zn-L})_6$  in a 3:2 mixture of acetonitrile and dichloromethane under 20 bar syngas.  $[\text{Rh}] = [\text{Fe}_4(\text{Zn-L})_6] = 1.3 \text{ mM}$  and  $[\text{L3}] = 2.6 \text{ mM}$ .

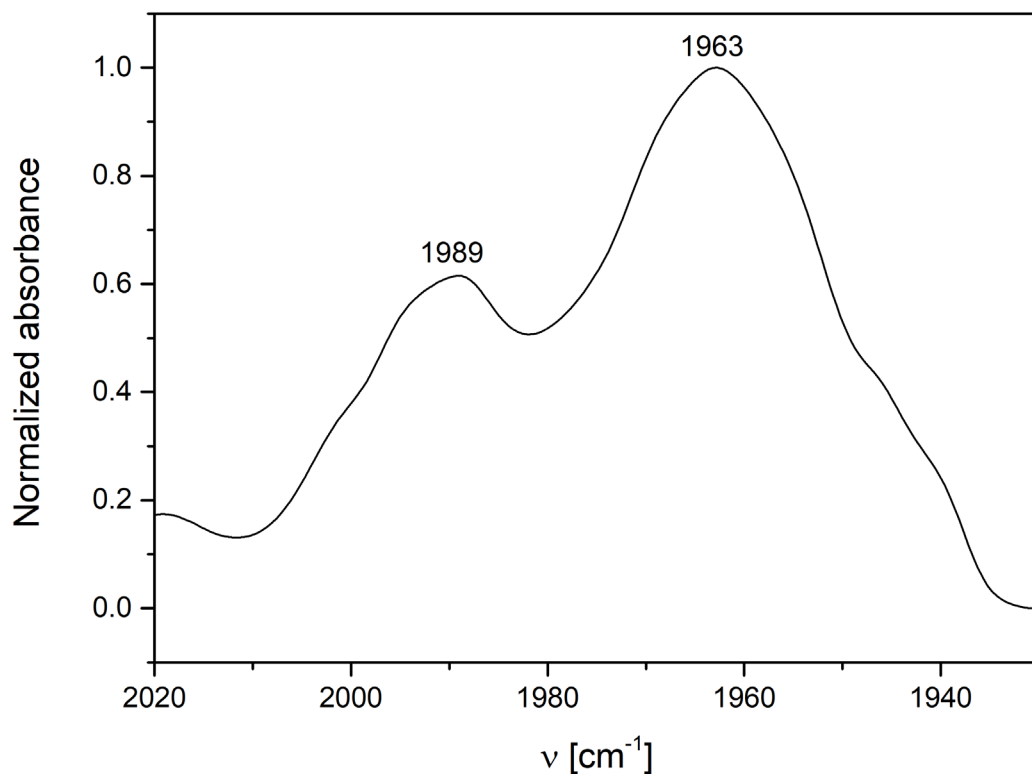

**Figure S 84.** IR spectrum (298 K) of a 1:2:1 mixture of  $\text{Rh}(\text{acac})(\text{CO})_2$ , **L3** and  $\text{Fe}_4(\text{Zn-L})_6$  in a 3:2 mixture of acetonitrile and dichloromethane under 20 bar  $\text{D}_2/\text{CO}$ .  $[\text{Rh}] = [\text{Fe}_4(\text{Zn-L})_6] = 1.3 \text{ mM}$  and  $[\text{L3}] = 2.6 \text{ mM}$ .

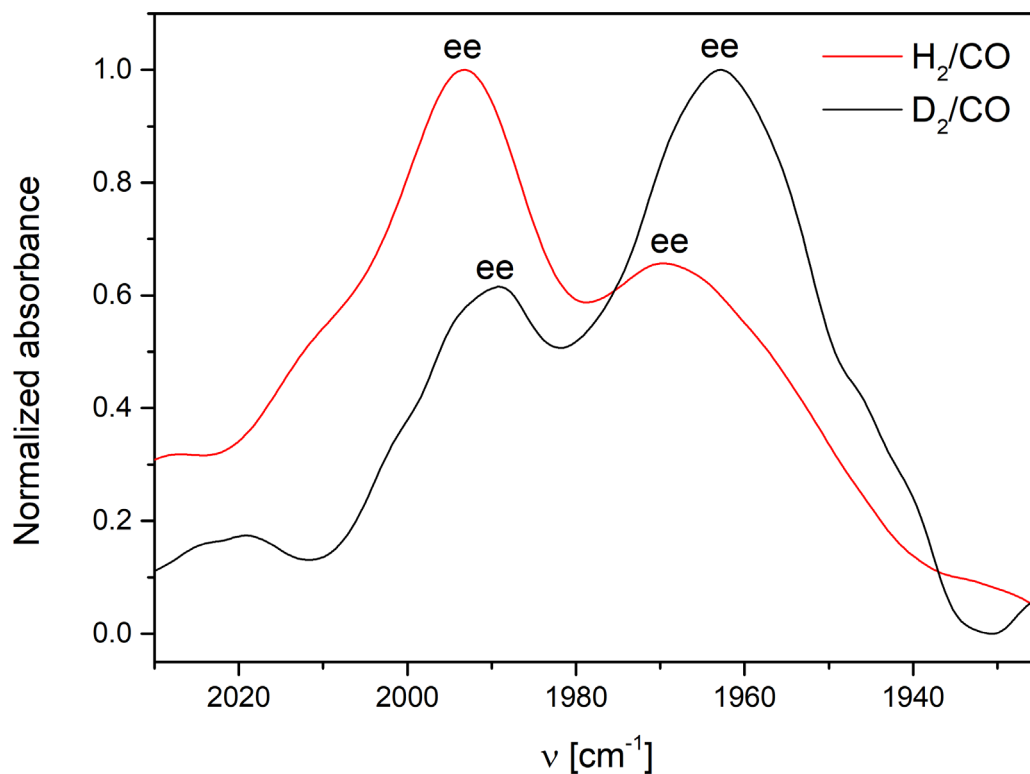

**Figure S 85.** Overlapped IR spectra (298 K) of a 1:2:1 mixture of  $\text{Rh}(\text{acac})(\text{CO})_2$ , **L3** and  $\text{Fe}_4(\text{Zn-L})_6$  in a 3:2 mixture of acetonitrile and dichloromethane under 20 bar  $\text{H}_2/\text{CO}$  and  $\text{D}_2/\text{CO}$ , respectively.  $[\text{Rh}] = [\text{Fe}_4(\text{Zn-L})_6] = 1.3 \text{ mM}$  and  $[\text{L3}] = 2.6 \text{ mM}$ .



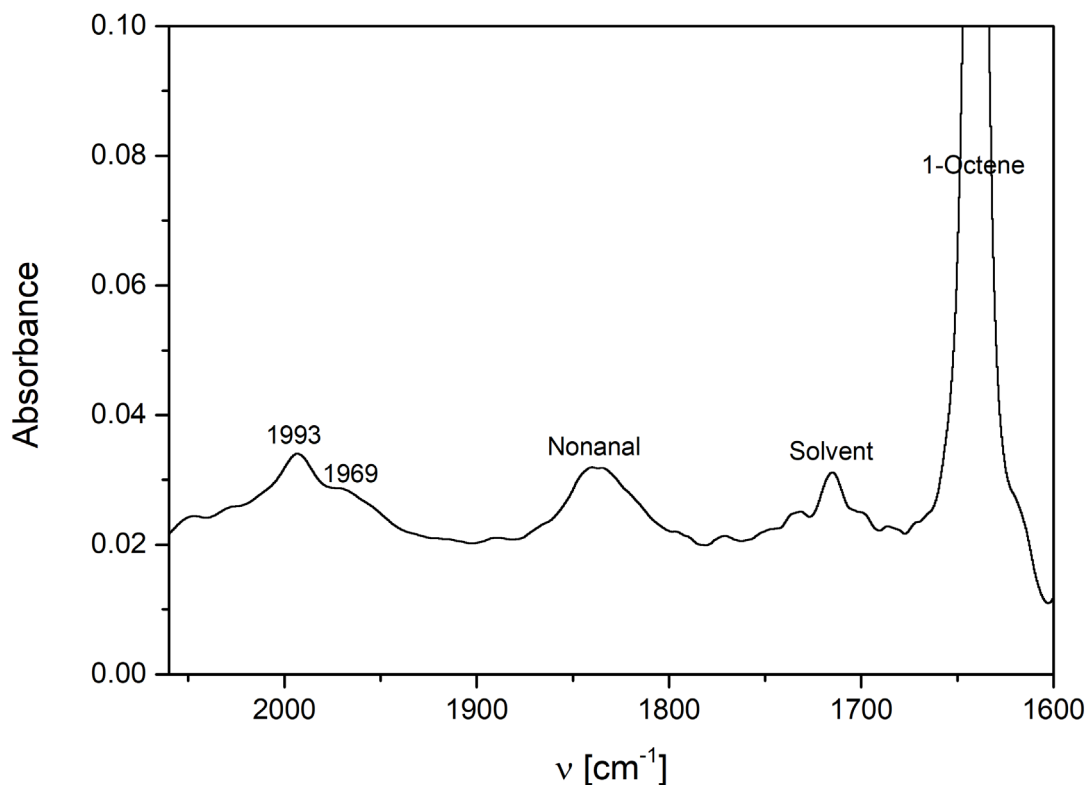

**Figure S 86.** IR spectrum (298 K) of a 1:2:1:200 mixture of Rh(acac)(CO)<sub>2</sub>, **L3**, Fe<sub>4</sub>(Zn-L)<sub>6</sub> and 1-octene in a 3:2 mixture of acetonitrile and dichloromethane under 20 bar H<sub>2</sub>/CO. [Rh] = [Fe<sub>4</sub>(Zn-L)<sub>6</sub>] = 1.3 mM, [L3] = 2.6 mM and [1-octene] = 260 mM.

## 10. Cage and guest volume determination

The online utility Voss Volume Voxelator<sup>[8]</sup> was used to calculate the volume of the cavity of the cage (with 0.5 Å small and 12 Å large probe radius) and of the guests (with 2 Å probe radius). A comparison of the surface areas and the volumes is displayed in Table S 12. In Figure S 87 the inner cavity volume of cage Fe<sub>4</sub>(Zn-L)<sub>6</sub> is shown in relation to the full volume of the cage along with the volume the active rhodium species (**ee** isomer) occupies inside the cage.

**Table S 12.** Surface areas and volumes for the cage Fe<sub>4</sub>(Zn-L)<sub>6</sub> and all the guests.

| Entry | Compound                            | Volume (Å <sup>3</sup> ) | Occupancy factor         |
|-------|-------------------------------------|--------------------------|--------------------------|
| 1     | Fe <sub>4</sub> (Zn-L) <sub>6</sub> | 1748                     | -                        |
| 2     | L1                                  | 422                      | 0.24 (1 eq), 0.48 (2 eq) |
| 3     | L2                                  | 412                      | 0.24 (1 eq), 0.47 (2 eq) |
| 4     | L3                                  | 405                      | 0.23 (1 eq), 0.46 (2 eq) |
| 5     | Au1                                 | 498                      | 0.28 (1 eq), 0.57 (2 eq) |
| 6     | Au2                                 | 918                      | 0.53 (1 eq)              |
| 7     | Rh1                                 | 928                      | 0.53 (1 eq)              |
| 8     | Rh3                                 | 570                      | 0.33 (1 eq), 0.65 (2 eq) |

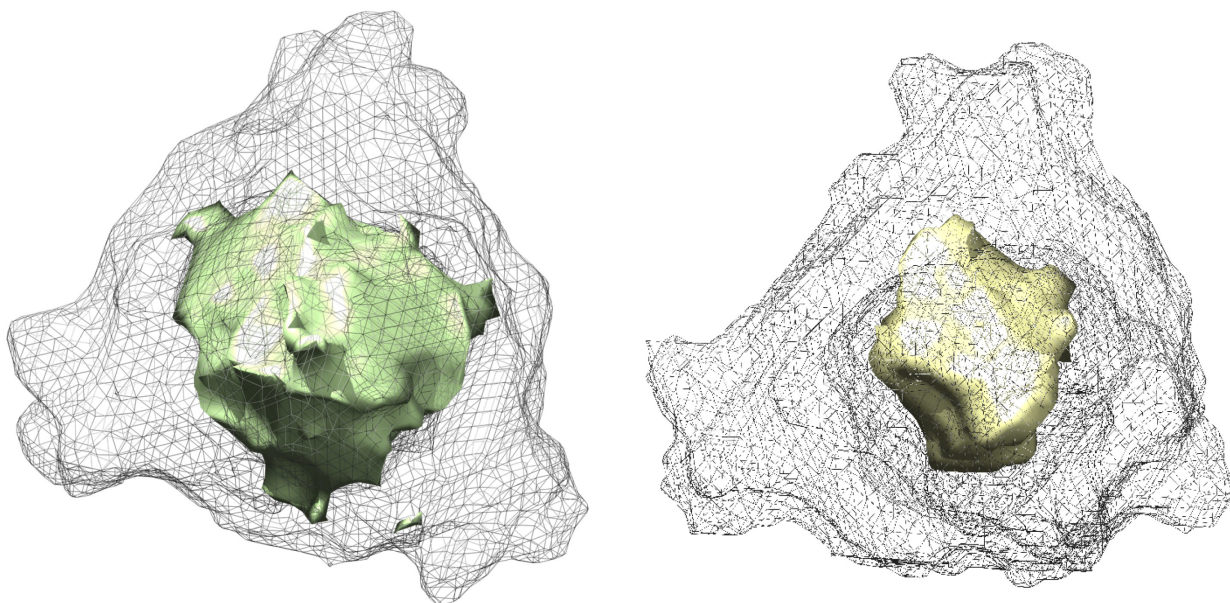

**Figure S 87.** (left) The inner cavity volume of cage  $\text{Fe}_4(\text{Zn-L})_6$ . (right) The volume the active rhodium species (**ee** isomer) occupies inside the cage.

## 11. xTB and DFT calculations

### a) Geometry optimization of catalyst-cage and substrate-catalyst-cage adducts by GFN-xTB

The geometry optimizations of the host-guest complexes were carried out with the program ADF using a tight-binding quantum chemical method (GFN-xTB) that mimics DFT and is useful for large molecular systems.<sup>[9]</sup> The vibrational spectra were computed in ADF using DFT after performing a geometry optimization on the active species structure extracted from the xTB calculated structure and by freezing all atoms except for the hydrido and CO ligands. The functional GGA BLYP-DR(BJDAMP) was used with the DZP basis set with a small frozen core. Three different host-guest complexes were computed using the method described: **Rh1@Fe<sub>4</sub>(Zn-L)<sub>6</sub> (ee isomer)**, **Rh2@Fe<sub>4</sub>(Zn-L)<sub>6</sub> (ea isomer)** and **Rh5@Fe<sub>4</sub>(Zn-L)<sub>6</sub> (P-N complex where one L3 ligand is coordinating to rhodium through the pyridine instead of the phosphorus atom)**. Coordinates of the computed structures are given in a separate file. For **Rh1@Fe<sub>4</sub>(Zn-L)<sub>6</sub> (ee isomer)** the geometries of its adducts with 1-hexene, 1-heptene and 1-octene, respectively, were also optimized using GFN-xTB.

### b) Energies and structures of alkenes calculated by DFT

From the xTB-optimized substrate-catalyst-cage adducts the alkene structure (for 1-hexene, 1-heptene and 1-octene) was extracted and its Gibbs free energy was computed by single point DFT with the functional GGA BLYP-DR(BJDAMP) with the DZP basis set. For comparison, the same alkenes were geometry optimized in the absence of cage followed by calculation of their Gibbs free energy with the same functional as for the encapsulated alkenes.  $\Delta(\text{dG})$  refers to the folding energy obtained by taking the difference in the Gibbs free energy of the folded alkene (in the cage) *versus* the linear one (in the absence of cage).

*c) Odd-even effect in the folding energy*

The odd–even effect most likely arises from an enthalpically more favourable folding of odd numbered alkenes inside the cage. By comparing the folding energies of the encapsulated alkenes, an odd–even effect is clearly distinguishable, where odd numbered alkene 1–heptene shows a thermodynamically more favourable folding inside the cage as opposed to the even–numbered alkenes. This result suggests that odd–numbered alkenes form more stable catalyst–substrate complexes inside the cage as opposed to the even–numbered alkenes, resulting in lower reactivity explaining the observed odd–even effect.

The "alkene end" for C6, C7 and C8 compounds are all similar in structure and are probably very similarly oriented in the catalyst adducts (reactant). The next step in the catalytic cycle is a hydride transfer to the C=C bond, and locally the energy penalty for the TS should be very similar for all of these alkenes. Therefore, it can be expected that the overall TS barrier will depend on the stability of the reactant state. Since the odd alkene chain substrates feature a smaller folding energy, the corresponding reactant state is relatively more stabilized with respect to the even alkene chain counterparts. It is therefore expected that the relative TS barrier for the odd chain alkene substrate would be higher explaining its slower conversion.

It should be noted here that all the folded configurations arise from encapsulation in the cage and interaction with the catalyst. The folded geometries implicitly carry the encapsulation effect which arises from the interaction of the substrate with the cage, and the effect of forming an adduct with the catalyst. It can therefore be inferred that the quantity  $\Delta(dG)$  carries information about the interaction of the substrate with the cage/catalyst. A detailed quantitative analysis would require energy decomposition analysis of the entire system. Such an analysis requires advanced computational calculations, and considering the size of the caged systems are computationally intensive, and outside the scope of the present work. We suggest that the quantity  $\Delta(dG)$  qualitatively captures the interaction of the substrate with cage/catalyst and together with experimental results sufficiently describes the trends observed in this system.

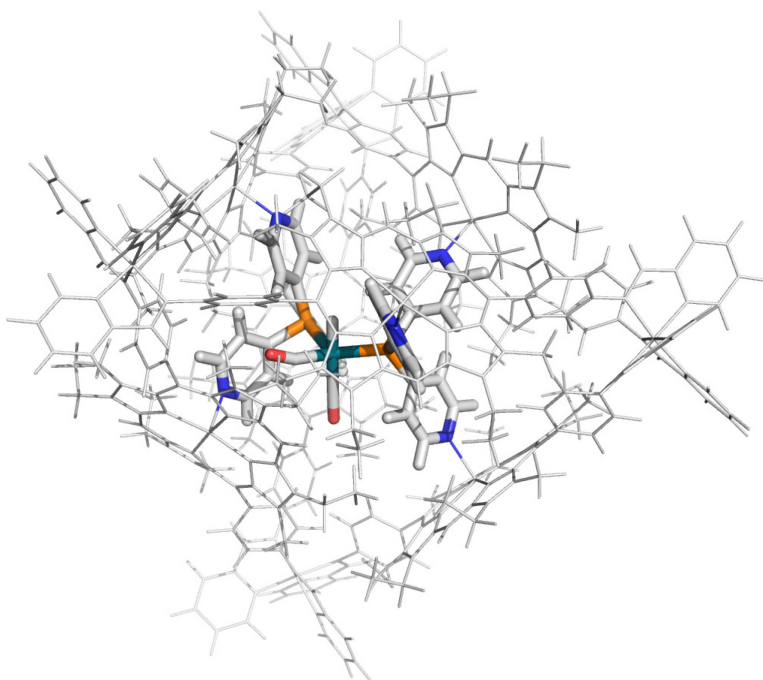

**0 kcal/mol**

**Figure S 88.** The xTB geometry optimized structure of **Rh1@Fe<sub>4</sub>(Zn-L)<sub>6</sub> (ee isomer)**. The energy of the host-guest complex is put at 0 kcal/mol and the energies of the other host-guest complexes are compared with it.

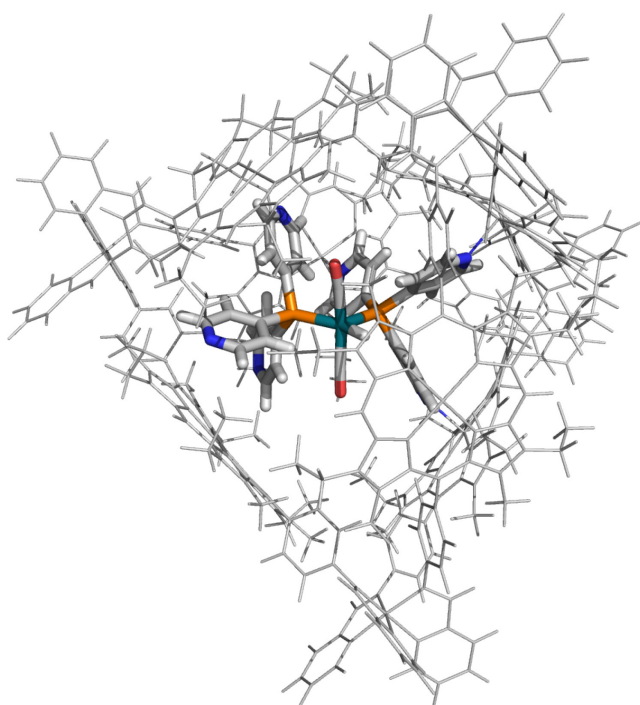

**28 kcal/mol**

**Figure S 89.** The xTB geometry optimized structure of **Rh2@Fe<sub>4</sub>(Zn-L)<sub>6</sub> (ea isomer)**. The energy of the host-guest complex is compared to the host-guest complex with encapsulated ee isomer.

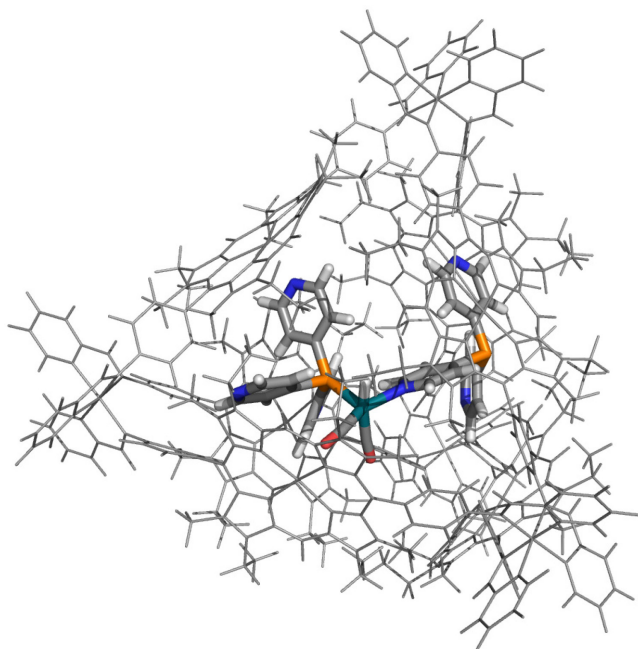

45 kcal/mol

**Figure S 90.** The xTB geometry optimized structure of  $\text{Rh5@Fe}_4(\text{Zn-L})_6$  (**P-N isomer**). The energy of the host-guest complex is compared to the host-guest complex with encapsulated **ee** isomer.

**Table S 13.** Bond lengths and bond angles obtained from the xTB optimized structures.

| Parameter        | <b>ee</b> isomer | <b>ea</b> isomer | <b>P-N</b> isomer |
|------------------|------------------|------------------|-------------------|
| Rh-P bond length | 2.30 Å, 2.45 Å   | 2.32 Å, 2.45 Å   | 2.43 Å            |
| C-Rh bond length | 1.92 Å, 1.96 Å   | 1.92 Å, 1.93 Å   | 1.87 Å, 1.95 Å    |
| H-Rh bond length | 1.61 Å           | 1.61 Å           | 1.63 Å            |
| N-Rh bond length | -                | -                | 2.26 Å            |
| P-Rh-P angle     | 117.4°           | 106.9°           | -                 |
| N-Rh-P angle     | -                | -                | 96.3°             |

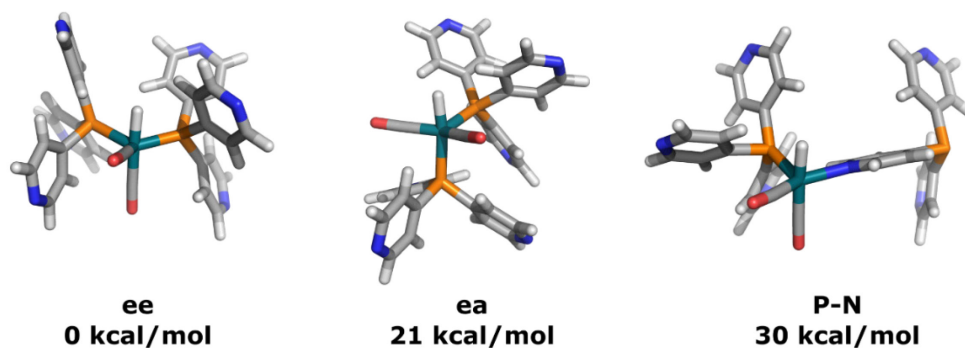

**Figure S 91.** The xTB geometry optimized structures of complexes with **ee**, **ea** and **P-N** geometry extracted from the host-guest structures followed by DFT geometry optimization by freezing all atoms except for the CO and hydrido ligands. The energy of the **ee** isomer is put at 0 kcal/mol and the other isomers are compared with it.

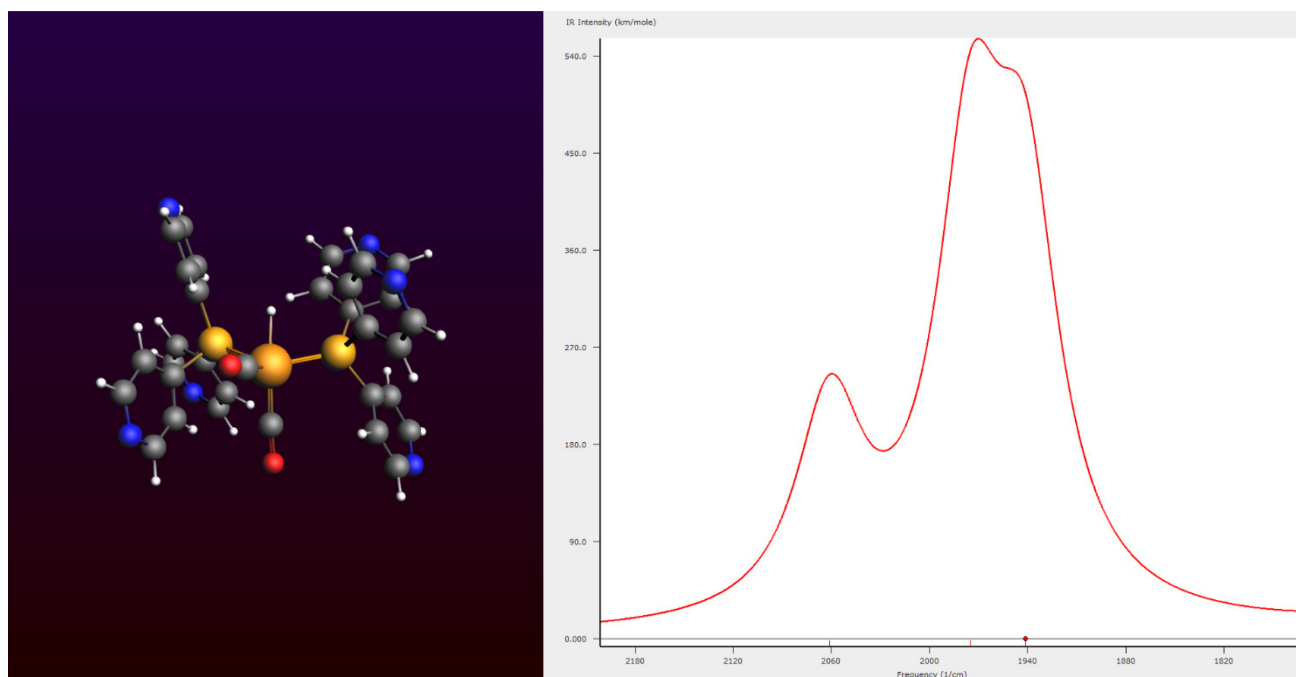

**Figure S 92.** DFT calculated IR spectrum of the encapsulated rhodium complex with **ee** geometry. The found vibrational frequencies are 1941, 1975 and 2061  $\text{cm}^{-1}$ .

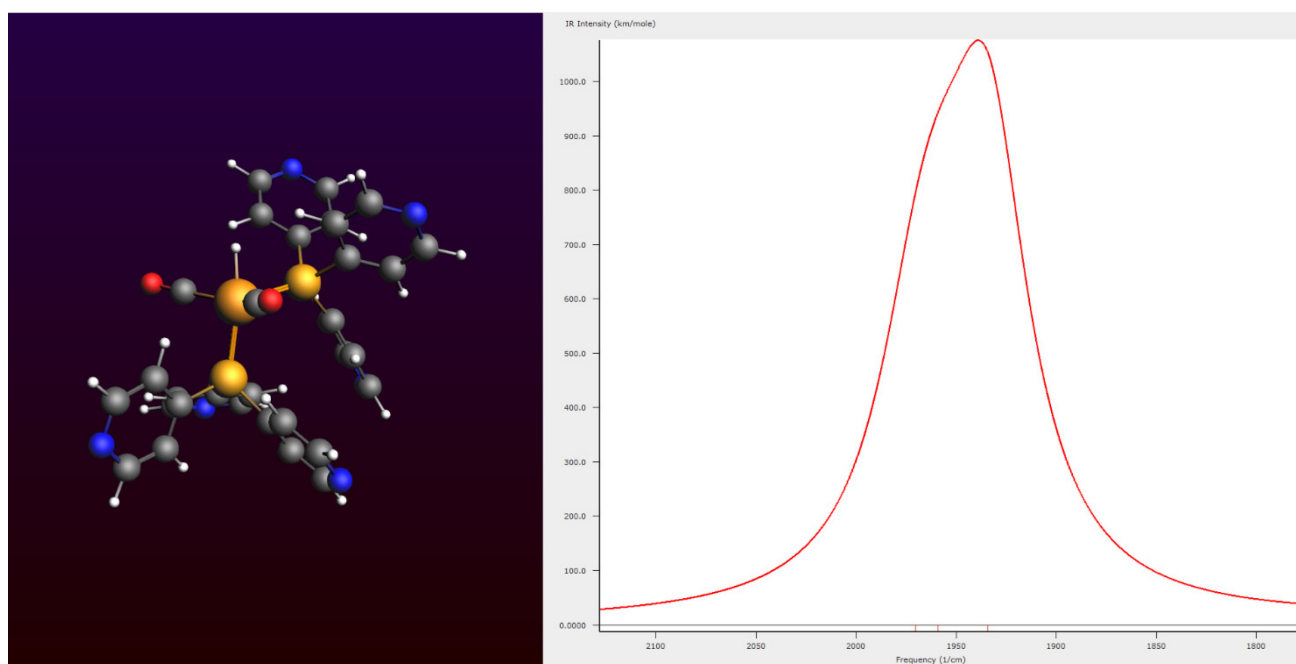

**Figure S 93.** DFT calculated IR spectrum of the encapsulated rhodium complex with **ea** geometry. The found vibrational frequencies are 1934, 1959 and 1970  $\text{cm}^{-1}$ .

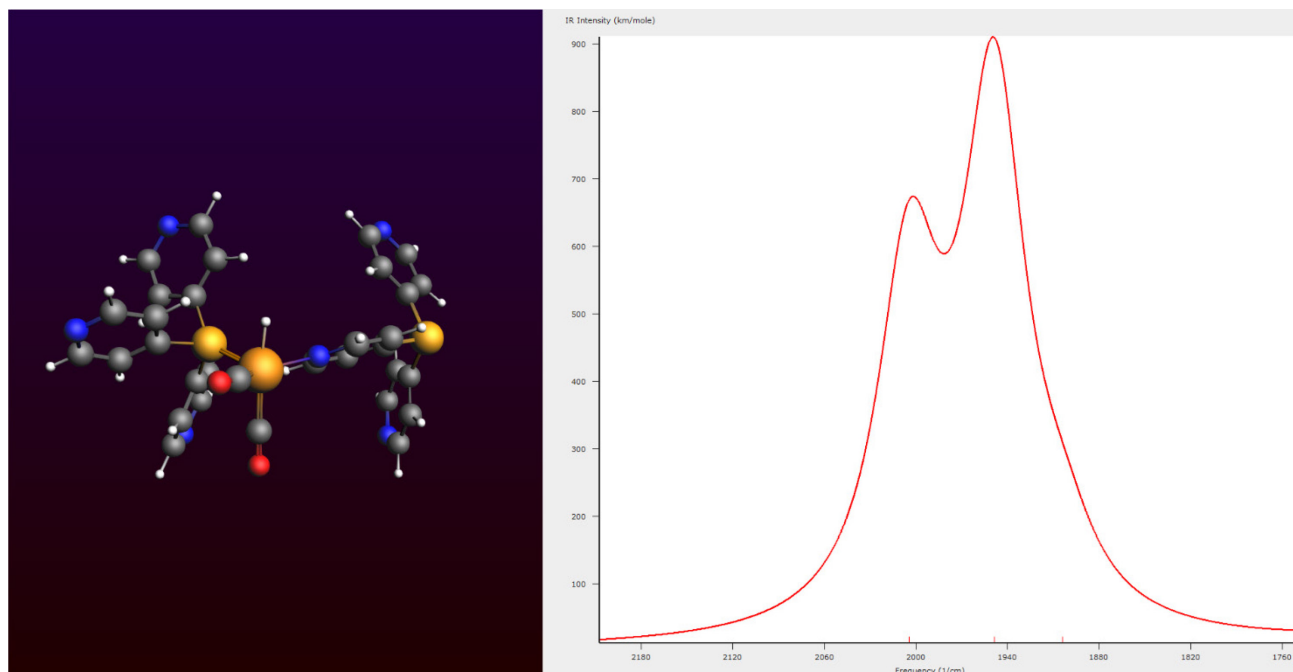

**Figure S 94.** DFT calculated IR spectrum of the encapsulated rhodium complex with P-N geometry. The found vibrational frequencies are 1904, 1949 and 2005  $\text{cm}^{-1}$ .

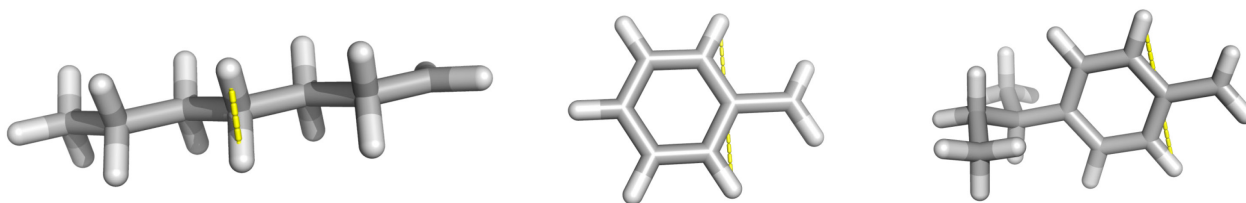

**Figure S 95.** Spartan geometry optimized structures of 1-octene, styrene and 4-*tert*-butylstyrene. The yellow dashed line represents the shortest H-H distance of the molecule.

## 12. Catalysis

All catalytic reactions were carried out in dry and degassed acetonitrile. Standard solutions for the pre-catalyst, ligand, sphere and substrate in acetonitrile were first prepared. Next, a mini autoclave (15 mL) with a separate sample container was evacuated and purged with  $\text{N}_2$  three times. The pre-catalyst solution (1 mL) and the ligand solution (1 mL) were mixed in a dry Schlenk flask under  $\text{N}_2$  to allow for complex formation, where after the resulting pale yellow solution was injected into the mini autoclave using a syringe with a long stainless steel needle ( $\sim 25$  cm). The autoclave was purged with 20 bar syngas ( $\text{CO}:\text{H}_2 = 1:1$ ) three times, and subsequently pressurised with 20 bar of syngas ( $\text{CO}:\text{H}_2$ ). The solution in the autoclave was allowed to pre-incubate for 1 h at room temperature while being stirred at 900 rpm. Next, the sphere solution (1 mL) and substrate solution (1 mL) were mixed in a dry Schlenk flask under  $\text{N}_2$  to give a dark red-purple solution. The top part of the autoclave was de-pressurised while the bottom part of the autoclave containing the catalyst-ligand solution maintained a pressure of 20 bar syngas. The dark purple solution was injected into the sample container of the autoclave under a flow of  $\text{N}_2$ , and the

container was purged with 20 bar syngas three times. The sphere-substrate solution was injected into the autoclave with a 5 bar overpressure of syngas and the final pressure was adjusted to 20 bar. The autoclave was transferred into a pre-heated oil bath and the reaction was stirred with constant speed (900 rpm). After the reaction was finished the autoclave was cooled in an ice bath and depressurised. Two drops of *n*-tributylphosphite were added to quench the active rhodium catalyst, along with decane as an external standard. An aliquot of the reaction mixture was diluted with dichloromethane and injected into the GC directly without workup or product isolation.

Standard solutions prepared:

**A:**  $[\text{Rh}(\text{acac})(\text{CO})_2] = 0.6 \text{ mM}$

**B:**  $[\text{L3}] = 1.2 \text{ mM}$

**C:**  $[\text{Fe}_4(\text{Zn-L})_6] = 0.6 \text{ mM}$

**D:**  $[\text{Substrate}] = 120 \text{ mM}$  (for mixtures of substrates each substrate at 120 mM)

Upon mixing the above standard solutions as described above, the following final catalytic concentrations were obtained:

$[\text{Rh}(\text{acac})(\text{CO})_2] = 0.15 \text{ mM}$

$[\text{L3}] = 0.30 \text{ mM}$

$[\text{Fe}_4(\text{Zn-L})_6] = 0.15 \text{ mM}$

$[\text{Substrate}] = 30 \text{ mM}$  (for mixtures of substrates each substrate at 30 mM)

GC methods for the analysis of the hydroformylation products:

- 1. Hydroformylation of 1-hexene.** Initial temperature = 30°C for 2 min, then 10°C/min to 300°C.  $t_R$  (1-hexene) = 3.68 min,  $t_R$  (linear heptanal) = 8.36 min, and  $t_R$  (branched heptanal) = 7.71 min.
- 2. Hydroformylation of 1-heptene, 1-octene, 1-nonene, 1-decene, styrene and 4-tBu-styrene.** Initial temperature = 50°C for 2 min, then 10°C/min to 300°C.  $t_R$  (1-heptene) = 3.74 min,  $t_R$  (1-octene) = 5.04 min,  $t_R$  (1-nonene) = 6.62 min,  $t_R$  (1-decene) = 8.27 min,  $t_R$  (styrene) = 6.46 min, and  $t_R$  (4-tBu-styrene) = 11.66 min,  $t_R$  (linear octanal) = 8.16 min,  $t_R$  (branched octanal) = 7.58 min,  $t_R$  (linear nonanal) = 9.76 min,  $t_R$  (branched nonanal) = 9.18 min,  $t_R$  (linear decanal) = 11.30 min,  $t_R$  (branched decanal) = 10.75 min,  $t_R$  (linear undecanal) = 12.65 min,  $t_R$  (branched undecanal) = 12.13 min,  $t_R$  (linear styrene aldehyde) = 10.40 min,  $t_R$  (branched styrene aldehyde) = 9.60 min,  $t_R$  (linear 4-tBu-styrene aldehyde) = 14.16 min,  $t_R$  (branched 4-tBu-styrene aldehyde) = 12.82 min.



### 13. High-pressure Infrared (HP IR) studies under syngas

These experiments were performed in a stainless steel autoclave equipped with IRTRAN windows (ZnS, transparent up to  $700\text{ cm}^{-1}$ , optical path length 0.4 mm) with mechanical stirring. The autoclave contains a separate sample container which allows for the addition of a second solution to the main chamber with an overpressure of syngas, so that the main chamber does not have to be de-pressurized.

A flame-dried schlenk was charged with nanocage  $\text{Fe}_4(\text{Zn-L})_6$  (35.5 mg,  $5.2\ \mu\text{mol}$ ) and dry and degassed acetonitrile (2.1 mL) and dichloromethane (1.4 mL) was added to yield a dark purple solution. In a separate flame-dried schlenk flask  $\text{Rh}(\text{acac})(\text{CO})_2$  (1.34 mg,  $5.2\ \mu\text{mol}$ ) and **L3** (2.76 mg,  $10.4\ \mu\text{mol}$ ) were dissolved in acetonitrile (0.3 mL) and dichloromethane (0.2 mL) to yield a pale yellow solution. Next, the cage solution was injected into the main chamber of the autoclave under a flow of  $\text{N}_2$ . The autoclave was purged with 20 bar  $\text{H}_2/\text{CO}$  three times, where after it was pressurized to 20 bar  $\text{H}_2/\text{CO}$ . Following this, the catalyst solution was injected into the separate sample container under a flow of  $\text{N}_2$ , without de-pressurizing the main chamber. The sample container was also purged with 20 bar  $\text{H}_2/\text{CO}$  three times, where after it was pressurized to 30 bar  $\text{H}_2/\text{CO}$ . The solution in the autoclave was heavily stirred with a mechanical stirrer and after an equilibration time of 20 min a background spectrum was collected. Finally, the content of the sample container was added to the main chamber, and a series of measurements were started. For the deuteride experiments the same procedure was repeated using  $\text{D}_2/\text{CO}$  instead of  $\text{H}_2/\text{CO}$ . When no cage was used in an experiment, the background spectrum was collected with pure acetonitrile at 20 bar syngas.

## 14. Cage stability under hydroformylation conditions

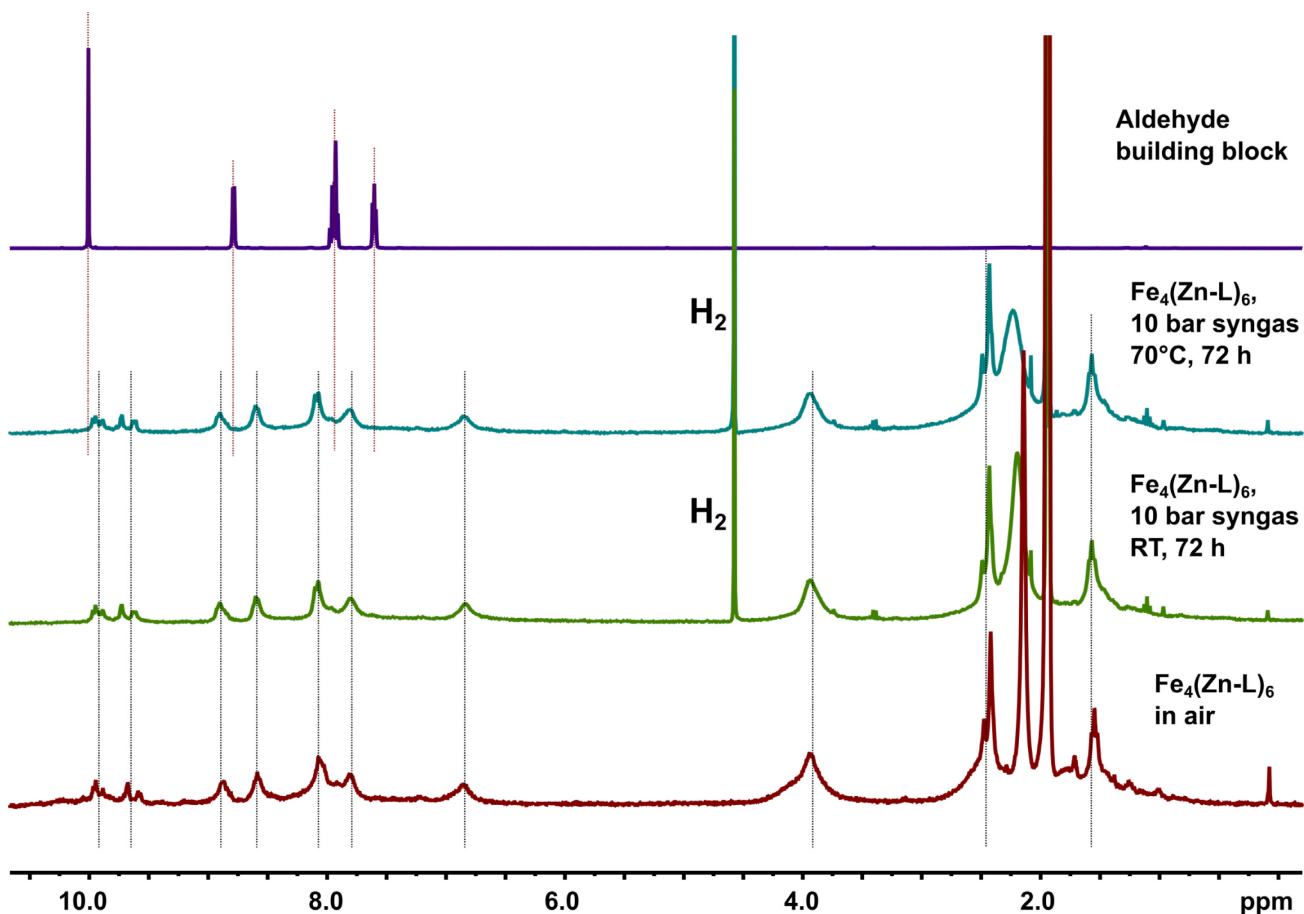

**Figure S 96.** Cage stability under hydroformylation conditions. (top) Aldehyde building block. (second from top)  $\text{Fe}_4(\text{Zn-L})_6$  at 10 bar syngas at 70°C for 72 h. (second from bottom)  $\text{Fe}_4(\text{Zn-L})_6$  at 10 bar syngas at room temperature for 72 h. (bottom)  $\text{Fe}_4(\text{Zn-L})_6$  in air. The black dotted lines show that all cage spectra overlap, confirming the stability of the cage under the applied conditions. The red dotted lines show that no aldehyde building block is formed, also confirming the stability of the cage.

## 15. General titration fitting procedure

### *Fitting procedure*

Regardless of the supramolecular model and spectroscopic method, the fitting procedure for the determination of the association constants is as follows: At each titration point  $n$  in  $N$  (the total number of titration points) the initial concentrations for the host and guest species  $[\text{H}]_{0,n}$  and  $[\text{G}]_{0,n}$  are known, as are the observed values for either chemical shift  $\delta_{\text{atom,obs},n}$  or absorption  $A_{\lambda,\text{obs},n}$ , which we will collectively call  $O_{\text{obs},n}$ . The fitting procedure is based around the COBYLA numerical optimization routine<sup>[10]</sup> which tries to minimise the difference between the observed values and calculated values, given the constraint that association constants and concentrations are greater than zero:

$$\text{minimize} \quad F_n = |O_{\text{obs},n} - O_{\text{calc},n}|, \quad n \in N$$

subject to  $\{[S]_n; K; \alpha\} \geq 0$   $n \in N$ , for all species  $S = \{H, G, HG, HGG, \dots\}$

The objective function  $F_n$  for the optimisation procedure calculates  $O_{calc,n}$  through the formulae for  $A_\lambda$  or  $\delta_{atom}$  (*vide supra*). E.g. in the case of a 1:1 HG titration followed by UV-vis, the objective function becomes:

$$F_n = |O_{obs,n} - O_{calc,n}| = |A_{obs,n} - A_{calc,n}| = |A_{obs,n} - \epsilon_H[H] + \epsilon_{HG}[HG]|$$

Given initial guesses for the association constants  $\{K; \alpha\}$ ,  $[H]$  and  $[HG]$  can be calculated from the initial concentrations  $[H]_0$  and  $[G]_0$ . Since the fitting procedure calls this routine very often (in our cases roughly between  $10^2$  and  $10^6$  times per fitting procedure, depending on the size of the problem (e.g. HG versus HGG)), we use a 'rapid numerical integration algorithm for finding the equilibrium state of a system of coupled binding reactions'.<sup>[11]</sup> The objective function is then evaluated using initial guesses for the species coefficients ( $\delta$  or  $\epsilon$ ), and the optimisation routine determines whether a minimum has been found or that the initial guesses have to be adjusted to provide a better fit to the data.

When a minimum has been found, the error distributions (difference between calculated and observed values) are visually checked for trends. If trends are observed that point towards a different model (e.g. cooperativity *versus* no cooperativity, or HGG *versus* HGGG), these models are fitted to the data as well and the different error distributions are compared between models.

### **Initial guesses and quality of fit**

Since multi-parameter optimisations are difficult problems to accurately solve (many parameters, few observables), the quality of the fit should be scrutinised: The microscopic association constant in larger (e.g. 1:2) systems should be in the range for the same constant in the 1:1 system in the same solvent. The species coefficients ( $\delta$  or  $\epsilon$ ) have to make sense, such that e.g. in the case of a HHHG system where the host H is tracked by UV-vis, the relation  $\epsilon_{HG} \approx \frac{1}{2}\epsilon_{HHG} \approx \frac{1}{3}\epsilon_{HHHG}$  should hold, since the absorptivity per 'bound host' molecule shouldn't change appreciably in the system. Initial guesses for the optimisation procedure are made using similar, simplified relations and ideas, where e.g. in a HHHG UV-vis titration, almost all host molecules are bound in the HG form at the end of the titration curve, allowing for an estimate of  $\epsilon_{HG}$  and thereby estimates of all other coefficients. Starting from these 'proper' guesses, the optimisation routine is generally both fastest *and* most accurate.

The accuracy of these optimisations turns out to be an ill-defined problem in supramolecular chemistry.<sup>[12]</sup> Our current understanding of this problem (after fitting a broad range of 'bad' and 'good' titrations), is that non-accurate additions during titrations translate *directly* into a noisy energy landscape with a noisy minimum. Combined with the fact that optimisation routines can never guarantee to find a global minimum, the found minimum is heavily dependent on the quality of the titration data and on the direction through which the minimum is approached (i.e. the initial guesses). Thus, when a minimum is found by the optimisation routine, we approach this minimum from multiple sides to assure this is in fact a global minimum, or to get an estimate on the size of the minimum. E.g. if we approach a one-dimensional problem from two extreme initial guesses and find minima at 900 and 1100, respectively, we conclude that the actual minimum is somewhere between these values and thereby immediately get a rough estimate of the accuracy with which we can determine the association constant.

### **The good/bad fitting to different binding models**

In this article only 1:1, 1:2 and 1:3 host-guest stoichiometries have been fitted using an online software (*vide infra*). The fitting of all the acquired data is always first attempted with a 1:1 host-guest binding model. A 1:1 model can always be disqualified when the titration curves lack isosbestic points as this

means that a simple transition from one species (H) to another one (HG) does not occur. Only the titration between  $\text{Fe}_4(\text{Zn-L})_6$  and **Py** displays clear isosbestic points and gave the best fit with a 1:1 binding model. For all other studied guests (**L1**, **L2**, **L3** and **Au1**) the isosbestic point is lost at some point in the titration and for all these titrations both a 1:2 and 1:3 binding model was fitted. Higher stoichiometries (1:4, 1:5 and 1:6) could not be accurately fitted as these will not be filled at the guest concentrations applied in the titration. By comparing the  $R^2$  values of the 1:2 and 1:3 fits along with their error distributions, we could determine which model fits the experimental data the best. Specifically, we look at the overall error magnitude in addition to possible trends in the error distribution which show whether the fit is good or bad.

### ***Software used to fit all titration data***

An in-house developed script was used to fit all the acquired titration data and the online script is available here: <http://limhes.net/optim/>

The software is developed by Dr. René Becker, previously affiliated with the University of Amsterdam. The software has been experimentally validated with known literature systems (e.g.  $\text{Zn}^{\text{II}}$ TPP with pyridine) and gives association constants consistent with literature values. Moreover, the software has been applied to many literature systems and is successfully used in five peer-reviewed publications.<sup>[13–17]</sup>

*Information about the software taken from the website:*

On the webpage binding/association constants from titration data can be determined using any equilibrium model. Commonly known approximation methods such as the Benesi–Hildebrand or Scatchard plot are not used, but a non-linear optimization is applied to fit the observed titration data to calculated titration data, which is calculated by numerically solving equilibrium concentrations from a set of binding constants and equilibrium reactions. Therefore, the equilibrium species concentrations do not have to be algebraically solved (Hunter's method; recently implemented by Thordarson at Supramolecular.org), which limits the equilibrium models to 1:1, 1:2 and 2:1 stoichiometries. The website offers functionality similar to HypNMR.

System of equilibria / supramolecular system

The example system is a 2:1 (HHG) system, where a host molecule H (B) can bind to a guest molecule G (AA) according to the chemical equilibrium depicted below. The 'host molecule' is defined as the molecule whose initial concentration remains constant for each point in the titration, since this is the molecule whose (changing) properties are going to be tracked. The guest molecule's initial concentration is increased over the course of the titration.

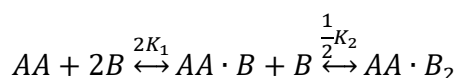

Binding constants (microscopic/macroscopic), statistical factors and cooperativity parameters

In this supramolecular system, the equilibrium constants  $K_1$  and  $K_2$  are the so-called microscopic binding constants, which can be seen as the binding constant that would be observed in the case of 1:1 binding for identical molecular binding sites. The factors 2 and  $\frac{1}{2}$  are statistical factors which can very often be deduced by simple reasoning: there are 2 paths to go from AA to AA·B (either the left side binds, or the right side binds), but only 1 path to go from AA·B to AA. The statistical factor is then  $2/1 = 2$ . For the second equilibrium, the reasoning is the same: there is only 1 path to go from AA·B to AA·B<sub>2</sub> (only one

side can bind, the other is already bound), but there are 2 paths to go from AA·B<sub>2</sub> to AA·B (remove bound species from either left or right side). The statistical factor is then  $1/2 = \frac{1}{2}$ .

When the system is *non-cooperative*, this means that the first binding event does not influence the second binding event, and  $K_1 = K_2 = K_{\text{ass}}$ . When the system is *cooperative*, the opposite holds, and the microscopic association constants are not equal. In this software, we depict this inequality through cooperativity parameters, as in  $K_1 = K_{\text{ass}}$  and  $K_2 = \alpha_1 \cdot K_{\text{ass}}$ .

Concentrations, observed values and coefficients

To determine the association constant  $K_{\text{ass}}$  and the cooperativity parameter  $\alpha_1$  for the system described above, a titration is performed by keeping the initial host concentration  $[H]_0$  constant, while incrementing the initial guest concentration  $[G]_0$ . For each point on the titration curve, some (e.g. spectroscopically, calorimetrically, ...) experimentally observed value  $O_{\text{exp}}$  is recorded. These initial concentrations and experimentally observed values should be entered in the DATA tab.

How the software does its job

The software then calculates "observed" values  $O_{\text{calc}} = \beta_{\text{H}} \cdot [H] + \dots + \beta_{\text{HHG}} \cdot [\text{HHG}]$ . The coefficients  $\beta_{\text{species}}$  are e.g. the molar extinction coefficients  $\epsilon_{\text{species}}$  (for UV-vis titrations) or the chemical shifts  $\delta_{\text{species}}$  (for NMR titrations) of the respective species, which are optimized by the software and whose initial guesses should be entered in the FITTING tab. The equilibrium concentrations of the species present in the system ( $[H]$ ,  $[G]$ ,  $[HG]$  and  $[HHG]$ ) are calculated from the initial concentrations  $[H]_0$  and  $[G]_0$ ,  $K_{\text{ass}}$  and  $\alpha_1$  using a numerical algorithm developed by D. Bray and S. Lay. The values for  $K_{\text{ass}}$  and  $\alpha_1$  are also optimized by the software (that's the whole point!) and their initial guesses should also be entered in the FITTING tab. The software optimizes these values by minimizing the error between  $O_{\text{calc}}$  and  $O_{\text{exp}}$ .

## 16. References

- [1] R. J. Bowen, A. C. Garner, S. J. Berners-Price, I. D. Jenkins, R. E. Sue, *J. Organomet. Chem.* **1998**, *554*, 181–184.
- [2] M. A. Weiner, P. Schwartz, *Inorg. Chem.* **1975**, *14*, 1714–1716.
- [3] T. E. Müller, J. C. Green, D. M. P. Mingos, C. M. McPartlin, C. Whittingham, D. J. Williams, T. M. Woodroffe, *J. Organomet. Chem.* **1998**, *551*, 313–330.
- [4] A. Helms, D. Heiler, G. McLendon, *J. Am. Chem. Soc.* **1992**, *114*, 6227–6238.
- [5] C. Poriel, Y. Ferrand, S. Juillard, P. Le Maux, G. Simonneaux, *Tetrahedron* **2004**, *60*, 145–158.
- [6] D. M. Wood, W. Meng, T. K. Ronson, A. R. Stefankiewicz, J. K. M. Sanders, J. R. Nitschke, *Angew. Chem. Int. Ed.* **2015**, *54*, 3988–3992.
- [7] M. Holz, X. A. Mao, D. Seiferling, A. Sacco, *J. Chem. Phys.* **1996**, *104*, 669–679.
- [8] N. R. Voss, M. Gerstein, *Nucleic Acid Res.* **2010**, *38*, W555–562.
- [9] S. Grimme, C. Bannwarth, P. Shushkov, *J. Chem. Theory Comput.* **2017**, *13*, 1989–2009.
- [10] M. J. D. Powell, in *Adv. Optim. Numer. Anal.*, Springer Netherlands, Dordrecht, **1994**, pp. 51–67.
- [11] D. Bray, S. Lay, *Comput. Appl. Biosci.* **1994**, *10*, 471–6.
- [12] D. Brynn Hibbert, P. Thordarson, *Chem. Commun.* **2016**, *52*, 12792–12805.

- [13] P. Li, S. Amirjalayer, F. Hartl, M. Lutz, B. de Bruin, R. Becker, S. Woutersen, J. N. H. Reek, *Inorg. Chem.* **2014**, *53*, 5373–5383.
- [14] R. Becker, S. Amirjalayer, P. Li, S. Woutersen, J. N. H. Reek, *Sci. Adv.* **2016**, *2*, e1501014.
- [15] X. Wang, S. S. Nurttala, W. I. Dzik, R. Becker, J. Rodgers, J. N. H. Reek, *Chem. Eur. J.* **2017**, *23*, 14769–14777.
- [16] S. S. Nurttala, R. Becker, J. Hessels, S. Woutersen, J. N. H. Reek, *Chem. Eur. J.* **2018**, *Accepted*.
- [17] S. Derossi, R. Becker, P. Li, F. Hartl, J. N. H. Reek, *Dalt. Trans.* **2014**, *43*, 8363–8367.
